# Supplementary material for: Genome and time-of-day transcriptome of Wolffia australiana link morphological minimization with gene loss and less growth control
Source: HighWire-hosted journal article supplement (doi:10.1101/gr.266429.120), 2020-12-23
Supplement: SuppTables_rev.xlsx [file SuppTables_rev.xlsx]

## Sheet: Supplemental_Table_S1
Supplemental Table S1. Wolffia australiana growth rates.
Clone No.	RGR (d-1) ± SE	DT (d) ± SE	RY (g g-1 Week-1) ± SE
wa7211	0.3739±0.0068	1.857±0.033	13.78±0.68
wa7540	0.4890±0.0062	1.419±0.018	30.81±1.37
wa7733	0.4454±0.0118	1.562±0.044	22.96±1.75
wa8730	0.4167±0.0485	1.66±0.02	18.54±0.63
RGR: relative growth rate; DT: doubling time; RY: relative yield

## Sheet: Supplemental_Table_S2
Supplemental Table S2. BioNano Genomics optical map summary.
	wa8730	wa7733
Input contigs (#)	5413	3094
Scaffold (#)	464	362
Contigs in scaffolds (#)	307	752
Contigs not scaffodled (#)	4786	2216
Deletions/collapsed (#)	6	87
Insertions/duplication (#)	19	149
Max gaps (bp)	617910	776765
Max contigs per scaffold (#)	5	13

## Sheet: Supplemental_Table_S3
Supplemental Table S3. Wolffia australiana genome size estimates by flow cytometry.
	1C (pg)	SD (pg)	1C (Mb)	SD (Mb)
wa7211	0.892031	0.0130181	436.203	6.36583
wa7540	0.884132	0.00927969	432.34	4.53777
wa7733	0.902265	0.00484541	441.207	2.3694
wa8730	0.882484	0.00129705	431.535	0.63426
SD, standard deviation; pg, picograms; Mb, megabases
1C, haploid genome represenation

## Sheet: Supplemental_Table_S4
Supplemental Table S4. Ribosomal DNA content of the Wolffia genomes.
rDNA found in the draft Wolffia assemblies
	wa7733	wa8730
18S rDNA (#)	13	9
5.8S rDNA (#)	6	3
26S rDNA (#)	22	15
5S rDNA (#)	151	59
rDNA copy number estimated by coverage analysis with Illumina reads
	rDNA (#)	genome size (Mb)
Arabidopsis thaliana	570	157
Maize (Zea mays)	1200	2300
Spirodela polyrhiza 9509	94	158
Wolffia australiana 7733	224	393
Wolffia australiana 8730	194	354

## Sheet: Supplemental_Table_S5
Supplemental Table S5. BUSCO scores across Wolffia and Spirodela genomes.
	wa7733	wa7733	wa8730	wa8730	sp7498	sp7498	sp9509	sp9509
	count	ratio	count	ratio	count	ratio	count	ratio
Single	2180	0.665	2199	0.6708	2442	0.745	2445	0.7459
Duplicated	75	0.0229	82	0.025	116	0.0354	131	0.04
Fragmented	261	0.0796	266	0.0811	261	0.0796	254	0.0775
Missing	762	0.2325	731	0.223	459	0.14	448	0.1367
Complete	2255	0.6879	2281	0.6959	2558	0.7804	2576	0.7858
BUSCO (v3) liliopsida odb10

## Sheet: Supplemental_Table_S6
Supplemental Table S6. Missing BUSCO genes in wa8730 with Arabidopsis representative and annotation.
#	BUSCO(#)	At gene ID	Arabidopsis (At) annotation TAIR11
1	2	AT5G23110	Zinc finger, C3HC4 type (RING finger) family protein
2	56	AT3G06530	ARM repeat superfamily proteinARM repeat superfamily protein
3	71	AT1G05830	ATX2_SDG30__trithorax-like protein 2
4	73	AT1G77300	ASHH2_CCR1_EFS_LAZ2_SDG8__histone methyltransferases(H3-K4 specific);histone methyltransferases(H3-K36 specific)
5	101	AT1G01040	ASU1_ATDCL1_CAF_DCL1_EMB60_EMB76_SIN1_SUS1__dicer-like 1
6	155	AT2G39580
7	178	AT3G27670	RST1__ARM repeat superfamily protein
8	199	AT3G14980	IDM1_ROS4__Acyl-CoA N-acyltransferase with RING/FYVE/PHD-type zinc finger proteinIDM1_ROS4__Acyl-CoA N-acyltransferase with RING/FYVE/PHD-type zinc finger protein
9	262	AT5G02880	UPL4__ubiquitin-protein ligase 4UPL4__ubiquitin-protein ligase 4UPL4__ubiquitin-protein ligase 4UPL4__ubiquitin-protein ligase 4
10	277	AT4G21820	binding;calmodulin bindingbinding;calmodulin binding
11	330	AT5G55540	LOP1_TRN1__tornado 1
12	366	AT5G07400	forkhead-associated domain-containing protein / FHA domain-containing protein
13	384	AT3G28860	ABCB19_ATABCB19_ATMDR1_ATMDR11_ATPGP19_MDR1_MDR11_PGP19__ATP binding cassette subfamily B19
14	401	AT1G10200	AtWLIM1_WLIM1__GATA type zinc finger transcription factor family protein
15	475	AT1G08840	emb2411_JHS1__DNA replication helicase, putative
16	500	AT2G48110	MED33B_MED5B_REF4__reduced epidermal fluorescence 4
17	501	AT1G35660
18	517	AT5G04290	KTF1_SPT5L__kow domain-containing transcription factor 1
19	520	AT1G53050	Protein kinase superfamily proteinProtein kinase superfamily protein
20	545	AT5G02880	UPL4__ubiquitin-protein ligase 4UPL4__ubiquitin-protein ligase 4UPL4__ubiquitin-protein ligase 4UPL4__ubiquitin-protein ligase 4
21	551	AT5G36740	Acyl-CoA N-acyltransferase with RING/FYVE/PHD-type zinc finger protein
22	564	AT3G28345	ABCB15_MDR13__ABC transporter family protein
23	573	AT1G10680	ABCB10_PGP10__P-glycoprotein 10
24	600	AT1G77620	P-loop containing nucleoside triphosphate hydrolases superfamily protein
25	616	AT5G52910	ATIM__timeless family protein
26	627	AT1G10050	glycosyl hydrolase family 10 protein / carbohydrate-binding domain-containing protein
27	649	AT4G29790
28	674	AT3G16830	TPR2__TOPLESS-related 2
29	711	AT5G35930	AMP-dependent synthetase and ligase family protein
30	745	AT1G21630	Calcium-binding EF hand family protein
31	777	AT5G66820
32	798	AT3G06880	Transducin/WD40 repeat-like superfamily proteinTransducin/WD40 repeat-like superfamily protein
33	883	AT4G29440	ISTL4__Regulator of Vps4 activity in the MVB pathway protein
34	923	AT4G16100	Protein of unknown function (DUF789)
35	936	AT1G15240	Phox-associated domain;Phox-like;Sorting nexin, C-terminal
36	946	AT2G15900	Phox-associated domain;Phox-like;Sorting nexin, C-terminal
37	956	AT4G23540	ARM repeat superfamily protein
38	1046	AT1G78280	transferases, transferring glycosyl groups
39	1058	AT5G45500	RNI-like superfamily protein
40	1079	AT2G47980	ATSCC3_SCC3__sister-chromatid cohesion protein 3
41	1234	AT4G26790	GDSL-like Lipase/Acylhydrolase superfamily protein
42	1240	AT4G23440	Disease resistance protein (TIR-NBS class)
43	1243	AT5G43530	RAD5B__Helicase protein with RING/U-box domain
44	1269	AT3G44730	AtKIN14h_ATKP1_KP1__kinesin-like protein 1
45	1342	AT2G32810	BGAL9_BGAL9__beta galactosidase 9
46	1391	AT2G47500	P-loop nucleoside triphosphate hydrolases superfamily protein with CH (Calponin Homology) domain
47	1420	AT5G17250	Alkaline-phosphatase-like family protein
48	1441	AT5G43630	TZP__zinc knuckle (CCHC-type) family protein
49	1499	AT5G04360	ATLDA_ATPU1_LDA_PU1__limit dextrinase
50	1504	AT2G32415	AtRRP6L3_RRP6L3__Polynucleotidyl transferase, ribonuclease H fold protein with HRDC domain
51	1551	AT1G05960	ARM repeat superfamily proteinARM repeat superfamily protein
52	1565	AT2G22530	Alkaline-phosphatase-like family protein
53	1594	AT4G32010	HSI2-L1_HSL1_VAL2__HSI2-like 1
54	1597	AT5G60410	ATSIZ1_SIZ1__DNA-binding protein with MIZ/SP-RING zinc finger, PHD-finger and SAP domain
55	1608	AT5G58510
56	1790	AT3G08840	D-alanine--D-alanine ligase family
57	1794	AT3G20150	Kinesin motor family protein
58	1817	AT1G67310	Calmodulin-binding transcription activator protein with CG-1 and Ankyrin domainsCalmodulin-binding transcription activator protein with CG-1 and Ankyrin domains
59	1882	AT1G19220	ARF11_ARF19_IAA22__auxin response factor 19
60	1946	AT1G18900	Pentatricopeptide repeat (PPR) superfamily protein
61	1959	AT1G09060	JMJ24__Zinc finger, RING-type;Transcription factor jumonji/aspartyl beta-hydroxylaseJMJ24__Zinc finger, RING-type;Transcription factor jumonji/aspartyl beta-hydroxylaseJMJ24__Zinc finger, RING-type;Transcription factor jumonji/aspartyl beta-hydroxylase
62	2058	AT5G64320	MTL1__Pentatricopeptide repeat (PPR) superfamily protein
63	2062	AT3G22430
64	2077	AT5G08740	NDC1__NAD(P)H dehydrogenase C1
65	2167	AT1G16540	ABA3_ACI2_ATABA3_AtLOS5_LOS5_SIR3__molybdenum cofactor sulfurase (LOS5) (ABA3)
66	2173	AT1G72440	EDA25_SWA2__CCAAT-binding factorEDA25_SWA2__CCAAT-binding factorEDA25_SWA2__CCAAT-binding factor
67	2196	AT3G11560	LETM1-like protein
68	2292	AT5G23720	PHS1__dual specificity protein phosphatase family proteinPHS1__dual specificity protein phosphatase family proteinPHS1__dual specificity protein phosphatase family protein
69	2356	AT1G55550	P-loop containing nucleoside triphosphate hydrolases superfamily protein
70	2388	AT2G46060	transmembrane protein-related
71	2405	AT3G18640	Zinc finger C-x8-C-x5-C-x3-H type family protein
72	2429	AT1G05970	AIPP1__RNA-binding (RRM/RBD/RNP motifs) family protein
73	2455	AT5G23720	PHS1__dual specificity protein phosphatase family proteinPHS1__dual specificity protein phosphatase family proteinPHS1__dual specificity protein phosphatase family protein
74	2547	AT1G72250	Di-glucose binding protein with Kinesin motor domain
75	2633	AT1G20760	Calcium-binding EF hand family protein
76	2636	AT1G60160	Potassium transporter family protein
77	2652	AT2G07170	ARM repeat superfamily protein
78	2673	AT2G20320	DENN (AEX-3) domain-containing protein
79	2715	AT5G35560	DENN (AEX-3) domain-containing protein
80	2726	AT1G72560	PSD__ARM repeat superfamily protein
81	2776	AT1G08400	RINT-1 / TIP-1 family
82	2788	AT4G21610	LOL2__lsd one like 2
83	2951	AT4G24790	AAA-type ATPase family proteinAAA-type ATPase family protein
84	2984	AT5G24080	Protein kinase superfamily protein
85	2988	AT5G56790	Protein kinase superfamily protein
86	3020	AT1G21651	zinc ion bindingzinc ion binding
87	3037	AT1G20780	ATPUB44_PUB44_SAUL1__senescence-associated E3 ubiquitin ligase 1
88	3115	AT3G25690	AtCHUP1_CHUP1__Hydroxyproline-rich glycoprotein family proteinAtCHUP1_CHUP1__Hydroxyproline-rich glycoprotein family protein
89	3124	AT5G05680	EMB2789_MOS7__nuclear pore complex protein-related
90	3147	AT4G33300	ADR1-L1__ADR1-like 1
91	3160	AT5G23880	ATCPSF100_CPSF100_EMB1265_ESP5__cleavage and polyadenylation specificity factor 100
92	3161	AT5G43670	Sec23/Sec24 protein transport family proteinSec23/Sec24 protein transport family protein
93	3222	AT1G58370	ATXYN1_RXF12__glycosyl hydrolase family 10 protein / carbohydrate-binding domain-containing protein
94	3260	AT3G47700	MAG2__RINT-1 / TIP-1 family
95	3371	AT2G43410	FPA__RNA binding
96	3475	AT1G48840	Plant protein of unknown function (DUF639)
97	3494	AT3G06880	Transducin/WD40 repeat-like superfamily proteinTransducin/WD40 repeat-like superfamily protein
98	3497	AT3G04910	ATWNK1_WNK1_ZIK4__with no lysine (K) kinase 1
99	3505	AT1G69220	SIK1__Protein kinase superfamily protein
100	3533	AT3G04480	endoribonucleases
101	3560	AT2G15820	OTP51__endonucleases
102	3570	AT2G11000	ATMAK10_MAK10_MAK10__MAK10 homologue
103	3592	AT3G49650	P-loop containing nucleoside triphosphate hydrolases superfamily protein
104	3603	AT5G14720	Protein kinase superfamily protein
105	3616	AT1G79490	EMB2217__Pentatricopeptide repeat (PPR) superfamily protein
106	3623	AT1G21740	Protein of unknown function (DUF630 and DUF632)Protein of unknown function (DUF630 and DUF632)
107	3624	AT2G19240	Ypt/Rab-GAP domain of gyp1p superfamily protein
108	3628	AT4G24480	Protein kinase superfamily proteinProtein kinase superfamily protein
109	3649	AT3G55130	ABCG19_ATWBC19_WBC19__white-brown complex homolog 19
110	3768	AT3G19180	ARC6H_ATCDP1_CDP1_PARC6__paralog of ARC6ARC6H_ATCDP1_CDP1_PARC6__paralog of ARC6
111	3794	AT5G23910	ATP binding microtubule motor family protein
112	3882	AT3G54510	Early-responsive to dehydration stress protein (ERD4)
113	3901	AT5G41820	ATRGTA2_RGTA2__RAB geranylgeranyl transferase alpha subunit 2
114	3924	AT1G26370	RID1__RNA helicase family protein
115	3929	AT3G49490
116	3956	AT5G49830	EXO84B__exocyst complex component 84B
117	3983	AT1G75010	ARC3__GTP bindingARC3__GTP binding
118	4006	AT4G29940	PRHA__pathogenesis related homeodomain protein A
119	4049	AT1G62830	ATLSD1_ATSWP1_LDL1_LSD1_SWP1__LSD1-like 1
120	4070	AT5G03730	AtCTR1_CTR1_SIS1__Protein kinase superfamily protein
121	4107	AT1G53050	Protein kinase superfamily proteinProtein kinase superfamily protein
122	4152	AT5G63190	MRF1__MA3 domain-containing proteinMRF1__MA3 domain-containing protein
123	4160	AT4G03260	MASP1__Outer arm dynein light chain 1 protein
124	4196	AT3G13682	LDL2__LSD1-like2
125	4235	AT5G63190	MRF1__MA3 domain-containing proteinMRF1__MA3 domain-containing protein
126	4246	AT4G32180	ATPANK2_PANK2__pantothenate kinase 2ATPANK2_PANK2__pantothenate kinase 2
127	4248	AT2G32970
128	4282	AT1G18700	DNAJ heat shock N-terminal domain-containing protein
129	4341	AT5G39380	Plant calmodulin-binding protein-related
130	4471	AT3G12640	RNA binding (RRM/RBD/RNP motifs) family protein
131	4526	AT3G23740
132	4567	AT3G48900	AtSEND1_SEND1__single-stranded DNA endonuclease family protein
133	4666	AT2G01320	ABCG7__ABC-2 type transporter family protein
134	4700	AT1G53165	ATMAP4K ALPHA1__Protein kinase superfamily protein
135	4729	AT1G19100	AtMORC6_DMS11_MORC6__Histidine kinase-, DNA gyrase B-, and HSP90-like ATPase family protein
136	4741	AT3G21480	BRCT domain-containing DNA repair protein
137	4779	AT2G17550	TRM26
138	4838	AT1G01060	LHY_LHY1__Homeodomain-like superfamily protein
139	4860	AT3G23980	BLI_KOS1__BLISTER; The pleiotropic developmental mutant phenotype suggests that BLI prevents premature differentiation
140	4863	AT1G20060	ATP binding microtubule motor family protein
141	4938	AT5G51290	ACD5__Diacylglycerol kinase family protein
142	4947	AT3G01750	Ankyrin repeat family protein
143	5005	AT1G64050
144	5007	AT3G59470	FRF1__Far-red impaired responsive (FAR1) family protein
145	5035	AT2G20370	AtMUR3_KAM1_MUR3_RSA3__Exostosin family proteinAtMUR3_KAM1_MUR3_RSA3__Exostosin family protein
146	5038	AT2G33640	DHHC-type zinc finger family protein
147	5148	AT3G55510	RBL__Noc2p family
148	5157	AT3G49670	BAM2__Leucine-rich receptor-like protein kinase family protein
149	5181	AT5G13030
150	5184	AT1G74150	Galactose oxidase/kelch repeat superfamily protein
151	5214	AT1G70610	ABCB26_ATTAP1_TAP1__transporter associated with antigen processing protein 1
152	5245	AT5G04060	S-adenosyl-L-methionine-dependent methyltransferases superfamily protein
153	5285	AT1G76390	AtPUB43_PUB43__ARM repeat superfamily protein
154	5312	AT2G32900	ATZW10__centromere/kinetochore protein, putative (ZW10)
155	5326	AT1G79640	Protein kinase superfamily protein
156	5374	AT3G03570	Protein of unknown function (DUF3550/UPF0682)
157	5425	AT1G51965	ABO5__ABA Overly-Sensitive 5
158	5442	AT5G49580	Chaperone DnaJ-domain superfamily protein
159	5455	AT5G57670	Protein kinase superfamily protein
160	5489	AT1G30440	Phototropic-responsive NPH3 family protein
161	5505	AT2G02160	AtC3H17_C3H17__CCCH-type zinc finger family protein
162	5519	AT2G04300	Leucine-rich repeat protein kinase family protein
163	5525	AT3G48090	ATEDS1_EDS1__alpha/beta-Hydrolases superfamily protein
164	5591	AT1G54385	SINE1__ARM repeat superfamily protein
165	5628	AT5G23390	Plant protein of unknown function (DUF639)
166	5633	AT2G47940	DEG2_DEGP2_EMB3117__DEGP protease 2
167	5640	AT3G62200	Putative endonuclease or glycosyl hydrolasePutative endonuclease or glycosyl hydrolase
168	5642	AT2G13560	NAD-ME1__NAD-dependent malic enzyme 1
169	5709	AT4G33400	Vacuolar import/degradation, Vid27-related proteinVacuolar import/degradation, Vid27-related protein
170	5799	AT5G27410	D-aminoacid aminotransferase-like PLP-dependent enzymes superfamily protein
171	5812	AT5G53320	Leucine-rich repeat protein kinase family protein
172	5831	AT5G48130	Phototropic-responsive NPH3 family protein
173	5953	AT4G40050	Protein of unknown function (DUF3550/UPF0682)
174	6001	AT1G71360	AtSUN4_SUN4__Galactose-binding protein
175	6003	AT4G23840	Leucine-rich repeat (LRR) family protein
176	6024	AT3G01510	LSF1__like SEX4 1
177	6051	AT5G50380	ATEXO70F1_EXO70F1__exocyst subunit exo70 family protein F1
178	6113	AT4G25450	ABCB28_ATNAP8_NAP8__non-intrinsic ABC protein 8
179	6120	AT4G01270	RING/U-box superfamily protein
180	6312	AT2G34730	myosin heavy chain-related
181	6318	AT2G28250	NCRK__Protein kinase superfamily protein
182	6341	AT1G03010	Phototropic-responsive NPH3 family protein
183	6347	AT1G55590	RNI-like superfamily protein
184	6361	AT5G65530	AtRLCK VI_A3__Protein kinase superfamily protein
185	6570	AT3G55850	LAF3_LAF3 ISF1_LAF3 ISF2__Amidohydrolase family
186	6584	AT3G22960	PKP-ALPHA_PKP1__Pyruvate kinase family protein
187	6712	AT1G54610	Protein kinase superfamily protein
188	6766	AT1G70820	phosphoglucomutase, putative / glucose phosphomutase, putative
189	6775	AT1G16630
190	6810	AT3G13860	HSP60-3A__heat shock protein 60-3A
191	6836	AT4G10890
192	6856	AT4G16650	O-fucosyltransferase family protein
193	6901	AT3G55260	ATHEX2_HEXO1__beta-hexosaminidase 1
194	6907	AT3G08760	ATSIK__Protein kinase superfamily protein
195	6911	AT2G33860	ARF3_ETT__Transcriptional factor B3 family protein / auxin-responsive factor AUX/IAA-related
196	6937	AT3G17770	Dihydroxyacetone kinase
197	6939	AT1G71020	PUB10__ARM repeat superfamily protein
198	6960	AT2G01170	AtGABP_BAT1_GABP__bidirectional amino acid transporter 1
199	6961	AT2G36580	Pyruvate kinase family protein
200	7007	AT5G11580	Regulator of chromosome condensation (RCC1) family protein
201	7092	AT1G64600	methyltransferases;copper ion binding
202	7157	AT5G09420	AtmtOM64_ATTOC64-V_MTOM64_OM64_TOC64-V__translocon at the outer membrane of chloroplasts 64-V
203	7162	AT1G13710	CYP78A5_KLU__cytochrome P450, family 78, subfamily A, polypeptide 5
204	7190	AT5G66130	ATRAD17_RAD17__RADIATION SENSITIVE 17
205	7250	AT3G14170	CORD1__Plant protein of unknown function (DUF936)
206	7309	AT3G10420	SPD1__P-loop containing nucleoside triphosphate hydrolases superfamily protein
207	7327	AT3G50150	Plant protein of unknown function (DUF247)
208	7330	AT3G18770	ATG13B__Autophagy-related protein 13
209	7360	AT1G29200	O-fucosyltransferase family protein
210	7435	AT2G26510	NAT3_PDE135__Xanthine/uracil permease family protein
211	7444	AT1G01930	zinc finger protein-related
212	7445	AT1G75140
213	7497	AT5G56930	EMB1789__CCCH-type zinc finger family protein
214	7515	AT2G26260	3BETAHSD/D2_AT3BETAHSD/D2__3beta-hydroxysteroid-dehydrogenase/decarboxylase isoform 2
215	7559	AT5G11540	AtGulLO3_GulLO3__D-arabinono-1,4-lactone oxidase family protein
216	7577	AT1G09900	Pentatricopeptide repeat (PPR-like) superfamily protein
217	7578	AT2G38970	Zinc finger (C3HC4-type RING finger) family protein
218	7623	AT1G07970
219	7741	AT1G27920	MAP65-8__microtubule-associated protein 65-8
220	7807	AT5G46240	AtKAT1_KAT1__potassium channel in Arabidopsis thaliana 1
221	7819	AT2G30990	Protein of unknown function (DUF688)
222	7838	AT5G27730	Protein of unknown function (DUF1624)
223	8012	AT3G24170	ATGR1_GR1__glutathione-disulfide reductase
224	8053	AT4G20310	S2P__Peptidase M50 family protein
225	8055	AT1G62330	O-fucosyltransferase family protein
226	8085	AT5G27740	EMB161_EMB251_EMB2775_RFC3__ATPase family associated with various cellular activities (AAA)
227	8087	AT1G66345	Pentatricopeptide repeat (PPR) superfamily protein
228	8155	AT5G47380	Protein of unknown function, DUF547
229	8271	AT4G33400	Vacuolar import/degradation, Vid27-related proteinVacuolar import/degradation, Vid27-related protein
230	8344	AT4G00570	NAD-ME2__NAD-dependent malic enzyme 2
231	8509	AT3G58790	GAUT15__galacturonosyltransferase 15
232	8548	AT2G28380	AtDRB2_DRB2__dsRNA-binding protein 2AtDRB2_DRB2__dsRNA-binding protein 2
233	8592	AT3G07990	SCPL27__serine carboxypeptidase-like 27
234	8611	AT4G12540
235	8625	AT3G14330	CREF3__Tetratricopeptide repeat (TPR)-like superfamily protein
236	8700	AT3G17970	atToc64-III_TOC64-III__translocon at the outer membrane of chloroplasts 64-III
237	8701	AT2G20250
238	8796	AT1G04900	Protein of unknown function (DUF185)
239	8862	AT1G30320	Remorin family protein
240	9014	AT2G43210	Ubiquitin-like superfamily proteinUbiquitin-like superfamily protein
241	9045	AT4G39620	ATPPR5_EMB2453__Tetratricopeptide repeat (TPR)-like superfamily protein
242	9057	AT2G36070	ATTIM44-2_TIM44-2__translocase inner membrane subunit 44-2
243	9081	AT4G17740	Peptidase S41 family protein
244	9084	AT2G45910	U-box domain-containing protein kinase family protein
245	9176	AT3G59300	Pentatricopeptide repeat (PPR) superfamily protein
246	9187	AT2G26170	CYP711A1_MAX1__cytochrome P450, family 711, subfamily A, polypeptide 1
247	9267	AT4G32770	ATSDX1_VTE1__tocopherol cyclase, chloroplast / vitamin E deficient 1 (VTE1) / sucrose export defective 1 (SXD1)
248	9324	AT5G60210	RIP5__ROP interactive partner 5
249	9407	AT5G35410	ATSOS2_CIPK24_SNRK3.11_SOS2__Protein kinase superfamily protein
250	9430	AT5G47800	Phototropic-responsive NPH3 family protein
251	9475	AT1G28760	Nemp_A__Uncharacterized conserved protein (DUF2215)
252	9476	AT4G16745	Exostosin family protein
253	9478	AT5G38600	Proline-rich spliceosome-associated (PSP) family protein / zinc knuckle (CCHC-type) family protein
254	9550	AT5G14400	CYP724A1__cytochrome P450, family 724, subfamily A, polypeptide 1
255	9609	AT5G61040
256	9616	AT4G17910	transferases, transferring acyl groups
257	9723	AT4G04320	malonyl-CoA decarboxylase family protein
258	9739	AT1G78910	Pseudouridine synthase family protein
259	9755	AT3G56100	IMK3_MRLK__meristematic receptor-like kinase
260	9771	AT5G08720	HCF145_HCF145_PPP1
261	9823	AT1G77360	APPR6__Tetratricopeptide repeat (TPR)-like superfamily proteinAPPR6__Tetratricopeptide repeat (TPR)-like superfamily protein
262	9827	AT2G40660	Nucleic acid-binding, OB-fold-like protein
263	10200	AT3G03700	Plasma-membrane choline transporter family protein
264	10259	AT1G63940	MDAR6__monodehydroascorbate reductase 6
265	10287	AT4G25835	P-loop containing nucleoside triphosphate hydrolases superfamily protein
266	10293	AT4G16280	FCA__RNA binding;abscisic acid binding
267	10295	AT2G45260	Plant protein of unknown function (DUF641)
268	10364	AT3G09690	alpha/beta-Hydrolases superfamily protein
269	10533	AT3G59670
270	10548	AT1G05030	Major facilitator superfamily protein
271	10562	AT1G08230	Transmembrane amino acid transporter family protein
272	10611	AT2G45500	AAA-type ATPase family protein
273	10651	AT1G05690	BT3__BTB and TAZ domain protein 3
274	10672	AT1G19630	CYP722A1__cytochrome P450, family 722, subfamily A, polypeptide 1
275	10790	AT5G53970	AtTAT1_TAT1_TAT7__Tyrosine transaminase family protein
276	10825	AT5G57740	XBAT32__XB3 ortholog 2 in Arabidopsis thalianaXBAT32__XB3 ortholog 2 in Arabidopsis thaliana
277	11153	AT1G53710	Calcineurin-like metallo-phosphoesterase superfamily protein
278	11222	AT2G32970
279	11231	AT5G08710	RUG1__Regulator of chromosome condensation (RCC1) family protein
280	11267	AT3G02450	cell division protein ftsH, putative
281	11523	AT5G16420	Pentatricopeptide repeat (PPR-like) superfamily protein
282	11524	AT2G39090	APC7_AtAPC7__tetratricopeptide repeat (TPR)-containing protein
283	11526	AT1G66840	PMI2_WEB2__Plant protein of unknown function (DUF827)
284	11556	AT1G67190	F-box/RNI-like superfamily protein
285	11571	AT3G10630	UDP-Glycosyltransferase superfamily protein
286	11617	AT1G05310	Pectin lyase-like superfamily protein
287	11619	AT1G18330	EPR1_RVE7__Homeodomain-like superfamily protein
288	11663	AT3G18610	ATNUC-L2_NUC-L2_NUC2_PARLL1__nucleolin like 2
289	11766	AT5G14020	Endosomal targeting BRO1-like domain-containing protein
290	11770	AT4G34140	D111/G-patch domain-containing protein
291	11832	AT1G80880	Tetratricopeptide repeat (TPR)-like superfamily protein
292	11879	AT2G23093	Major facilitator superfamily protein
293	11932	AT3G18860	transducin family protein / WD-40 repeat family protein
294	11939	AT2G38370	Plant protein of unknown function (DUF827)
295	11991	AT5G67130	PLC-like phosphodiesterases superfamily protein
296	12023	AT1G73850	Protein of unknown function (DUF1666)
297	12039	AT1G53330	Pentatricopeptide repeat (PPR) superfamily protein
298	12041	AT5G58480	O-Glycosyl hydrolases family 17 protein
299	12208	AT1G23070	Protein of unknown function (DUF300)
300	12216	AT4G29890	choline monooxygenase, putative (CMO-like)
301	12292	AT1G77360	APPR6__Tetratricopeptide repeat (TPR)-like superfamily proteinAPPR6__Tetratricopeptide repeat (TPR)-like superfamily protein
302	12385	AT1G80550	Pentatricopeptide repeat (PPR) superfamily protein
303	12412	AT5G47510	Sec14p-like phosphatidylinositol transfer family protein
304	12415	AT5G61200
305	12423	AT2G33260	Tryptophan/tyrosine permease
306	12450	AT1G26870	ANAC009_FEZ__NAC (No Apical Meristem) domain transcriptional regulator superfamily protein
307	12571	AT4G28300	Protein of unknown function (DUF1421)
308	12575	AT5G61930	APO3__Arabidopsis thaliana protein of unknown function (DUF794)
309	12658	AT5G57830	Protein of unknown function, DUF593
310	12706	AT3G58060	MTP8__Cation efflux family protein
311	12776	AT5G44150
312	12779	AT5G07170	Cell cycle regulated microtubule associated protein
313	12786	AT2G36630	Sulfite exporter TauE/SafE family protein
314	12916	AT5G18260	RING/U-box superfamily protein
315	12921	AT5G57740	XBAT32__XB3 ortholog 2 in Arabidopsis thalianaXBAT32__XB3 ortholog 2 in Arabidopsis thaliana
316	12951	AT3G25440	RNA-binding CRS1 / YhbY (CRM) domain protein
317	13007	AT5G18950	Tetratricopeptide repeat (TPR)-like superfamily protein
318	13012	AT5G40610	GPDHp__NAD-dependent glycerol-3-phosphate dehydrogenase family protein
319	13021	AT3G09180	MED3
320	13140	AT4G00330	CRCK2__calmodulin-binding receptor-like cytoplasmic kinase 2
321	13170	AT1G56145	Leucine-rich repeat transmembrane protein kinase
322	13219	AT3G61350	SKIP4__SKP1 interacting partner 4
323	13236	AT3G52170	DNA binding
324	13256	AT5G09450	Tetratricopeptide repeat (TPR)-like superfamily protein
325	13259	AT1G49350	pfkB-like carbohydrate kinase family protein
326	13290	AT1G78915	Tetratricopeptide repeat (TPR)-like superfamily protein
327	13342	AT1G52540	Protein kinase superfamily protein
328	13343	AT1G36310	AtTRM9_TRM9__S-adenosyl-L-methionine-dependent methyltransferases superfamily protein
329	13388	AT4G18160	ATKCO6_ATTPK3_KCO6_TPK3__Ca2+ activated outward rectifying K+ channel 6
330	13463	AT1G27060	Regulator of chromosome condensation (RCC1) family protein
331	13466	AT5G27650	Tudor/PWWP/MBT superfamily protein
332	13472	AT5G47790	SMAD/FHA domain-containing protein
333	13569	AT5G24760	GroES-like zinc-binding dehydrogenase family protein
334	13620	AT3G48530	KINγ_KING1__SNF1-related protein kinase regulatory subunit gamma 1
335	13637	AT2G22720	SPT2 chromatin protein
336	13677	AT1G70180	Sterile alpha motif (SAM) domain-containing protein
337	13693	AT1G09060	JMJ24__Zinc finger, RING-type;Transcription factor jumonji/aspartyl beta-hydroxylaseJMJ24__Zinc finger, RING-type;Transcription factor jumonji/aspartyl beta-hydroxylaseJMJ24__Zinc finger, RING-type;Transcription factor jumonji/aspartyl beta-hydroxylase
338	13819	AT1G67570	Protein of unknown function (DUF3537)
339	13943	AT1G18030	Protein phosphatase 2C family protein
340	13945	AT5G41890	GDSL-like Lipase/Acylhydrolase superfamily protein
341	13955	AT5G03470	ATB' ALPHA__Protein phosphatase 2A regulatory B subunit family protein
342	14111	AT1G77020	DNAJ heat shock N-terminal domain-containing protein
343	14134	AT1G75900	GDSL-like Lipase/Acylhydrolase superfamily protein
344	14142	AT1G64890	Major facilitator superfamily protein
345	14177	AT1G47310
346	14246	AT1G73380
347	14457	AT1G29670	GDSL-like Lipase/Acylhydrolase superfamily protein
348	14532	AT2G30820
349	14572	AT1G65280	DNAJ heat shock N-terminal domain-containing protein
350	14709	AT1G30540	GNK__Actin-like ATPase superfamily proteinGNK__Actin-like ATPase superfamily protein
351	14787	AT2G20980	MCM10__minichromosome maintenance 10
352	14851	AT3G48880	RNI-like superfamily protein
353	14889	AT3G10150	ATPAP16_PAP16__purple acid phosphatase 16
354	14912	AT1G24030	Protein kinase superfamily protein
355	14940	AT1G74240	Mitochondrial substrate carrier family protein
356	14948	AT5G19950	Domain of unknown function (DUF1767)
357	15027	AT1G71070	Core-2/I-branching beta-1,6-N-acetylglucosaminyltransferase family protein
358	15039	AT2G39840	TOPP4__type one serine/threonine protein phosphatase 4
359	15173	AT1G58430	RXF26__GDSL-like Lipase/Acylhydrolase family protein
360	15223	AT5G50600	ATHSD1_HSD1__hydroxysteroid dehydrogenase 1
361	15242	AT1G74460	GDSL-like Lipase/Acylhydrolase superfamily protein
362	15247	AT5G55050	GDSL-like Lipase/Acylhydrolase superfamily protein
363	15370	AT5G61540	N-terminal nucleophile aminohydrolases (Ntn hydrolases) superfamily protein
364	15377	AT1G62305	Core-2/I-branching beta-1,6-N-acetylglucosaminyltransferase family protein
365	15418	AT3G29090	ATPME31_PME31__pectin methylesterase 31
366	15454	AT3G26700	Protein kinase superfamily protein
367	15519	AT5G14530	APRF1__Transducin/WD40 repeat-like superfamily protein
368	15547	AT2G28380	AtDRB2_DRB2__dsRNA-binding protein 2AtDRB2_DRB2__dsRNA-binding protein 2
369	15621	AT1G30540	GNK__Actin-like ATPase superfamily proteinGNK__Actin-like ATPase superfamily protein
370	15696	AT4G31640	transcriptional factor B3 family protein
371	15700	AT5G13290	CRN_SOL2__Protein kinase superfamily protein
372	15741	AT3G56590	hydroxyproline-rich glycoprotein family protein
373	15808	AT5G19970
374	15923	AT3G61440	ARATH;BSAS3;1_ATCYSC1_CYSC1__cysteine synthase C1
375	15954	AT5G67170	SEC-C motif-containing protein / OTU-like cysteine protease family protein
376	15962	AT5G59210	myosin heavy chain-related
377	16240	AT2G20410	RNA-binding ASCH domain protein
378	16367	AT4G17980	anac071_NAC071__NAC domain containing protein 71
379	16469	AT5G01670	NAD(P)-linked oxidoreductase superfamily protein
380	16591	AT5G58660	2-oxoglutarate (2OG) and Fe(II)-dependent oxygenase superfamily protein
381	16720	AT1G05577	Domain of unknown function (DUF966)Domain of unknown function (DUF966)
382	16857	AT1G28410
383	16861	AT1G67170
384	16901	AT3G20260	Protein of unknown function (DUF1666)
385	17106	AT1G18190	GC2__golgin candidate 2GC2__golgin candidate 2
386	17113	AT1G68540	CCRL6_TKPR2__NAD(P)-binding Rossmann-fold superfamily protein
387	17193	AT2G16860	GCIP-interacting family protein
388	17228	AT5G55590	QRT1__Pectin lyase-like superfamily protein
389	17341	AT5G47760	ATPGLP2_ATPK5_PGLP2_PGLP2__2-phosphoglycolate phosphatase 2
390	17358	AT4G06598
391	17530	AT1G22970
392	17537	AT1G05440	C-8 sterol isomerases
393	17616	AT5G12380	ANNAT8__annexin 8
394	17647	AT3G56170	CAN_CAN1__Ca-2+ dependent nuclease
395	17657	AT5G67290	FAD-dependent oxidoreductase family protein
396	17802	AT3G24040	Core-2/I-branching beta-1,6-N-acetylglucosaminyltransferase family protein
397	17828	AT2G17640	ATSERAT3;1_SAT-106__Trimeric LpxA-like enzymes superfamily protein
398	17857	AT4G12690	Plant protein of unknown function (DUF868)Plant protein of unknown function (DUF868)
399	17886	AT1G76940	RNA-binding (RRM/RBD/RNP motifs) family protein
400	17918	AT3G46110	Domain of unknown function (DUF966)
401	17972	AT2G38750	ANNAT4_AtANN4__annexin 4
402	18027	AT5G50290
403	18047	AT3G22430
404	18090	AT3G52290	IQD3__IQ-domain 3
405	18098	AT5G43650	BHLH92__basic helix-loop-helix (bHLH) DNA-binding superfamily protein
406	18202	AT4G14750	IQD19__IQ-domain 19
407	18236	AT5G22050	Protein kinase superfamily protein
408	18329	AT5G47500	PME5__Pectin lyase-like superfamily protein
409	18424	AT5G18440	AtNUFIP_NUFIP
410	18586	AT2G23520	Pyridoxal phosphate (PLP)-dependent transferases superfamily protein
411	18627	AT2G21610	ATPE11_PE11__pectinesterase 11
412	18628	AT1G13635	DNA glycosylase superfamily protein
413	18632	AT1G64385
414	18667	AT3G04880	DRT102__DNA-damage-repair/toleration protein (DRT102)
415	18978	AT5G44450	methyltransferases
416	19020	AT2G39650	Protein of unknown function (DUF506)
417	19182	AT4G35000	APX3__ascorbate peroxidase 3
418	19231	AT4G01560	MEE49__Ribosomal RNA processing Brix domain protein
419	19297	AT5G38900	Thioredoxin superfamily protein
420	19393	AT4G12690	Plant protein of unknown function (DUF868)Plant protein of unknown function (DUF868)
421	19399	AT4G10340	LHCB5__light harvesting complex of photosystem II 5
422	19628	AT1G76570	AtLHCB7_LHCB7__Chlorophyll A-B binding family protein
423	19713	AT3G57180	BPG2_YL1__P-loop containing nucleoside triphosphate hydrolases superfamily protein
424	19792	AT1G15215	DTF1_SHH1
425	19834	AT2G38270	ATGRX2_AtGRXS16_CXIP2__CAX-interacting protein 2
426	19837	AT1G03180
427	19851	AT2G44510	CDK inhibitor P21 binding protein
428	19891	AT5G10870	ATCM2_CM2__chorismate mutase 2ATCM2_CM2__chorismate mutase 2
429	19955	AT1G72790	hydroxyproline-rich glycoprotein family protein
430	20145	AT3G12710	DNA glycosylase superfamily protein
431	20191	AT3G47830	DNA glycosylase superfamily protein
432	20232	AT2G26210	Ankyrin repeat family protein
433	20245	AT3G11150	2-oxoglutarate (2OG) and Fe(II)-dependent oxygenase superfamily protein
434	20255	AT4G02485	2-oxoglutarate (2OG) and Fe(II)-dependent oxygenase superfamily protein
435	20284	AT1G18600	AtPARL_ATRBL12_PARL_RBL12__RHOMBOID-like protein 12
436	20375	AT5G07910	Leucine-rich repeat (LRR) family protein
437	20388	AT1G68150	ATWRKY9_WRKY9__WRKY DNA-binding protein 9
438	20425	AT5G22040
439	20541	AT4G15790
440	20578	AT2G19270
441	20609	AT5G14090	AtLAZY1_LAZY1
442	20638	AT2G27800	Tetratricopeptide repeat (TPR)-like superfamily protein
443	20656	AT3G59520	ATRBL12_ATRBL13_RBL12_RBL13__RHOMBOID-like protein 13
444	20668	AT5G15330	ATSPX4_SPX4__SPX domain gene 4
445	20694	AT1G72490	AtNGR2_DRO1_LAZY4
446	20799	AT3G13890	ATMYB26_MS35_MYB26__myb domain protein 26
447	20812	AT1G68810	ABS5_T5L1__basic helix-loop-helix (bHLH) DNA-binding superfamily protein
448	20873	AT3G16565	alanine-tRNA ligases;nucleic acid binding;ligases, forming aminoacyl-tRNA and related compounds;nucleotide binding;ATP binding
449	20923	AT1G77405	Pentatricopeptide repeat (PPR) superfamily protein
450	20971	AT2G42080	BIL2__Chaperone DnaJ-domain superfamily proteinBIL2__Chaperone DnaJ-domain superfamily protein
451	20988	AT3G20270	LBR-2__lipid-binding serum glycoprotein family protein
452	21028	AT5G12870	ATMYB46_MYB46__myb domain protein 46
453	21038	AT1G45474	Lhca5__photosystem I light harvesting complex gene 5
454	21161	AT2G37110	PLAC8 family protein
455	21211	AT3G02940	AtMYB107_MYB107__myb domain protein 107
456	21332	AT5G07950
457	21418	AT4G23895	Pleckstrin homology (PH) domain-containing protein
458	21566	AT1G21840	UREF__urease accessory protein F
459	21770	AT4G30993	Calcineurin-like metallo-phosphoesterase superfamily protein
460	22046	AT5G62840	Phosphoglycerate mutase family protein
461	22186	AT2G42080	BIL2__Chaperone DnaJ-domain superfamily proteinBIL2__Chaperone DnaJ-domain superfamily protein
462	22218	AT5G10870	ATCM2_CM2__chorismate mutase 2ATCM2_CM2__chorismate mutase 2
463	22224	AT1G11545	XTH8__xyloglucan endotransglucosylase/hydrolase 8
464	22265	AT3G51580
465	22283	AT5G58280	AP2/B3-like transcriptional factor family protein
466	22409	AT3G19910	RING/U-box superfamily proteinRING/U-box superfamily protein
467	22471	AT3G08490
468	22486	AT4G15030
469	22615	AT3G18550	AtBRC1_ATTCP18_BRC1_TCP18__TCP family transcription factor
470	22628	AT1G14340	RNA-binding (RRM/RBD/RNP motifs) family protein
471	22710	AT5G08080	ATSYP132_SYP132__syntaxin of plants 132
472	22795	AT5G11680
473	22828	AT3G44910	ATCHX12_CHX12__cation/H+ exchanger 12
474	22862	AT3G54300	ATVAMP727_VAMP727_VAMP727__vesicle-associated membrane protein 727
475	22872	AT1G20990	Cysteine/Histidine-rich C1 domain family protein
476	22903	AT1G02330	CSU2
477	23005	AT4G18370	DEG5_DEGP5_HHOA__DEGP protease 5
478	23047	AT1G14730	Cytochrome b561/ferric reductase transmembrane protein family
479	23083	AT5G66870	ASL1_LBD36__ASYMMETRIC LEAVES 2-like 1
480	23160	AT4G39670	Glycolipid transfer protein (GLTP) family protein
481	23170	AT2G27430	ARM repeat superfamily protein
482	23210	AT1G79760	DTA4__downstream target of AGL15-4
483	23304	AT3G60810
484	23359	AT5G10860	CBSX3__Cystathionine beta-synthase (CBS) family protein
485	23378	AT5G02050	Mitochondrial glycoprotein family protein
486	23446	AT4G22758
487	23479	AT2G16050	Cysteine/Histidine-rich C1 domain family protein
488	23541	AT4G34960	Cyclophilin-like peptidyl-prolyl cis-trans isomerase family protein
489	23606	AT4G26410	RHIP1__Uncharacterised conserved protein UCP022280
490	24219	AT4G21330	DYT1__basic helix-loop-helix (bHLH) DNA-binding superfamily protein
491	24224	AT4G26490	Late embryogenesis abundant (LEA) hydroxyproline-rich glycoprotein family
492	24273	AT3G62690	ATL5__AtL5
493	24309	AT2G03630
494	24387	AT2G36330	CASPL4A3__Uncharacterised protein family (UPF0497)
495	24623	AT4G09040	RNA-binding (RRM/RBD/RNP motifs) family protein
496	24625	AT4G10170	SNARE-like superfamily protein
497	24858	AT2G38730	Cyclophilin-like peptidyl-prolyl cis-trans isomerase family protein
498	24926	AT5G62460	RZFP__RING/FYVE/PHD zinc finger superfamily protein
499	24958	AT5G37478	TPX2 (targeting protein for Xklp2) protein family
500	25032	AT5G49800	Polyketide cyclase/dehydrase and lipid transport superfamily protein
501	25129	AT3G59090	Cand3
502	25177	AT4G22370
503	25239	AT5G60910	AGL8_FUL__AGAMOUS-like 8
504	25325	AT5G49320	Protein of unknown function (DUF1218)
505	25364	AT1G30480	DRT111_RSN2_SFPS__D111/G-patch domain-containing protein
506	25429	AT1G02180	ferredoxin-related
507	25494	AT3G07150
508	25543	AT3G07570	Cytochrome b561/ferric reductase transmembrane with DOMON related domain
509	25587	AT5G54980	CASPL2D1__Uncharacterised protein family (UPF0497)
510	25589	AT2G20230	Tetraspanin family protein
511	25671	AT3G19910	RING/U-box superfamily proteinRING/U-box superfamily protein
512	25678	AT2G28420	GLYI8__Lactoylglutathione lyase / glyoxalase I family protein
513	26011	AT2G18196	Heavy metal transport/detoxification superfamily protein
514	26191	AT4G19830	FKBP-like peptidyl-prolyl cis-trans isomerase family protein
515	26198	AT2G45060	Uncharacterised conserved protein UCP022280
516	26376	AT1G32470	Single hybrid motif superfamily protein
517	26564	AT3G09925	Pollen Ole e 1 allergen and extensin family protein
518	26649	AT3G11260	WOX5_WOX5B__WUSCHEL related homeobox 5
519	26767	AT1G06330	Heavy metal transport/detoxification superfamily protein
520	26861	AT3G06760	Drought-responsive family protein
521	26910	AT5G10890	myosin heavy chain-related
522	26947	AT1G24020	MLP423__MLP-like protein 423
523	27096	AT1G29520	AWPM-19-like family protein
524	27166	AT5G54850
525	27270	AT4G28820	HIT-type Zinc finger family protein
526	27637	AT1G71910
527	27661	AT2G24030	zinc ion binding;nucleic acid binding
528	27662	AT3G48120
529	27686	AT3G47490	HNH endonuclease
530	27752	AT5G46940	Plant invertase/pectin methylesterase inhibitor superfamily protein
531	27906	AT1G73440	calmodulin-related
532	27993	AT5G26230	MAKR1
533	28076	AT3G51500
534	28154	AT3G51380	IQD20__IQ-domain 20
535	28478	AT1G05785	Got1/Sft2-like vescicle transport protein family
536	28566	AT1G80860	ATPLMT_PLMT__phospholipid N-methyltransferase
537	28767	AT2G36930	zinc finger (C2H2 type) family protein
538	28913	AT2G35010	ATO1_TO1__thioredoxin O1
539	29054	AT2G32090	Lactoylglutathione lyase / glyoxalase I family protein
540	29123	AT4G21215
541	29170	AT2G01755
542	29283	AT5G48910	LPA66__Pentatricopeptide repeat (PPR) superfamily protein
543	29425	AT5G55640
544	29435	AT2G32280	VCC__Protein of unknown function (DUF1218)
545	29478	AT1G49405	CASPL5C3__Uncharacterised protein family (UPF0497)
546	29495	AT3G06220	AP2/B3-like transcriptional factor family protein
547	29957	AT5G64080	AtXYP1_XYP1__Bifunctional inhibitor/lipid-transfer protein/seed storage 2S albumin superfamily protein
548	29991	AT5G44550	CASPL1B1__Uncharacterised protein family (UPF0497)
549	30180	AT2G02850	ARPN__plantacyanin
550	30226	AT2G17710
551	30242	AT3G54900	ATGRXCP_AtGRXS14_CXIP1__CAX interacting protein 1
552	30316	AT1G73885
553	30426	AT2G37030	SAUR46__SAUR-like auxin-responsive protein family
554	30756	AT2G21180
555	30939	AT2G33855
556	31007	AT4G31805	POLAR__WRKY family transcription factor
557	31128	AT1G55080	MED9
558	31184	AT3G19550
559	31342	AT2G14045
560	31711	AT3G17520	Late embryogenesis abundant protein (LEA) family protein
561	31885	AT5G45660
562	32156	AT2G33450	PRPL28__Ribosomal L28 family
563	32248	AT4G16400
564	32291	AT4G20720	dentin sialophosphoprotein-related
565	32949	AT5G12370	SEC10__exocyst complex component sec10
566	33195	AT4G08230	glycine-rich protein
567	33462	AT5G22875
568	33714	AT4G09890	Protein of unknown function (DUF3511)
569	34290	AT5G05220
570	34648	AT1G49245	Prefoldin chaperone subunit family protein
571	34741	AT1G75717
572	35318	AT1G08580
573	35691	AT1G67785
574	35779	AT1G16916

## Sheet: Supplemental_Table_S7
Supplemental Table S7. Orthogroup summary (OG) comparing Wolffia, Spirodela and PLAZA monocot proteomes.
	sp9509	sp7498	wa7733	wa8730	aco	ath	atr	bdi	cre	egu	hvu	mac	mco	mpo	obr	osa	osaindica	oth	pab	ped	peq	ppa	ptr	sbi	sit	sly	smo	tae	vvi	zjn	zma	zosmarina
Number of genes	16864	19623	14610	13701	27024	27615	26846	34310	17741	23610	24282	36528	10102	19287	32037	42189	38714	28446	66632	31986	29415	32926	42950	34211	34584	34725	22285	103537	26346	53561	39498	20450
Number of genes in orthogroups	16120	18215	14200	13430	22827	24199	19316	28396	8758	22967	23322	30497	6858	13049	25863	32948	30540	23511	41394	29296	22910	21532	35596	28839	30816	28076	16626	96027	22113	31975	35628	18459
Number of unassigned genes	744	1408	410	271	4197	3416	7530	5914	8983	643	960	6031	3244	6238	6174	9241	8174	4935	25238	2690	6505	11394	7354	5372	3768	6649	5659	7510	4233	21586	3870	1991
Percentage of genes in orthogroups	95.6	92.8	97.2	98	84.5	87.6	72	82.8	49.4	97.3	96	83.5	67.9	67.7	80.7	78.1	78.9	82.7	62.1	91.6	77.9	65.4	82.9	84.3	89.1	80.9	74.6	92.7	83.9	59.7	90.2	90.3
Percentage of unassigned genes	4.4	7.2	2.8	2	15.5	12.4	28	17.2	50.6	2.7	4	16.5	32.1	32.3	19.3	21.9	21.1	17.3	37.9	8.4	22.1	34.6	17.1	15.7	10.9	19.1	25.4	7.3	16.1	40.3	9.8	9.7
Number of orthogroups containing species	9041	9748	8491	8333	9958	9377	9631	11267	6022	9071	10218	9522	5440	8272	11595	12954	12100	10904	10870	9931	9754	8598	10337	11408	11550	10005	7948	12370	9501	11432	11203	8648
Percentage of orthogroups containing species	35.8	38.6	33.7	33	39.5	37.2	38.2	44.7	23.9	36	40.5	37.7	21.6	32.8	46	51.3	48	43.2	43.1	39.4	38.7	34.1	41	45.2	45.8	39.7	31.5	49	37.7	45.3	44.4	34.3
Number of species-specific orthogroups	1	1	0	0	53	48	58	10	75	6	14	10	18	54	11	24	15	27	271	9	67	131	78	10	17	74	102	118	17	55	49	33
Number of genes in species-specific orthogroups	2	2	0	0	406	336	357	39	372	21	31	28	51	374	32	61	75	70	1477	20	366	641	345	57	85	450	538	599	59	244	155	223
Percentage of genes in species-specific orthogroups	0	0.2	0	0	1.5	1.2	1.3	0.1	2.1	0.1	0.1	0.1	0.5	1.9	0.1	0.1	0.2	0.2	2.2	0.1	1.2	1.9	0.8	0.2	0.2	1.3	2.4	0.6	0.2	0.5	0.4	1.1
Abbreviations: cre,Chlamydomonas reinhardtii ; mco,Micromonas commoda;smo,Selaginella moellendorffii ; atr,Amborella trichopoda; sly,Solanum lycopersicum; vvi,Vitis vinifera;ptr,Populus trichocarpa; ath,Arabidopsis thaliana; pab,Picea abies; mpo,Marchantia polymorpha; sp9509,Spirodela polyrhiza; sp7498,Spirodela polyrhiza; wa7733,Wolffia australiana; wa8730,Wolffia australiana; bdi,Brachypodium d…

## Sheet: Supplemental_Table_S8
Supplemental Table S8. Wolffia unique orthogroup (OG) Gene Ontology (GO) terms.
	odds_ratio_left	p_value_left	fdr_left	odds_ratio_right	p_value_right	fdr_right	Orthogroup name
GO:0042284	306.154	7.19203e-28	8.56571e-24	0	1	1	sphingolipid delta-4 desaturase activity
GO:0046520	77.3214	1.59986e-20	9.52717e-17	0.0996139	1	1	sphingoid biosynthetic process
GO:0046519	51.4887	2.64103e-18	1.04849e-14	0.0670729	1	1	sphingoid metabolic process
GO:0046658	10.4975	6.58205e-15	1.9598e-11	0.798428	0.999851	1	anchored component of plasma membrane
GO:0030148	25.1438	2.07297e-14	4.93782e-11	0.111291	1	1	sphingolipid biosynthetic process
GO:0031225	8.80992	1.79394e-13	3.56097e-10	0.911529	0.954847	1	anchored component of membrane
GO:0097164	19.5464	4.66728e-13	7.94105e-10	0.707485	0.999122	1	ammonium ion metabolic process
GO:0016705	7.61341	2.674e-12	3.59572e-09	1.46541	1.90934e-17	2.68164e-16	oxidoreductase activity, acting on paired donors, with incorporation or reduction of molecular oxygen
GO:0006665	16.9313	2.71717e-12	3.59572e-09	0.752373	0.997525	1	sphingolipid metabolic process
GO:0047196	69.2788	2.28058e-11	2.71617e-08	0.224829	0.999966	1	long-chain-alcohol O-fatty-acyltransferase activity
GO:0044425	2.748	3.17588e-11	3.43861e-08	0.869548	1	1	membrane part
GO:0010025	15.7691	4.13777e-11	4.10673e-08	0.488848	1	1	wax biosynthetic process
GO:0010166	15.141	6.53076e-11	5.98318e-08	0.468647	1	1	wax metabolic process
GO:0009640	12.3318	1.26099e-10	1.00123e-07	0.354681	1	1	photomorphogenesis
GO:1901570	14.3413	1.19899e-10	1.00123e-07	0.457958	1	1	fatty acid derivative biosynthetic process
GO:0005794	3.23262	1.45682e-10	1.08442e-07	0.703058	1	1	Golgi apparatus
GO:1900057	19.5318	2.27558e-10	1.59425e-07	0.628071	0.999822	1	positive regulation of leaf senescence
GO:0031226	4.68614	2.81576e-10	1.74914e-07	1.38008	1.94893e-23	3.39353e-22	intrinsic component of plasma membrane
GO:1905623	19.0825	2.83663e-10	1.74914e-07	0.61291	0.999919	1	positive regulation of leaf development
GO:0012505	2.34593	2.93726e-10	1.74914e-07	0.844828	1	1	endomembrane system
GO:0046467	10.4344	9.19931e-10	5.21732e-07	0.10237	1	1	membrane lipid biosynthetic process
GO:1901568	9.75687	8.35603e-09	4.52365e-06	0.392912	1	1	fatty acid derivative metabolic process
GO:0004144	28.2898	9.66587e-09	5.00524e-06	0.660947	0.988849	1	diacylglycerol O-acyltransferase activity
GO:0005618	3.39959	1.10251e-08	5.1829e-06	1.35597	3.30108e-33	8.99678e-32	cell wall
GO:0030312	3.39809	1.11335e-08	5.1829e-06	1.3553	4.12503e-33	1.11911e-31	external encapsulating structure
GO:0044459	3.78122	1.13145e-08	5.1829e-06	1.3865	1.79883e-30	4.34564e-29	plasma membrane part
GO:0006643	8.34658	1.24668e-08	5.49926e-06	0.463081	1	1	membrane lipid metabolic process
GO:0016411	26.165	1.63268e-08	6.94471e-06	0.609078	0.997141	1	acylglycerol O-acyltransferase activity
GO:0005789	4.23418	1.80278e-08	7.40383e-06	0.585321	1	1	endoplasmic reticulum membrane
GO:0042175	4.18423	2.22645e-08	8.83902e-06	0.625098	1	1	nuclear outer membrane-endoplasmic reticulum membrane network
GO:0098827	4.15559	2.51486e-08	9.66194e-06	0.580845	1	1	endoplasmic reticulum subcompartment
GO:1900055	11.6768	2.78766e-08	1.03753e-05	0.389626	1	1	regulation of leaf senescence
GO:0009505	4.73441	5.57367e-08	2.01159e-05	1.70462	1.89685e-49	1.20168e-47	plant-type cell wall
GO:0008610	3.68567	6.18503e-08	2.16658e-05	1.11054	0.000396494	0.00237061	lipid biosynthetic process
GO:0045141	103.967	1.02295e-07	3.12393e-05	0	1	1	meiotic telomere clustering
GO:0044821	103.967	1.02295e-07	3.12393e-05	0	1	1	meiotic telomere tethering at nuclear periphery
GO:0070197	103.967	1.02295e-07	3.12393e-05	0	1	1	meiotic attachment of telomere to nuclear envelope
GO:0090220	103.967	1.02295e-07	3.12393e-05	0	1	1	chromosome localization to nuclear envelope involved in homologous chromosome segregation
GO:0097240	103.967	1.02295e-07	3.12393e-05	0	1	1	chromosome attachment to the nuclear envelope
GO:0044432	3.7876	1.27127e-07	3.7852e-05	0.563722	1	1	endoplasmic reticulum part
GO:0019432	17.6963	2.21288e-07	6.42814e-05	0.469007	0.999999	1	triglyceride biosynthetic process
GO:0009639	5.2425	3.83271e-07	0.000106157	0.449717	1	1	response to red or far red light
GO:0005783	2.59739	3.76035e-07	0.000106157	0.779697	1	1	endoplasmic reticulum
GO:0046460	15.7123	4.84875e-07	0.00012833	0.414745	1	1	neutral lipid biosynthetic process
GO:0046463	15.7123	4.84875e-07	0.00012833	0.414745	1	1	acylglycerol biosynthetic process
GO:0016491	2.60256	7.26544e-07	0.000188112	1.33135	3.10798e-42	1.31619e-40	oxidoreductase activity
GO:0006723	59.0321	9.03356e-07	0.000228914	0.612416	0.931905	1	cuticle hydrocarbon biosynthetic process
GO:0043446	54.4202	1.23701e-06	0.00030067	0.563423	0.959485	1	cellular alkane metabolic process
GO:0043447	54.4202	1.23701e-06	0.00030067	0.563423	0.959485	1	alkane biosynthetic process
GO:2000024	7.23167	2.06062e-06	0.000490839	0.330763	1	1	regulation of leaf development
GO:0006641	11.7349	3.25113e-06	0.000741812	0.473335	1	1	triglyceride metabolic process
GO:0034398	42.2168	3.3011e-06	0.000741812	0	1	1	telomere tethering at nuclear periphery
GO:0034397	42.2168	3.3011e-06	0.000741812	0	1	1	telomere localization
GO:0055114	2.34522	3.77081e-06	0.000831673	1.23628	6.60704e-27	1.30066e-25	oxidation-reduction process
GO:0090435	40.2646	3.96388e-06	0.00085836	0.114984	0.999999	1	protein localization to nuclear envelope
GO:0010029	6.63401	4.357e-06	0.00092664	0.628539	1	1	regulation of seed germination
GO:0051240	4.49991	5.20244e-06	0.00105019	0.895017	0.98905	1	positive regulation of multicellular organismal process
GO:1902047	37.6528	5.13613e-06	0.00105019	0	1	1	polyamine transmembrane transport
GO:0015203	37.6528	5.13613e-06	0.00105019	0	1	1	polyamine transmembrane transporter activity
GO:0008374	7.26838	6.34676e-06	0.00125983	1.39053	8.66445e-07	6.31153e-06	O-acyltransferase activity
GO:1900140	6.30275	6.76562e-06	0.00132096	0.60356	1	1	regulation of seedling development
GO:2000769	33.329	8.22453e-06	0.0015799	2.77138	2.42352e-08	1.95955e-07	regulation of establishment or maintenance of cell polarity regulating cell shape
GO:0015846	31.6625	1.00232e-05	0.00189486	0	1	1	polyamine transport
GO:0006629	2.51217	1.1578e-05	0.00212144	1.09254	0.000116457	0.00072677	lipid metabolic process
GO:0051094	4.18558	1.15518e-05	0.00212144	0.84773	0.999747	1	positive regulation of developmental process
GO:0051187	9.51048	1.2481e-05	0.00225226	0.363934	1	1	cofactor catabolic process
GO:0032050	29.0239	1.40141e-05	0.00249117	1.51867	0.0216498	0.106903	clathrin heavy chain binding
GO:0048235	11.5088	1.82589e-05	0.00319799	1.86614	1.16344e-10	1.10148e-09	pollen sperm cell differentiation
GO:0043495	26.4857	1.99258e-05	0.00339549	0.15302	1	1	protein membrane anchor
GO:0006639	8.76519	2.08968e-05	0.00339549	0.357714	1	1	acylglycerol metabolic process
GO:0006638	8.76519	2.08968e-05	0.00339549	0.357714	1	1	neutral lipid metabolic process
GO:0030513	348.235	2.16673e-05	0.00339549	0	1	1	positive regulation of BMP signaling pathway
GO:0060384	348.235	2.16673e-05	0.00339549	0	1	1	innervation
GO:0008045	348.235	2.16673e-05	0.00339549	0	1	1	motor neuron axon guidance
GO:0021675	348.235	2.16673e-05	0.00339549	0	1	1	nerve development
GO:0048219	348.235	2.16673e-05	0.00339549	0	1	1	inter-Golgi cisterna vesicle-mediated transport
GO:0031224	2.40501	3.42136e-05	0.00529201	0.882486	1	1	intrinsic component of membrane
GO:0006897	6.50854	4.43263e-05	0.00676828	1.30661	7.36891e-05	0.000468323	endocytosis
GO:0016688	44.2705	5.17805e-05	0.00770882	0.808484	0.775123	1	L-ascorbate peroxidase activity
GO:0009416	2.39074	5.13707e-05	0.00770882	0.855481	1	1	response to light stimulus
GO:0016020	1.50347	6.47849e-05	0.00952578	1.246	4.35862e-118	1.15358e-115	membrane
GO:0044255	2.4443	6.76643e-05	0.00982782	1.08593	0.000642204	0.00376596	cellular lipid metabolic process
GO:0046621	18.7755	7.42883e-05	0.0106599	0.906672	0.724794	1	negative regulation of organ growth
GO:0048556	165.826	8.27093e-05	0.011727	105.643	2.54034e-20	4.06113e-19	microsporocyte nucleus
GO:0009506	2.22389	9.58244e-05	0.0132706	1.42351	1.88883e-63	1.71725e-61	plasmodesma
GO:0055044	2.22389	9.58244e-05	0.0132706	1.42351	1.88883e-63	1.71725e-61	symplast
GO:0005911	2.19709	0.000117145	0.0160368	1.46165	7.73149e-75	9.11703e-73	cell-cell junction
GO:0051291	16.3899	0.000124399	0.0168363	0.191182	1	1	protein heterooligomerization
GO:0030054	2.1787	0.000134511	0.0178004	1.46075	3.45987e-75	4.1207e-73	cell junction
GO:0098657	5.53397	0.000133944	0.0178004	1.78724	1.0912e-22	1.86458e-21	import into cell
GO:0006787	14.9799	0.0001747	0.0223729	0.286826	1	1	porphyrin-containing compound catabolic process
GO:0033015	14.9799	0.0001747	0.0223729	0.286826	1	1	tetrapyrrole catabolic process
GO:0009314	2.21378	0.000174501	0.0223729	0.840898	1	1	response to radiation
GO:0048555	102.422	0.000204935	0.0259657	14.0857	1.73299e-13	2.00777e-12	generative cell nucleus
GO:0009783	99.4955	0.000216563	0.0271501	0	1	1	photosystem II antenna complex
GO:0016784	96.7317	0.000228507	0.0283491	0.271923	0.972698	1	3-mercaptopyruvate sulfurtransferase activity
GO:0071944	1.57234	0.000236068	0.0289853	1.49113	2.20596e-279	2.6273e-276	cell periphery
GO:2000117	13.6582	0.000247203	0.0300427	0.365116	1	1	negative regulation of cysteine-type endopeptidase activity
GO:0008419	91.6406	0.000253342	0.0304778	0	1	1	RNA lariat debranching enzyme activity
GO:0005886	1.6169	0.000278831	0.0332088	1.50689	1.15936e-251	1.25527e-248	plasma membrane
GO:0004869	12.9473	0.000301949	0.0344703	3.85015	7.15737e-36	2.1048e-34	cysteine-type endopeptidase inhibitor activity
GO:0031624	12.9956	0.000297775	0.0344703	1.00407	0.510941	1	ubiquitin conjugating enzyme binding
GO:0046104	82.9129	0.000306789	0.0344703	0	1	1	thymidine metabolic process
GO:0046125	82.9129	0.000306789	0.0344703	0	1	1	pyrimidine deoxyribonucleoside metabolic process
GO:0009120	82.9129	0.000306789	0.0344703	0	1	1	deoxyribonucleoside metabolic process
GO:0004797	82.9129	0.000306789	0.0344703	0	1	1	thymidine kinase activity
GO:0055046	6.80318	0.000312474	0.0347069	1.21379	0.0116455	0.0599905	microgametogenesis
GO:0072583	12.8045	0.000314723	0.0347069	1.03243	0.435458	1	clathrin-dependent endocytosis
GO:0046620	12.6648	0.000327878	0.0357417	1.17651	0.136696	0.59353	regulation of organ growth
GO:0031012	12.6418	0.000330108	0.0357417	0.222341	1	1	extracellular matrix
GO:0048830	22.6142	0.000361151	0.0387506	0.356144	0.999779	1	adventitious root development
GO:0045017	5.48444	0.000365993	0.0389195	0.423106	1	1	glycerolipid biosynthetic process
GO:0042335	8.44575	0.000376133	0.0396438	0.65143	0.999813	1	cuticle development
GO:0015297	6.31779	0.000459714	0.0474661	1.37828	2.48e-05	0.000164734	antiporter activity
GO:0035136	66.9681	0.000462306	0.0474661	0.189833	0.994006	1	forelimb morphogenesis
GO:0035108	66.9681	0.000462306	0.0474661	0.189833	0.994006	1	limb morphogenesis
GO:0010024	63.3152	0.000515021	0.0515454	0	1	1	phytochromobilin biosynthetic process
GO:0051202	63.3152	0.000515021	0.0515454	0	1	1	phytochromobilin metabolic process
GO:0006788	63.3152	0.000515021	0.0515454	0	1	1	heme oxidation
GO:0032878	11.1272	0.000530424	0.0526446	1.48445	0.000918856	0.00528675	regulation of establishment or maintenance of cell polarity
GO:0004130	19.5651	0.000547264	0.0538671	0.386964	0.9998	1	cytochrome-c peroxidase activity
GO:0044390	10.4746	0.000663022	0.0642	2.13259	5.21588e-12	5.34605e-11	ubiquitin-like protein conjugating enzyme binding
GO:2000116	10.4746	0.000663022	0.0642	0.423124	1	1	regulation of cysteine-type endopeptidase activity
GO:0002020	9.83841	0.00083468	0.0801697	1.49297	0.000374326	0.00224144	protease binding
GO:0048640	9.70138	0.000878685	0.0837211	0.652928	0.998527	1	negative regulation of developmental growth
GO:0030276	9.46411	0.000961969	0.090929	0.729062	0.989573	1	clathrin binding
GO:0010287	5.42268	0.00100604	0.0943463	0.497026	1	1	plastoglobule
GO:0004866	9.32474	0.00101551	0.09449	5.61568	5.21961e-90	8.6341e-88	endopeptidase inhibitor activity
GO:0051303	9.27508	0.00103549	0.095602	0.358825	1	1	establishment of chromosome localization
GO:0030414	8.98784	0.00116118	0.106382	5.33756	1.28693e-86	1.96504e-84	peptidase inhibitor activity
GO:0030510	38.6926	0.00133289	0.121181	5.6275	1.66711e-12	1.81992e-11	regulation of BMP signaling pathway
GO:0031984	1.83293	0.00135814	0.122541	0.616656	1	1	organelle subcompartment
GO:0034644	8.57828	0.00137531	0.123157	0.357493	1	1	cellular response to UV
GO:0009791	1.71129	0.00144562	0.128487	0.79733	1	1	post-embryonic development
GO:0061135	8.42268	0.00146946	0.128639	4.81627	7.76116e-79	1.06248e-76	endopeptidase regulator activity
GO:0006777	36.6561	0.00147972	0.128639	0.211813	0.998916	1	Mo-molybdopterin cofactor biosynthetic process
GO:0019720	36.6561	0.00147972	0.128639	0.211813	0.998916	1	Mo-molybdopterin cofactor metabolic process
GO:0010951	8.17553	0.0016362	0.139194	4.61115	1.08042e-75	1.31304e-73	negative regulation of endopeptidase activity
GO:0007411	34.8233	0.00163392	0.139194	0.0996149	0.999936	1	axon guidance
GO:0097485	34.8233	0.00163392	0.139194	0.0996149	0.999936	1	neuron projection guidance
GO:0019136	34.4785	0.00166564	0.139703	0.301833	0.996356	1	deoxynucleoside kinase activity
GO:1901255	34.4785	0.00166564	0.139703	0	1	1	nucleotide-excision repair involved in interstrand cross-link repair
GO:0018454	34.1405	0.00169766	0.141392	0	1	1	acetoacetyl-CoA reductase activity
GO:0004392	33.809	0.00172996	0.143082	0	1	1	heme oxygenase (decyclizing) activity
GO:0009517	33.4839	0.00176256	0.144773	0	1	1	PSII associated light-harvesting complex II
GO:0010466	7.91539	0.00183806	0.149118	4.42476	5.45521e-73	5.96069e-71	negative regulation of peptidase activity
GO:0009628	1.56042	0.0018405	0.149118	0.928802	1	1	response to abiotic stimulus
GO:0050000	7.87066	0.00187584	0.150531	0.303108	1	1	chromosome localization
GO:0009503	32.2438	0.00189586	0.150531	0	1	1	thylakoid light-harvesting complex
GO:0030076	32.2438	0.00189586	0.150531	0	1	1	light-harvesting complex
GO:0061134	7.76537	0.00196868	0.155278	4.30555	5.00125e-71	5.36621e-69	peptidase regulator activity
GO:0060173	31.3723	0.00199888	0.156623	0.0898312	0.999978	1	limb development
GO:0006898	7.71377	0.00201628	0.156953	1.66828	2.49851e-07	1.90021e-06	receptor-mediated endocytosis
GO:0016747	3.04464	0.00213713	0.164337	1.2449	2.4658e-07	1.87773e-06	transferase activity, transferring acyl groups other than amino-acyl groups
GO:0010030	7.58772	0.00213872	0.164337	0.528314	0.999999	1	positive regulation of seed germination
GO:0090100	30.0201	0.00217637	0.166157	0.173467	0.999823	1	positive regulation of transmembrane receptor protein serine/threonine kinase signaling pathway
GO:0008360	7.52217	0.00220608	0.167353	1.46212	0.00013605	0.00084585	regulation of cell shape
GO:0004601	5.60319	0.00227812	0.171724	2.29943	9.80213e-32	2.53239e-30	peroxidase activity
GO:0010259	28.5437	0.00239883	0.179686	3.80093	2.94485e-09	2.55822e-08	multicellular organism aging
GO:0016684	5.45231	0.00255863	0.190458	2.22406	1.04162e-29	2.26794e-28	oxidoreductase activity, acting on peroxide as acceptor
GO:0009411	3.46951	0.00264585	0.194519	0.869192	0.993331	1	response to UV
GO:0045703	27.2057	0.00263157	0.194519	0	1	1	ketoreductase activity
GO:0004792	26.5826	0.00275176	0.201065	0.0762203	0.999997	1	thiosulfate sulfurtransferase activity
GO:0000405	25.9875	0.0028745	0.208752	0.150166	0.999963	1	bubble DNA binding
GO:0035639	3.12329	0.00295312	0.213161	0.397228	1	1	purine ribonucleoside triphosphate binding
GO:0071494	25.0527	0.00308469	0.220289	0.44716	0.990082	1	cellular response to UV-C
GO:0009408	2.88906	0.00308885	0.220289	0.690741	1	1	response to heat
GO:0005950	24.8737	0.00312757	0.22041	0.600664	0.949244	1	anthranilate synthase complex
GO:0004049	24.8737	0.00312757	0.22041	0.600664	0.949244	1	anthranilate synthase activity
GO:0008106	24.5234	0.00321416	0.22518	0.43744	0.991773	1	alcohol dehydrogenase (NADP+) activity
GO:0010447	24.3519	0.00325788	0.226908	1.70391	0.0212251	0.105198	response to acidic pH
GO:0009157	24.1828	0.00330187	0.228635	0.211072	0.999882	1	deoxyribonucleoside monophosphate biosynthetic process
GO:0048831	2.53155	0.00364547	0.250969	0.969818	0.789999	1	regulation of shoot system development
GO:0070914	22.6125	0.00375703	0.257162	1.2305	0.244986	1	UV-damage excision repair
GO:0052548	6.40798	0.00388992	0.264737	3.44069	7.44725e-57	5.64947e-55	regulation of endopeptidase activity
GO:0006122	21.7645	0.00404334	0.273614	0.254711	0.999821	1	mitochondrial electron transport, ubiquinol to cytochrome c
GO:0046906	6.32075	0.00408102	0.274604	0.426708	1	1	tetrapyrrole binding
GO:0030162	3.56677	0.00412474	0.275987	1.31918	3.04107e-07	2.29963e-06	regulation of proteolysis
GO:0051336	3.21341	0.00416863	0.277365	1.20324	0.000127182	0.000792225	regulation of hydrolase activity
GO:0042744	9.42926	0.00427708	0.283	0.472792	0.999986	1	hydrogen peroxide catabolic process
GO:0045861	6.18053	0.00441344	0.290264	3.20158	6.24985e-51	4.11247e-49	negative regulation of proteolysis
GO:0016746	2.74082	0.00443561	0.290264	1.22934	3.18994e-07	2.40762e-06	transferase activity, transferring acyl groups
GO:0030136	6.13697	0.00452354	0.294401	0.760039	0.993842	1	clathrin-coated vesicle
GO:0048232	3.98215	0.00457917	0.296402	0.964189	0.710877	1	male gamete generation
GO:0051189	20.0133	0.00474943	0.300881	0.294184	0.999725	1	prosthetic group metabolic process
GO:0043545	20.0133	0.00474943	0.300881	0.294184	0.999725	1	molybdopterin cofactor metabolic process
GO:0010196	20.0133	0.00474943	0.300881	0.0574918	1	1	nonphotochemical quenching
GO:1990066	20.0133	0.00474943	0.300881	0.0574918	1	1	energy quenching
GO:0043231	1.23807	0.00480288	0.302658	0.916887	1	1	intracellular membrane-bounded organelle
GO:0052547	6.02027	0.00483582	0.30313	3.18292	1.32753e-51	8.8825e-50	regulation of peptidase activity
GO:0004181	19.6741	0.0049076	0.303678	0.532647	0.984019	1	metallocarboxypeptidase activity
GO:0006469	8.96021	0.00492107	0.303678	0.717334	0.984697	1	negative regulation of protein kinase activity
GO:0033673	8.96021	0.00492107	0.303678	0.717334	0.984697	1	negative regulation of kinase activity
GO:0004033	19.4543	0.00501438	0.307842	0.465253	0.99391	1	aldo-keto reductase (NADP) activity
GO:0045041	18.8233	0.00534112	0.326219	1.69783	0.010475	0.0543131	protein import into mitochondrial intermembrane space
GO:0090287	18.7221	0.0053965	0.326256	2.30159	3.28165e-05	0.000215341	regulation of cellular response to growth factor stimulus
GO:0009162	18.7221	0.0053965	0.326256	0.163152	0.999996	1	deoxyribonucleoside monophosphate metabolic process
GO:0016709	3.82191	0.00555752	0.334293	1.97205	2.67351e-34	7.5633e-33	oxidoreductase activity, acting on paired donors, with incorporation or reduction of molecular oxygen, NAD(P)H as one donor, and incorporation of one atom of oxygen
GO:0043227	1.22999	0.00574291	0.343709	0.929643	1	1	membrane-bounded organelle
GO:0017076	2.76705	0.00635588	0.37661	0.373251	1	1	purine nucleotide binding
GO:0032555	2.76705	0.00635588	0.37661	0.373251	1	1	purine ribonucleotide binding
GO:0005524	3.27716	0.00643915	0.379655	0.477845	1	1	ATP binding
GO:0001671	16.8228	0.00662011	0.388401	0.0483704	1	1	ATPase activator activity
GO:0043229	1.22146	0.00667802	0.389878	0.941673	1	1	intracellular organelle
GO:0005515	1.50922	0.00677608	0.393674	1.01784	0.129502	0.564971	protein binding
GO:0031209	16.5039	0.00686614	0.395052	0.49562	0.994231	1	SCAR complex
GO:0007409	16.5039	0.00686614	0.395052	0.0474578	1	1	axonogenesis
GO:0009268	16.3489	0.0069907	0.399813	1.63155	0.011623	0.0599006	response to pH
GO:0045143	5.40373	0.00701603	0.399813	1.00098	0.510023	1	homologous chromosome segregation
GO:0048667	15.9739	0.00730655	0.408549	0.0459408	1	1	cell morphogenesis involved in neuron differentiation
GO:0048812	15.9739	0.00730655	0.408549	0.0459408	1	1	neuron projection morphogenesis
GO:0120039	15.9739	0.00730655	0.408549	0.0459408	1	1	plasma membrane bounded cell projection morphogenesis
GO:0048858	15.9739	0.00730655	0.408549	0.0459408	1	1	cell projection morphogenesis
GO:0051865	5.30899	0.00745231	0.412823	0.899501	0.865714	1	protein autoubiquitination
GO:0043226	1.21753	0.00744317	0.412823	0.942778	1	1	organelle
GO:0022412	3.57476	0.00758224	0.418076	0.996676	0.52992	1	cellular process involved in reproduction in multicellular organism
GO:0009523	15.6157	0.00762876	0.418703	1.791	0.00217145	0.0120794	photosystem II
GO:0017001	7.53792	0.00787708	0.423345	0.548782	0.999952	1	antibiotic catabolic process
GO:0005457	15.3406	0.00789107	0.423345	0.0886435	1	1	GDP-fucose transmembrane transporter activity
GO:0036080	15.3406	0.00789107	0.423345	0.0886435	1	1	purine nucleotide-sugar transmembrane transporter activity
GO:0015783	15.3406	0.00789107	0.423345	0.0886435	1	1	GDP-fucose transmembrane transport
GO:0030904	15.4085	0.00782512	0.423345	0	1	1	retromer complex
GO:0034605	5.15573	0.00823217	0.439664	0.474273	1	1	cellular response to heat
GO:0051879	14.6933	0.0085644	0.455366	0.531864	0.992843	1	Hsp90 protein binding
GO:0007276	3.46107	0.00879241	0.465412	1.13232	0.0224915	0.110829	gamete generation
GO:0061564	14.4494	0.0088407	0.465897	0.0415745	1	1	axon development
GO:0043086	3.07774	0.00888801	0.466327	1.56132	7.56103e-20	1.18802e-18	negative regulation of catalytic activity
GO:0032553	2.61121	0.00904889	0.472686	0.356907	1	1	ribonucleotide binding
GO:0042743	7.14606	0.00909426	0.472981	0.473626	0.999999	1	hydrogen peroxide metabolic process
GO:0061061	13.8737	0.00954868	0.494456	2.11816	2.08939e-05	0.00013941	muscle structure development
GO:0060590	13.2912	0.0103556	0.53392	0.0382548	1	1	ATPase regulator activity
GO:0001933	6.74904	0.0105969	0.544006	0.618504	0.999681	1	negative regulation of protein phosphorylation
GO:0044421	3.30661	0.0108116	0.550312	1.68444	2.69881e-22	4.53354e-21	extracellular region part
GO:0070192	4.75451	0.0108122	0.550312	0.935743	0.773536	1	chromosome organization involved in meiotic cell cycle
GO:0005750	12.8974	0.0109608	0.553148	0.30488	0.999983	1	mitochondrial respiratory chain complex III
GO:0045275	12.8974	0.0109608	0.553148	0.30488	0.999983	1	respiratory chain complex III
GO:0004519	1.97693	0.0113491	0.570326	1.2221	1.56242e-12	1.70876e-11	endonuclease activity
GO:0035371	12.5263	0.0115812	0.579547	1.20734	0.189477	0.798255	microtubule plus-end
GO:0009954	12.3925	0.0118178	0.584023	0.563121	0.992913	1	proximal/distal pattern formation
GO:0097577	12.3925	0.0118178	0.584023	0	1	1	sequestering of iron ion
GO:0006880	12.3925	0.0118178	0.584023	0	1	1	intracellular sequestering of iron ion
GO:0016833	12.3486	0.0118971	0.585513	0.680827	0.960414	1	oxo-acid-lyase activity
GO:0051348	6.32415	0.0125949	0.617305	1.28675	0.0143626	0.0732587	negative regulation of transferase activity
GO:0042326	6.23358	0.0130844	0.638667	0.870922	0.875368	1	negative regulation of phosphorylation
GO:0046486	2.83835	0.0133261	0.647809	0.899345	0.974884	1	glycerolipid metabolic process
GO:0043168	1.93245	0.0136476	0.660742	0.57171	1	1	anion binding
GO:0022904	6.12396	0.0137113	0.661141	1.02295	0.44097	1	respiratory electron transport chain
GO:0000118	11.343	0.0139556	0.670206	1.58267	0.00535194	0.0286222	histone deacetylase complex
GO:0006743	11.2696	0.0141265	0.672985	0.728563	0.939054	1	ubiquinone metabolic process
GO:0006744	11.2696	0.0141265	0.672985	0.728563	0.939054	1	ubiquinone biosynthetic process
GO:0030554	2.79219	0.0144431	0.682609	0.434362	1	1	adenyl nucleotide binding
GO:0032559	2.79219	0.0144431	0.682609	0.434362	1	1	adenyl ribonucleotide binding
GO:0032990	10.9852	0.014819	0.697607	0.60166	0.990456	1	cell part morphogenesis
GO:0015095	10.5205	0.0160655	0.750353	0.3437	0.999989	1	magnesium ion transmembrane transporter activity
GO:1903830	10.5205	0.0160655	0.750353	0.3437	0.999989	1	magnesium ion transmembrane transport
GO:0006778	4.21118	0.0161393	0.750854	0.430268	1	1	porphyrin-containing compound metabolic process
GO:0032922	10.426	0.0163382	0.754218	2.18724	3.10331e-07	2.34372e-06	circadian regulation of gene expression
GO:1990752	10.426	0.0163382	0.754218	1.09577	0.335214	1	microtubule end
GO:0035107	10.364	0.0165212	0.756796	1.54524	0.00593486	0.0316402	appendage morphogenesis
GO:0048736	10.364	0.0165212	0.756796	1.54524	0.00593486	0.0316402	appendage development
GO:0009521	10.3332	0.0166129	0.758085	1.78168	0.00023841	0.00145688	photosystem
GO:0005575	1.16455	0.0169283	0.769527	1.10551	1.17593e-61	1.00758e-59	cellular_component
GO:0033013	4.11659	0.0173767	0.786909	0.420224	1	1	tetrapyrrole metabolic process
GO:0045926	4.10205	0.0175774	0.791496	0.88774	0.918536	1	negative regulation of growth
GO:0008238	4.09963	0.017611	0.791496	0.450571	1	1	exopeptidase activity
GO:0050793	1.63442	0.0177148	0.793171	1.05711	0.00581132	0.0310232	regulation of developmental process
GO:0009738	2.95328	0.0178022	0.794098	0.998625	0.517861	1	abscisic acid-activated signaling pathway
GO:0008237	4.07088	0.018017	0.800682	0.28348	1	1	metallopeptidase activity
GO:0008285	4.06612	0.0180853	0.800726	0.88624	0.922191	1	negative regulation of cell population proliferation
GO:0032781	9.83698	0.0182067	0.803116	0.143319	1	1	positive regulation of ATPase activity
GO:0030234	2.3129	0.0183704	0.807348	0.857564	0.999763	1	enzyme regulator activity
GO:0007275	1.36544	0.0186132	0.812029	1.03015	0.0137218	0.0701702	multicellular organism development
GO:0060589	4.03316	0.0185674	0.812029	0.355009	1	1	nucleoside-triphosphatase regulator activity
GO:0032269	2.63864	0.0189861	0.825272	1.29608	3.20088e-08	2.56717e-07	negative regulation of cellular protein metabolic process
GO:0010207	9.59308	0.0190755	0.826143	0.225457	1	1	photosystem II assembly
GO:0090092	9.46274	0.0195656	0.844299	1.05117	0.415242	1	regulation of transmembrane receptor protein serine/threonine kinase signaling pathway
GO:0044092	2.61039	0.0199858	0.847356	1.32989	8.75874e-10	7.86109e-09	negative regulation of molecular function
GO:0043140	9.33589	0.020061	0.847356	1.03571	0.447527	1
GO:0019516	51.2068	0.0198983	0.847356	0.295916	0.963721	1	lactate oxidation
GO:0051990	51.2068	0.0198983	0.847356	0.295916	0.963721	1	(R)-2-hydroxyglutarate dehydrogenase activity
GO:0031903	5.29251	0.0200634	0.847356	0.260642	1	1	microbody membrane
GO:0005778	5.29251	0.0200634	0.847356	0.260642	1	1	peroxisomal membrane
GO:0016575	9.2614	0.0203607	0.855055	1.53373	0.00445673	0.0240288	histone deacetylation
GO:0036297	9.23683	0.020461	0.855055	0.0533738	1	1	interstrand cross-link repair
GO:0097367	2.27001	0.0204099	0.855055	0.413514	1	1	carbohydrate derivative binding
GO:0070069	9.16391	0.0207632	0.864651	2.25735	1.19188e-08	9.76962e-08	cytochrome complex
GO:0051346	3.87173	0.0211726	0.875574	2.32997	9.85195e-38	3.19719e-36	negative regulation of hydrolase activity
GO:0030135	3.87173	0.0211726	0.875574	0.893101	0.913945	1	coated vesicle
GO:0016080	45.8166	0.022147	0.900241	0.264767	0.975166	1	synaptic vesicle targeting
GO:0016081	45.8166	0.022147	0.900241	0.264767	0.975166	1	synaptic vesicle docking
GO:1905958	3.82075	0.0220881	0.900241	0.757975	0.999261	1	negative regulation of cellular response to alcohol
GO:1901420	3.82075	0.0220881	0.900241	0.757975	0.999261	1	negative regulation of response to alcohol
GO:0009788	3.82075	0.0220881	0.900241	0.757975	0.999261	1	negative regulation of abscisic acid-activated signaling pathway
GO:0020037	8.72753	0.0227202	0.917281	0.283772	1	1	heme binding
GO:0008333	8.72753	0.0227202	0.917281	0.0758364	1	1	endosome to lysosome transport
GO:0010019	8.70571	0.0228253	0.918408	0.363027	0.999996	1	chloroplast-nucleus signaling pathway
GO:0043462	8.59823	0.0233534	0.936496	0.279472	1	1	regulation of ATPase activity
GO:0051656	3.13309	0.0235402	0.940816	0.884613	0.965513	1	establishment of organelle localization
GO:0046149	8.49337	0.0238866	0.945148	0.327802	0.999999	1	pigment catabolic process
GO:0015996	8.49337	0.0238866	0.945148	0.327802	0.999999	1	chlorophyll catabolic process
GO:0051238	8.49337	0.0238866	0.945148	0.0986369	1	1	sequestering of metal ion
GO:0005769	3.71676	0.0241128	0.950937	0.494603	1	1	early endosome
GO:0006476	8.41131	0.0243167	0.952673	1.37448	0.0244287	0.119534	protein deacetylation
GO:0010600	8.41131	0.0243167	0.952673	0.273262	1	1	regulation of auxin biosynthetic process
GO:0051248	2.49292	0.0248213	0.964394	1.29396	1.6375e-08	1.33305e-07	negative regulation of protein metabolic process
GO:0051260	3.68335	0.0248117	0.964394	1.43823	3.27669e-07	2.4684e-06	protein homooligomerization
GO:0006896	8.31093	0.0248589	0.964394	0.244793	1	1	Golgi to vacuole transport
GO:1902456	8.21292	0.0254059	0.979236	0.31669	1	1	regulation of stomatal opening
GO:0031409	8.21292	0.0254059	0.979236	0	1	1	pigment binding
GO:0006003	39.5688	0.0255104	0.980093	0.228662	0.985935	1	fructose 2,6-bisphosphate metabolic process
GO:0005871	3.64099	0.0257342	0.985514	1.04901	0.28095	1	kinesin complex
GO:0008235	8.13616	0.025847	0.98666	0.264131	1	1	metalloexopeptidase activity
GO:0051761	0	1	1	inf	0	0	sesquiterpene metabolic process
GO:0051762	0	1	1	inf	0	0	sesquiterpene biosynthetic process
GO:0042214	0	1	1	17.0486	0	0	terpene metabolic process
GO:0046246	0	1	1	21.5829	0	0	terpene biosynthetic process
GO:0010333	0	1	1	175.012	0	0	terpene synthase activity
GO:0010334	0	1	1	inf	0	0	sesquiterpene synthase activity
GO:0016679	0	1	1	23.822	2.32777e-289	3.08041e-286	oxidoreductase activity, acting on diphenols and related substances as donors
GO:0009611	1.14493	0.442641	1	2.72767	6.57844e-230	6.5291e-227	response to wounding
GO:0004867	0	1	1	49.5229	1.79688e-206	1.64622e-203	serine-type endopeptidase inhibitor activity
GO:0004672	0.777517	0.804631	1	1.87429	6.26485e-178	5.3296e-175	protein kinase activity
GO:0080027	0	1	1	23.7321	3.26561e-173	2.5929e-170	response to herbivore
GO:0043692	0	1	1	27.0213	7.05357e-172	4.94165e-169	monoterpene metabolic process
GO:0043693	0	1	1	27.0213	7.05357e-172	4.94165e-169	monoterpene biosynthetic process
GO:0080032	0	1	1	inf	1.788e-161	1.18306e-158	methyl jasmonate esterase activity
GO:0006468	0.840443	0.741066	1	1.79584	1.06102e-157	6.65092e-155	protein phosphorylation
GO:0080150	0	1	1	inf	3.27607e-155	1.9509e-152	S-adenosyl-L-methionine:benzoic acid carboxyl methyl transferase activity
GO:0006952	0.223002	0.999848	1	1.68079	1.32434e-150	7.51087e-148	defense response
GO:0006721	1.14185	0.48854	1	2.7563	9.23151e-143	4.99761e-140	terpenoid metabolic process
GO:0009626	1.36543	0.519424	1	5.37017	6.98932e-142	3.61925e-139	plant-type hypersensitive response
GO:0034050	1.35375	0.52245	1	5.30009	2.65613e-140	1.3181e-137	host programmed cell death induced by symbiont
GO:0008300	0	1	1	9.09374	5.5713e-135	2.65417e-132	isoprenoid catabolic process
GO:0004674	0.691686	0.862988	1	1.81755	3.37783e-134	1.54731e-131	protein serine/threonine kinase activity
GO:0006955	0.374485	0.969581	1	2.08444	1.24255e-133	5.48103e-131	immune response
GO:0080030	0	1	1	1277.85	3.1779e-131	1.35174e-128	methyl indole-3-acetate esterase activity
GO:0009975	0	1	1	6.04755	4.07956e-129	1.67543e-126	cyclase activity
GO:0006720	0.981517	0.589432	1	2.49017	1.35174e-128	5.3664e-126	isoprenoid metabolic process
GO:0043207	0.319553	0.999472	1	1.56546	3.56532e-126	1.36977e-123	response to external biotic stimulus
GO:0008299	1.24861	0.431151	1	2.70591	4.29888e-125	1.59999e-122	isoprenoid biosynthetic process
GO:0009607	0.318288	0.999496	1	1.5588	4.84318e-124	1.74795e-121	response to biotic stimulus
GO:0045087	0.403682	0.957974	1	2.07467	2.62542e-122	9.19668e-120	innate immune response
GO:0050550	0	1	1	inf	9.15462e-121	2.53562e-118	pinene synthase activity
GO:0050551	0	1	1	inf	9.15462e-121	2.53562e-118	myrcene synthase activity
GO:0050552	0	1	1	inf	9.15462e-121	2.53562e-118	(4S)-limonene synthase activity
GO:0052578	0	1	1	inf	9.15462e-121	2.53562e-118	alpha-farnesene synthase activity
GO:0080015	0	1	1	inf	9.15462e-121	2.53562e-118	sabinene synthase activity
GO:0034002	0	1	1	inf	9.15462e-121	2.53562e-118	(R)-limonene synthase activity
GO:0034768	0	1	1	inf	9.15462e-121	2.53562e-118	(E)-beta-ocimene synthase activity
GO:0016098	0	1	1	inf	9.15462e-121	2.53562e-118	monoterpenoid metabolic process
GO:0016099	0	1	1	inf	9.15462e-121	2.53562e-118	monoterpenoid biosynthetic process
GO:0016106	0	1	1	6.19664	1.44826e-120	3.92018e-118	sesquiterpenoid biosynthetic process
GO:0052624	0	1	1	39.4532	5.97164e-118	1.54614e-115	2-phytyl-1,4-naphthoquinone methyltransferase activity
GO:0080013	0	1	1	1116.85	1.39761e-114	3.5416e-112	(E,E)-geranyllinalool synthase activity
GO:0080043	0	1	1	3.90577	2.56679e-113	6.23888e-111	quercetin 3-O-glucosyltransferase activity
GO:0080044	0	1	1	3.90577	2.56679e-113	6.23888e-111	quercetin 7-O-glucosyltransferase activity
GO:0045339	0	1	1	inf	2.05221e-112	4.88837e-110	farnesyl diphosphate catabolic process
GO:0016773	0.657431	0.917504	1	1.60554	2.50111e-111	5.84083e-109	phosphotransferase activity, alcohol group as acceptor
GO:0051707	0.321243	0.999438	1	1.5279	3.75366e-111	8.59731e-109	response to other organism
GO:0046527	0	1	1	2.60523	3.92535e-111	8.82092e-109	glucosyltransferase activity
GO:0080031	0	1	1	1046.42	2.65544e-107	5.85672e-105	methyl salicylate esterase activity
GO:0016115	0	1	1	7.74982	9.20234e-105	1.99273e-102	terpenoid catabolic process
GO:0016301	0.766183	0.837468	1	1.56225	1.11358e-104	2.36835e-102	kinase activity
GO:0008327	0	1	1	14.4332	2.26953e-102	4.74213e-100	methyl-CpG binding
GO:0045338	0	1	1	11.3198	4.6814e-99	9.61302e-97	farnesyl diphosphate metabolic process
GO:0034007	0	1	1	inf	7.61885e-99	1.53797e-96	S-linalool synthase activity
GO:0001046	0	1	1	6.55802	9.41454e-99	1.86879e-96	core promoter sequence-specific DNA binding
GO:0016740	0.825333	0.873809	1	1.30918	7.39237e-97	1.44333e-94	transferase activity
GO:0006714	0	1	1	4.58714	2.5908e-96	4.97685e-94	sesquiterpenoid metabolic process
GO:0016137	0	1	1	8.75698	5.93942e-95	1.12283e-92	glycoside metabolic process
GO:0080016	0	1	1	inf	1.14068e-94	2.09008e-92	(-)-E-beta-caryophyllene synthase activity
GO:0080017	0	1	1	inf	1.14068e-94	2.09008e-92	alpha-humulene synthase activity
GO:1903224	0	1	1	311.91	9.09088e-93	1.61601e-90	regulation of endodermal cell differentiation
GO:0010470	0	1	1	311.91	9.09088e-93	1.61601e-90	regulation of gastrulation
GO:0016310	0.923658	0.648826	1	1.5033	1.13372e-92	1.98567e-90	phosphorylation
GO:0016114	1.53983	0.309526	1	2.59977	2.39151e-92	4.12795e-90	terpenoid biosynthetic process
GO:0016772	0.655325	0.938021	1	1.47861	1.18339e-91	2.01345e-89	transferase activity, transferring phosphorus-containing groups
GO:0031176	0	1	1	inf	1.5439e-91	2.58984e-89	endo-1,4-beta-xylanase activity
GO:0005516	0	1	1	2.4631	8.74462e-90	1.42669e-87	calmodulin binding
GO:0009625	0	1	1	6.46069	8.03693e-88	1.29351e-85	response to insect
GO:0047461	0	1	1	inf	2.31147e-87	3.57528e-85	(+)-delta-cadinene synthase activity
GO:1901926	0	1	1	inf	2.31147e-87	3.57528e-85	cadinene metabolic process
GO:1901928	0	1	1	inf	2.31147e-87	3.57528e-85	cadinene biosynthetic process
GO:0047364	0	1	1	inf	2.82828e-85	4.2639e-83	desulfoglucosinolate sulfotransferase activity
GO:0002376	0.297169	0.990751	1	1.72512	2.87944e-85	4.28676e-83	immune system process
GO:0009575	0	1	1	29.4112	1.00658e-84	1.48005e-82	chromoplast stroma
GO:0035251	0	1	1	2.637	2.18565e-84	3.17452e-82	UDP-glucosyltransferase activity
GO:0048226	0	1	1	9.61475	4.52239e-83	6.48936e-81	Casparian strip
GO:0009605	0.497194	0.996675	1	1.36777	6.05537e-82	8.58565e-80	response to external stimulus
GO:0001047	0	1	1	4.92136	2.11946e-80	2.96973e-78	core promoter binding
GO:1902075	0	1	1	inf	4.68385e-80	6.48659e-78	cellular response to salt
GO:0090358	0	1	1	764.677	3.28475e-78	4.44562e-76	positive regulation of tryptophan metabolic process
GO:0031146	0	1	1	4.70264	5.9969e-78	8.02506e-76	SCF-dependent proteasomal ubiquitin-dependent protein catabolic process
GO:0008150	1.09944	0.0999607	1	1.11821	6.31866e-76	8.36169e-74	biological_process
GO:0051955	0	1	1	inf	7.01235e-76	8.61001e-74	regulation of amino acid transport
GO:0051952	0	1	1	inf	7.01235e-76	8.61001e-74	regulation of amine transport
GO:1902407	0	1	1	inf	7.01235e-76	8.61001e-74	assembly of actomyosin apparatus involved in mitotic cytokinesis
GO:1903789	0	1	1	inf	7.01235e-76	8.61001e-74	regulation of amino acid transmembrane transport
GO:0080143	0	1	1	inf	7.01235e-76	8.61001e-74	regulation of amino acid export
GO:0000912	0	1	1	inf	7.01235e-76	8.61001e-74	assembly of actomyosin apparatus involved in cytokinesis
GO:0000914	0	1	1	inf	7.01235e-76	8.61001e-74	phragmoplast assembly
GO:0044426	0	1	1	6.21745	1.9894e-75	2.39331e-73	cell wall part
GO:0071554	1.06387	0.486117	1	1.67931	1.19404e-74	1.39422e-72	cell wall organization or biogenesis
GO:0009962	0	1	1	4.17009	1.97641e-74	2.28534e-72	regulation of flavonoid biosynthetic process
GO:0044462	0	1	1	6.09019	2.89327e-74	3.31335e-72	external encapsulating structure part
GO:0098789	0	1	1	75.9191	5.70197e-74	6.46767e-72	pre-mRNA cleavage required for polyadenylation
GO:0043619	0	1	1	367.246	1.45941e-73	1.62444e-71	regulation of transcription from RNA polymerase II promoter in response to oxidative stress
GO:0043425	0	1	1	367.246	1.45941e-73	1.62444e-71	bHLH transcription factor binding
GO:0098787	0	1	1	69.5925	4.1109e-73	4.53341e-71	mRNA cleavage involved in mRNA processing
GO:0001653	0	1	1	6.85541	6.80524e-73	7.36821e-71	peptide receptor activity
GO:0031430	0	1	1	694.244	6.0516e-71	6.37828e-69	M band
GO:0031672	0	1	1	694.244	6.0516e-71	6.37828e-69	A band
GO:0060285	0	1	1	inf	1.28454e-69	1.33034e-67	cilium-dependent cell motility
GO:0001539	0	1	1	inf	1.28454e-69	1.33034e-67	cilium or flagellum-dependent cell motility
GO:0000184	0	1	1	5.4299	4.3341e-69	4.44992e-67	nuclear-transcribed mRNA catabolic process, nonsense-mediated decay
GO:0016835	0	1	1	2.67104	1.45528e-68	1.4814e-66	carbon-oxygen lyase activity
GO:1903959	0	1	1	5.43611	3.37189e-68	3.40332e-66	regulation of anion transmembrane transport
GO:0051704	0.481208	0.997834	1	1.3252	1.12155e-67	1.12249e-65	multi-organism process
GO:0009877	7.07729	0.132241	1	10.9997	3.06861e-67	3.0456e-65	nodulation
GO:0003824	1.17508	0.0573287	1	1.15734	9.87176e-67	9.71675e-65	catalytic activity
GO:0061760	0	1	1	inf	1.73856e-66	1.69723e-64	antifungal innate immune response
GO:0010346	0	1	1	4.37096	1.30335e-65	1.25184e-63	shoot axis formation
GO:0010223	0	1	1	4.37096	1.30335e-65	1.25184e-63	secondary shoot formation
GO:0042341	0	1	1	inf	1.9231e-65	1.81779e-63	cyanogenic glycoside metabolic process
GO:0019756	0	1	1	inf	1.9231e-65	1.81779e-63	cyanogenic glycoside biosynthetic process
GO:0140096	1.03483	0.457213	1	1.30217	5.73098e-65	5.37448e-63	catalytic activity, acting on a protein
GO:0046247	0	1	1	17.8285	8.7138e-65	8.04507e-63	terpene catabolic process
GO:0016121	0	1	1	17.8285	8.7138e-65	8.04507e-63	carotene catabolic process
GO:0000943	0	1	1	23.2191	4.85716e-63	4.38249e-61	retrotransposon nucleocapsid
GO:0009914	0	1	1	2.47206	2.34985e-62	2.10427e-60	hormone transport
GO:0051749	0	1	1	inf	2.60279e-62	2.27935e-60	indole acetic acid carboxyl methyltransferase activity
GO:0010351	0	1	1	inf	2.60279e-62	2.27935e-60	lithium ion transport
GO:0010352	0	1	1	inf	2.60279e-62	2.27935e-60	lithium ion export across the plasma membrane
GO:0001763	0	1	1	4.1186	5.39887e-62	4.69347e-60	morphogenesis of a branching structure
GO:0010305	0	1	1	3.7768	5.91813e-62	5.1076e-60	leaf vascular tissue pattern formation
GO:0023052	0.914244	0.675619	1	1.34021	3.16765e-60	2.69477e-58	signaling
GO:0016829	0.565062	0.868197	1	1.85221	4.71974e-60	3.98668e-58	lyase activity
GO:0007165	0.768051	0.868489	1	1.34311	5.64987e-60	4.73873e-58	signal transduction
GO:0008169	0	1	1	6.87482	1.22278e-59	1.01841e-57	C-methyltransferase activity
GO:1903522	0	1	1	inf	3.8966e-58	3.20058e-56	regulation of blood circulation
GO:0052716	0	1	1	inf	3.8966e-58	3.20058e-56	hydroquinone:oxygen oxidoreductase activity
GO:0016139	0	1	1	10.2398	5.12059e-58	4.17714e-56	glycoside catabolic process
GO:0045217	0	1	1	563.441	1.82959e-57	1.42421e-55	cell-cell junction maintenance
GO:0045218	0	1	1	563.441	1.82959e-57	1.42421e-55	zonula adherens maintenance
GO:0090136	0	1	1	563.441	1.82959e-57	1.42421e-55	epithelial cell-cell adhesion
GO:0005913	0	1	1	563.441	1.82959e-57	1.42421e-55	cell-cell adherens junction
GO:0005915	0	1	1	563.441	1.82959e-57	1.42421e-55	zonula adherens
GO:0034334	0	1	1	563.441	1.82959e-57	1.42421e-55	adherens junction maintenance
GO:0034331	0	1	1	563.441	1.82959e-57	1.42421e-55	cell junction maintenance
GO:0009531	0	1	1	4.80792	2.6922e-57	2.08209e-55	secondary cell wall
GO:0009395	0	1	1	5.7646	4.11142e-57	3.15916e-55	phospholipid catabolic process
GO:0009733	0.571617	0.894715	1	1.6587	7.14744e-57	5.4568e-55	response to auxin
GO:0048766	0	1	1	4.92615	8.20752e-57	6.18681e-55	root hair initiation
GO:0007113	0	1	1	inf	5.27374e-55	3.95033e-53	endomitotic cell cycle
GO:1901600	0	1	1	12.1224	5.72076e-55	4.23194e-53	strigolactone metabolic process
GO:1901601	0	1	1	12.1224	5.72076e-55	4.23194e-53	strigolactone biosynthetic process
GO:0032196	0	1	1	12.4815	1.28806e-54	9.4115e-53	transposition
GO:0032197	0	1	1	12.4815	1.28806e-54	9.4115e-53	transposition, RNA-mediated
GO:0034765	0	1	1	3.2662	1.67214e-54	1.21434e-52	regulation of ion transmembrane transport
GO:0031124	0	1	1	3.22621	8.26185e-54	5.96355e-52	mRNA 3'-end processing
GO:0046777	0	1	1	1.84966	8.6676e-54	6.21874e-52	protein autophosphorylation
GO:0005849	0	1	1	4.69896	2.63832e-53	1.88158e-51	mRNA cleavage factor complex
GO:0050896	0.976392	0.597958	1	1.14904	5.94136e-53	4.212e-51	response to stimulus
GO:1900426	0	1	1	4.19248	6.11119e-53	4.30676e-51	positive regulation of defense response to bacterium
GO:0008219	0.437035	0.898535	1	2.01622	1.18525e-52	8.30373e-51	cell death
GO:0006378	0	1	1	3.56244	1.67143e-52	1.16414e-50	mRNA polyadenylation
GO:0009734	0.714335	0.75343	1	2.36526	1.96528e-52	1.36084e-50	auxin-activated signaling pathway
GO:0070509	0	1	1	15.9466	5.19487e-52	3.57635e-50	calcium ion import
GO:0080131	0	1	1	inf	7.13756e-52	4.83002e-50	hydroxyjasmonate sulfotransferase activity
GO:0006936	0	1	1	inf	7.13756e-52	4.83002e-50	muscle contraction
GO:0003012	0	1	1	inf	7.13756e-52	4.83002e-50	muscle system process
GO:0044070	0	1	1	3.8031	1.01477e-51	6.82823e-50	regulation of anion transport
GO:0043618	0	1	1	7.41071	2.08956e-51	1.39032e-49	regulation of transcription from RNA polymerase II promoter in response to stress
GO:0004888	0.748569	0.746195	1	1.91222	2.92429e-51	1.93491e-49	transmembrane signaling receptor activity
GO:0008146	0	1	1	11.6764	6.89279e-51	4.51061e-49	sulfotransferase activity
GO:0010817	0.309876	0.988249	1	1.54964	8.18091e-51	5.3243e-49	regulation of hormone levels
GO:0090357	0	1	1	18.896	8.85453e-51	5.73138e-49	regulation of tryptophan metabolic process
GO:0038023	0.612603	0.837046	1	1.80594	1.24751e-50	8.03126e-49	signaling receptor activity
GO:0060918	0	1	1	2.30764	3.41758e-50	2.18835e-48	auxin transport
GO:0002833	0	1	1	3.51871	1.07308e-49	6.83445e-48	positive regulation of response to biotic stimulus
GO:0098719	0	1	1	10.4991	2.45932e-49	1.54976e-47	sodium ion import across plasma membrane
GO:0043291	0	1	1	inf	9.66004e-49	5.90006e-47	RAVE complex
GO:1901725	0	1	1	inf	9.66004e-49	5.90006e-47	regulation of histone deacetylase activity
GO:1901726	0	1	1	inf	9.66004e-49	5.90006e-47	negative regulation of histone deacetylase activity
GO:0031064	0	1	1	inf	9.66004e-49	5.90006e-47	negative regulation of histone deacetylation
GO:0034648	0	1	1	inf	9.66004e-49	5.90006e-47	histone demethylase activity (H3-dimethyl-K4 specific)
GO:0010618	0	1	1	inf	9.66004e-49	5.90006e-47	aerenchyma formation
GO:0010232	0	1	1	4.35369	1.6325e-48	9.86959e-47	vascular transport
GO:0010233	0	1	1	4.35369	1.6325e-48	9.86959e-47	phloem transport
GO:0036211	0.862984	0.785971	1	1.24916	2.19581e-48	1.31418e-46	protein modification process
GO:0006464	0.862984	0.785971	1	1.24916	2.19581e-48	1.31418e-46	cellular protein modification process
GO:0044260	0.63742	0.997486	1	1.17883	3.58771e-48	2.13648e-46	cellular macromolecule metabolic process
GO:0005887	1.41208	0.282495	1	1.74321	7.82959e-48	4.63933e-46	integral component of plasma membrane
GO:0006379	0	1	1	4.09849	8.02825e-48	4.73349e-46	mRNA cleavage
GO:0061337	0	1	1	inf	1.06853e-47	6.00294e-46	cardiac conduction
GO:0055117	0	1	1	inf	1.06853e-47	6.00294e-46	regulation of cardiac muscle contraction
GO:0060194	0	1	1	inf	1.06853e-47	6.00294e-46	regulation of antisense RNA transcription
GO:0060195	0	1	1	inf	1.06853e-47	6.00294e-46	negative regulation of antisense RNA transcription
GO:0086065	0	1	1	inf	1.06853e-47	6.00294e-46	cell communication involved in cardiac conduction
GO:0006942	0	1	1	inf	1.06853e-47	6.00294e-46	regulation of striated muscle contraction
GO:0008016	0	1	1	inf	1.06853e-47	6.00294e-46	regulation of heart contraction
GO:0010880	0	1	1	inf	1.06853e-47	6.00294e-46	regulation of release of sequestered calcium ion into cytosol by sarcoplasmic reticulum
GO:0010881	0	1	1	inf	1.06853e-47	6.00294e-46	regulation of cardiac muscle contraction by regulation of the release of sequestered calcium ion
GO:0010882	0	1	1	inf	1.06853e-47	6.00294e-46	regulation of cardiac muscle contraction by calcium ion signaling
GO:0005222	0	1	1	462.824	4.1385e-47	2.31406e-45	intracellular cAMP-activated cation channel activity
GO:0034762	0	1	1	2.93822	4.21367e-47	2.33551e-45	regulation of transmembrane transport
GO:0043631	0	1	1	3.26516	4.21607e-47	2.33551e-45	RNA polyadenylation
GO:0007166	0.698683	0.779365	1	1.82984	7.42762e-47	4.0955e-45	cell surface receptor signaling pathway
GO:0043902	0	1	1	2.83561	8.80202e-47	4.83097e-45	positive regulation of multi-organism process
GO:0009087	0	1	1	inf	1.18195e-46	6.39863e-45	methionine catabolic process
GO:0018826	0	1	1	inf	1.18195e-46	6.39863e-45	methionine gamma-lyase activity
GO:0019458	0	1	1	inf	1.18195e-46	6.39863e-45	methionine catabolic process via 2-oxobutanoate
GO:0016101	0.861816	0.686708	1	2.42139	1.34932e-46	7.2717e-45	diterpenoid metabolic process
GO:0032890	0	1	1	14.8988	1.39578e-46	7.48818e-45	regulation of organic acid transport
GO:0006950	0.771041	0.95156	1	1.18349	6.40976e-46	3.42333e-44	response to stress
GO:0016759	0	1	1	4.30143	1.24605e-45	6.62519e-44	cellulose synthase activity
GO:0046514	0	1	1	inf	1.30739e-45	6.62599e-44	ceramide catabolic process
GO:0046477	0	1	1	inf	1.30739e-45	6.62599e-44	glycosylceramide catabolic process
GO:0046479	0	1	1	inf	1.30739e-45	6.62599e-44	glycosphingolipid catabolic process
GO:0060294	0	1	1	inf	1.30739e-45	6.62599e-44	cilium movement involved in cell motility
GO:0006677	0	1	1	inf	1.30739e-45	6.62599e-44	glycosylceramide metabolic process
GO:0005995	0	1	1	inf	1.30739e-45	6.62599e-44	melibiose catabolic process
GO:0005994	0	1	1	inf	1.30739e-45	6.62599e-44	melibiose metabolic process
GO:0018199	0	1	1	inf	1.30739e-45	6.62599e-44	peptidyl-glutamine modification
GO:0017186	0	1	1	inf	1.30739e-45	6.62599e-44	peptidyl-pyroglutamic acid biosynthetic process, using glutaminyl-peptide cyclotransferase
GO:0019377	0	1	1	inf	1.30739e-45	6.62599e-44	glycolipid catabolic process
GO:0016603	0	1	1	inf	1.30739e-45	6.62599e-44	glutaminyl-peptide cyclotransferase activity
GO:0009512	0	1	1	98.6017	1.41955e-45	7.16394e-44	cytochrome b6f complex
GO:0012501	0.535456	0.845508	1	2.04827	1.47181e-45	7.39632e-44	programmed cell death
GO:0045263	0	1	1	15.5115	1.55787e-45	7.79589e-44	proton-transporting ATP synthase complex, coupling factor F(o)
GO:0051716	0.691467	0.97868	1	1.20537	1.85552e-45	9.24653e-44	cellular response to stimulus
GO:0098739	0	1	1	5.54844	2.47486e-45	1.22815e-43	import across plasma membrane
GO:0043412	1.00149	0.518729	1	1.20447	6.84107e-45	3.38079e-43	macromolecule modification
GO:0015398	0	1	1	82.1681	1.18599e-44	5.83685e-43	high-affinity secondary active ammonium transmembrane transporter activity
GO:0048512	0	1	1	inf	1.44616e-44	7.00152e-43	circadian behavior
GO:1900744	0	1	1	inf	1.44616e-44	7.00152e-43	regulation of p38MAPK cascade
GO:0090036	0	1	1	inf	1.44616e-44	7.00152e-43	regulation of protein kinase C signaling
GO:0007622	0	1	1	inf	1.44616e-44	7.00152e-43	rhythmic behavior
GO:0090355	0	1	1	12.8656	2.14195e-44	1.03282e-42	positive regulation of auxin metabolic process
GO:0031347	0.207456	0.991924	1	1.59685	2.82216e-44	1.35532e-42	regulation of defense response
GO:0098659	0	1	1	7.77488	3.03694e-44	1.4468e-42	inorganic cation import across plasma membrane
GO:0099587	0	1	1	7.77488	3.03694e-44	1.4468e-42	inorganic ion import across plasma membrane
GO:1901334	0	1	1	7.9854	3.98493e-44	1.88335e-42	lactone metabolic process
GO:1901336	0	1	1	7.9854	3.98493e-44	1.88335e-42	lactone biosynthetic process
GO:2000280	0	1	1	2.16687	4.20379e-44	1.97894e-42	regulation of root development
GO:0004586	0	1	1	432.639	5.2443e-44	2.4494e-42	ornithine decarboxylase activity
GO:0033387	0	1	1	432.639	5.2443e-44	2.4494e-42	putrescine biosynthetic process from ornithine
GO:0009963	0	1	1	5.54246	5.38692e-44	2.50618e-42	positive regulation of flavonoid biosynthetic process
GO:1902288	0	1	1	5.28534	7.03051e-44	3.25811e-42	regulation of defense response to oomycetes
GO:0043620	0	1	1	5.89327	9.00624e-44	4.15753e-42	regulation of DNA-templated transcription in response to stress
GO:0065007	1.11645	0.164845	1	1.13444	9.44775e-44	4.34451e-42	biological regulation
GO:0030795	0	1	1	221.35	1.01661e-43	4.65684e-42	jasmonate O-methyltransferase activity
GO:0012502	0	1	1	inf	1.59965e-43	7.29954e-42	induction of programmed cell death
GO:0046328	0	1	1	11.3192	1.9072e-43	8.60406e-42	regulation of JNK cascade
GO:0070302	0	1	1	11.3192	1.9072e-43	8.60406e-42	regulation of stress-activated protein kinase signaling cascade
GO:0032872	0	1	1	11.3192	1.9072e-43	8.60406e-42	regulation of stress-activated MAPK cascade
GO:0001078	0	1	1	11.4989	3.00209e-43	1.34924e-41
GO:0019758	0	1	1	3.74069	7.2066e-43	3.20263e-41	glycosinolate biosynthetic process
GO:0019761	0	1	1	3.74069	7.2066e-43	3.20263e-41	glucosinolate biosynthetic process
GO:0016144	0	1	1	3.74069	7.2066e-43	3.20263e-41	S-glycoside biosynthetic process
GO:0140115	0	1	1	8.5066	1.0033e-42	4.4421e-41	export across plasma membrane
GO:1902290	0	1	1	5.58982	1.16471e-42	5.13767e-41	positive regulation of defense response to oomycetes
GO:0003964	0	1	1	8.96575	1.18088e-42	5.18978e-41	RNA-directed DNA polymerase activity
GO:0070663	0	1	1	12.7901	1.21378e-42	5.31475e-41	regulation of leukocyte proliferation
GO:0009753	0.547721	0.879256	1	1.68087	1.73121e-42	7.55265e-41	response to jasmonic acid
GO:0046602	0	1	1	inf	1.76943e-42	7.60789e-41	regulation of mitotic centrosome separation
GO:0046604	0	1	1	inf	1.76943e-42	7.60789e-41	positive regulation of mitotic centrosome separation
GO:0046605	0	1	1	inf	1.76943e-42	7.60789e-41	regulation of centrosome cycle
GO:0046607	0	1	1	inf	1.76943e-42	7.60789e-41	positive regulation of centrosome cycle
GO:0045493	0	1	1	6.70775	1.91836e-42	8.21859e-41	xylan catabolic process
GO:0005615	1.41141	0.414217	1	2.18208	2.23771e-42	9.55237e-41	extracellular space
GO:0050789	1.12566	0.161059	1	1.14012	2.55887e-42	1.08843e-40	regulation of biological process
GO:0031674	0	1	1	7.02287	3.14958e-42	1.31619e-40	I band
GO:0030016	0	1	1	7.02287	3.14958e-42	1.31619e-40	myofibril
GO:0030017	0	1	1	7.02287	3.14958e-42	1.31619e-40	sarcomere
GO:0030018	0	1	1	7.02287	3.14958e-42	1.31619e-40	Z disc
GO:0032260	0	1	1	10.5842	4.6573e-42	1.93946e-40	response to jasmonic acid stimulus involved in jasmonic acid and ethylene-dependent systemic resistance
GO:0019199	0.891376	0.656029	1	1.89382	5.93577e-42	2.46324e-40	transmembrane receptor protein kinase activity
GO:0051060	0	1	1	412.516	6.12559e-42	2.52442e-40	pullulanase activity
GO:0010303	0	1	1	412.516	6.12559e-42	2.52442e-40	limit dextrinase activity
GO:0098542	0.274369	0.998715	1	1.36891	8.01457e-42	3.2915e-40	defense response to other organism
GO:0035987	0	1	1	7.43356	8.45706e-42	3.46129e-40	endodermal cell differentiation
GO:0032103	0	1	1	3.06008	1.17828e-41	4.80593e-40	positive regulation of response to external stimulus
GO:0048304	0	1	1	inf	1.95722e-41	7.44746e-40	positive regulation of isotype switching to IgG isotypes
GO:0048302	0	1	1	inf	1.95722e-41	7.44746e-40	regulation of isotype switching to IgG isotypes
GO:0042100	0	1	1	inf	1.95722e-41	7.44746e-40	B cell proliferation
GO:0046651	0	1	1	inf	1.95722e-41	7.44746e-40	lymphocyte proliferation
GO:1901797	0	1	1	inf	1.95722e-41	7.44746e-40	negative regulation of signal transduction by p53 class mediator
GO:1902230	0	1	1	inf	1.95722e-41	7.44746e-40	negative regulation of intrinsic apoptotic signaling pathway in response to DNA damage
GO:1902254	0	1	1	inf	1.95722e-41	7.44746e-40	negative regulation of intrinsic apoptotic signaling pathway by p53 class mediator
GO:1902165	0	1	1	inf	1.95722e-41	7.44746e-40	regulation of intrinsic apoptotic signaling pathway in response to DNA damage by p53 class mediator
GO:1902166	0	1	1	inf	1.95722e-41	7.44746e-40	negative regulation of intrinsic apoptotic signaling pathway in response to DNA damage by p53 class mediator
GO:2001243	0	1	1	inf	1.95722e-41	7.44746e-40	negative regulation of intrinsic apoptotic signaling pathway
GO:0070661	0	1	1	inf	1.95722e-41	7.44746e-40	leukocyte proliferation
GO:0060047	0	1	1	inf	1.95722e-41	7.44746e-40	heart contraction
GO:0060048	0	1	1	inf	1.95722e-41	7.44746e-40	cardiac muscle contraction
GO:0071431	0	1	1	inf	1.95722e-41	7.44746e-40	tRNA-containing ribonucleoprotein complex export from nucleus
GO:0071528	0	1	1	inf	1.95722e-41	7.44746e-40	tRNA re-export from nucleus
GO:0006941	0	1	1	inf	1.95722e-41	7.44746e-40	striated muscle contraction
GO:0006409	0	1	1	inf	1.95722e-41	7.44746e-40	tRNA export from nucleus
GO:0003015	0	1	1	inf	1.95722e-41	7.44746e-40	heart process
GO:0030888	0	1	1	inf	1.95722e-41	7.44746e-40	regulation of B cell proliferation
GO:0030890	0	1	1	inf	1.95722e-41	7.44746e-40	positive regulation of B cell proliferation
GO:0032943	0	1	1	inf	1.95722e-41	7.44746e-40	mononuclear cell proliferation
GO:0045903	0	1	1	34.8796	4.52904e-41	1.71786e-39	positive regulation of translational fidelity
GO:0003674	1.14374	0.0441135	1	1.0918	1.67813e-40	6.34494e-39	molecular_function
GO:0010487	0	1	1	inf	2.16495e-40	8.13394e-39	thermospermine synthase activity
GO:0016768	0	1	1	inf	2.16495e-40	8.13394e-39	spermine synthase activity
GO:0090708	0	1	1	7.37337	2.24828e-40	8.42043e-39	specification of plant organ axis polarity
GO:0009964	0	1	1	20.4698	2.64918e-40	9.85991e-39	negative regulation of flavonoid biosynthetic process
GO:0033729	0	1	1	20.4698	2.64918e-40	9.85991e-39	anthocyanidin reductase activity
GO:0010150	0	1	1	1.88165	4.28618e-40	1.59029e-38	leaf senescence
GO:0032204	0	1	1	3.17588	6.66956e-40	2.46691e-38	regulation of telomere maintenance
GO:1902253	0	1	1	392.393	7.13882e-40	2.62418e-38	regulation of intrinsic apoptotic signaling pathway by p53 class mediator
GO:0071920	0	1	1	392.393	7.13882e-40	2.62418e-38	cleavage body
GO:0098863	0	1	1	201.227	1.26659e-39	4.50302e-38	nuclear migration by microtubule mediated pushing forces
GO:0099098	0	1	1	201.227	1.26659e-39	4.50302e-38	microtubule polymerization based movement
GO:1990734	0	1	1	201.227	1.26659e-39	4.50302e-38	astral microtubule anchoring at mitotic spindle pole body
GO:0061496	0	1	1	201.227	1.26659e-39	4.50302e-38	half bridge of mitotic spindle pole body
GO:0061497	0	1	1	201.227	1.26659e-39	4.50302e-38	inner plaque of mitotic spindle pole body
GO:0071957	0	1	1	201.227	1.26659e-39	4.50302e-38	old mitotic spindle pole body
GO:0071963	0	1	1	201.227	1.26659e-39	4.50302e-38	establishment or maintenance of cell polarity regulating cell shape
GO:0072393	0	1	1	201.227	1.26659e-39	4.50302e-38	microtubule anchoring at microtubule organizing center
GO:0005822	0	1	1	201.227	1.26659e-39	4.50302e-38	inner plaque of spindle pole body
GO:0005825	0	1	1	201.227	1.26659e-39	4.50302e-38	half bridge of spindle pole body
GO:0034631	0	1	1	201.227	1.26659e-39	4.50302e-38	microtubule anchoring at spindle pole body
GO:0090257	0	1	1	11.4764	1.42444e-39	5.04915e-38	regulation of muscle system process
GO:0010245	0	1	1	105.644	1.63047e-39	5.76228e-38	radial microtubular system formation
GO:0016119	0	1	1	6.117	2.16975e-39	7.64548e-38	carotene metabolic process
GO:1901660	0	1	1	inf	2.39473e-39	8.31522e-38	calcium ion export
GO:0120113	0	1	1	inf	2.39473e-39	8.31522e-38	protein localization by the NVT pathway
GO:0071020	0	1	1	inf	2.39473e-39	8.31522e-38	post-spliceosomal complex
GO:0071021	0	1	1	inf	2.39473e-39	8.31522e-38	U2-type post-spliceosomal complex
GO:0033565	0	1	1	inf	2.39473e-39	8.31522e-38	ESCRT-0 complex
GO:0007154	0.677578	0.954842	1	1.24387	5.37445e-39	1.86075e-37	cell communication
GO:0004497	2.29833	0.0499478	1	1.78251	5.45797e-39	1.88419e-37	monooxygenase activity
GO:0050898	0	1	1	15.9951	7.47207e-39	2.56462e-37	nitrile metabolic process
GO:0080028	0	1	1	15.9951	7.47207e-39	2.56462e-37	nitrile biosynthetic process
GO:0099568	0.414549	0.910373	1	1.81569	1.1171e-38	3.82319e-37	cytoplasmic region
GO:0006369	0	1	1	7.05811	1.84252e-38	6.28779e-37	termination of RNA polymerase II transcription
GO:0016758	0	1	1	1.57097	2.33014e-38	7.92912e-37	transferase activity, transferring hexosyl groups
GO:0050866	0	1	1	inf	2.64889e-38	8.71499e-37	negative regulation of cell activation
GO:0045575	0	1	1	inf	2.64889e-38	8.71499e-37	basophil activation
GO:0070666	0	1	1	inf	2.64889e-38	8.71499e-37	regulation of mast cell proliferation
GO:0070667	0	1	1	inf	2.64889e-38	8.71499e-37	negative regulation of mast cell proliferation
GO:0070664	0	1	1	inf	2.64889e-38	8.71499e-37	negative regulation of leukocyte proliferation
GO:0002276	0	1	1	inf	2.64889e-38	8.71499e-37	basophil activation involved in immune response
GO:0002695	0	1	1	inf	2.64889e-38	8.71499e-37	negative regulation of leukocyte activation
GO:0030990	0	1	1	inf	2.64889e-38	8.71499e-37	intraciliary transport particle
GO:0033003	0	1	1	inf	2.64889e-38	8.71499e-37	regulation of mast cell activation
GO:0033004	0	1	1	inf	2.64889e-38	8.71499e-37	negative regulation of mast cell activation
GO:0033006	0	1	1	inf	2.64889e-38	8.71499e-37	regulation of mast cell activation involved in immune response
GO:0033007	0	1	1	inf	2.64889e-38	8.71499e-37	negative regulation of mast cell activation involved in immune response
GO:0060089	0.542344	0.882641	1	1.63616	2.99121e-38	9.81413e-37	molecular transducer activity
GO:0009861	0	1	1	3.89087	6.81946e-38	2.23131e-36	jasmonic acid and ethylene-dependent systemic resistance
GO:0006382	0	1	1	372.27	8.29893e-38	2.70055e-36	adenosine to inosine editing
GO:0002100	0	1	1	372.27	8.29893e-38	2.70055e-36	tRNA wobble adenosine to inosine editing
GO:0009833	0	1	1	3.52063	1.04025e-37	3.36669e-36	plant-type primary cell wall biogenesis
GO:0016151	0	1	1	7.9188	1.4241e-37	4.59648e-36	nickel cation binding
GO:0097014	0	1	1	4.22711	1.52448e-37	4.90719e-36	ciliary plasm
GO:0048172	0	1	1	inf	2.93002e-37	9.15921e-36	regulation of short-term neuronal synaptic plasticity
GO:0050806	0	1	1	inf	2.93002e-37	9.15921e-36	positive regulation of synaptic transmission
GO:1901703	0	1	1	inf	2.93002e-37	9.15921e-36	protein localization involved in auxin polar transport
GO:0098703	0	1	1	inf	2.93002e-37	9.15921e-36	calcium ion import across plasma membrane
GO:1990034	0	1	1	inf	2.93002e-37	9.15921e-36	calcium ion export across plasma membrane
GO:1903730	0	1	1	inf	2.93002e-37	9.15921e-36	regulation of phosphatidate phosphatase activity
GO:1902656	0	1	1	inf	2.93002e-37	9.15921e-36	calcium ion import into cytosol
GO:0060291	0	1	1	inf	2.93002e-37	9.15921e-36	long-term synaptic potentiation
GO:0001729	0	1	1	inf	2.93002e-37	9.15921e-36	ceramide kinase activity
GO:0033280	0	1	1	inf	2.93002e-37	9.15921e-36	response to vitamin D
GO:0010866	0	1	1	inf	2.93002e-37	9.15921e-36	regulation of triglyceride biosynthetic process
GO:0005930	0	1	1	4.20979	3.87489e-37	1.20811e-35	axoneme
GO:0015491	0	1	1	4.08669	5.28532e-37	1.64355e-35	cation:cation antiporter activity
GO:0080134	0.132146	0.999481	1	1.41873	7.5891e-37	2.35381e-35	regulation of response to stress
GO:0071365	0.587312	0.817823	1	1.96785	1.05624e-36	3.2675e-35	cellular response to auxin stimulus
GO:0006796	0.820268	0.827897	1	1.23675	1.12584e-36	3.47378e-35	phosphate-containing compound metabolic process
GO:0006821	0	1	1	4.49491	1.19829e-36	3.68776e-35	chloride transport
GO:0098609	0	1	1	11.2161	1.40442e-36	4.31098e-35	cell-cell adhesion
GO:0043296	0	1	1	17.6075	1.78299e-36	5.45898e-35	apical junction complex
GO:0046933	0	1	1	20.5098	2.21155e-36	6.75372e-35	proton-transporting ATP synthase activity, rotational mechanism
GO:0043198	0	1	1	inf	3.24099e-36	9.626e-35	dendritic shaft
GO:0036376	0	1	1	inf	3.24099e-36	9.626e-35	sodium ion export across plasma membrane
GO:0035902	0	1	1	inf	3.24099e-36	9.626e-35	response to immobilization stress
GO:0099580	0	1	1	inf	3.24099e-36	9.626e-35	ion antiporter activity involved in regulation of postsynaptic membrane potential
GO:1990534	0	1	1	inf	3.24099e-36	9.626e-35	thermospermine oxidase activity
GO:0060078	0	1	1	inf	3.24099e-36	9.626e-35	regulation of postsynaptic membrane potential
GO:0086064	0	1	1	inf	3.24099e-36	9.626e-35	cell communication by electrical coupling involved in cardiac conduction
GO:0071320	0	1	1	inf	3.24099e-36	9.626e-35	cellular response to cAMP
GO:0010644	0	1	1	inf	3.24099e-36	9.626e-35	cell communication by electrical coupling
GO:0010762	0	1	1	inf	3.24099e-36	9.626e-35	regulation of fibroblast migration
GO:0010763	0	1	1	inf	3.24099e-36	9.626e-35	positive regulation of fibroblast migration
GO:0009814	0.66862	0.79954	1	1.69254	3.55784e-36	1.05408e-34	defense response, incompatible interaction
GO:0002699	0	1	1	8.43868	6.1136e-36	1.80677e-34	positive regulation of immune effector process
GO:0006353	0	1	1	5.96465	6.75873e-36	1.99249e-34	DNA-templated transcription, termination
GO:0009638	0	1	1	3.96955	1.16784e-35	3.42587e-34	phototropism
GO:0050080	0	1	1	inf	3.58497e-35	1.02884e-33	malonyl-CoA decarboxylase activity
GO:0007256	0	1	1	inf	3.58497e-35	1.02884e-33	activation of JNKK activity
GO:0009852	0	1	1	inf	3.58497e-35	1.02884e-33	auxin catabolic process
GO:0008432	0	1	1	inf	3.58497e-35	1.02884e-33	JUN kinase binding
GO:0004706	0	1	1	inf	3.58497e-35	1.02884e-33	JUN kinase kinase kinase activity
GO:0031434	0	1	1	inf	3.58497e-35	1.02884e-33	mitogen-activated protein kinase kinase binding
GO:0032231	0	1	1	inf	3.58497e-35	1.02884e-33	regulation of actin filament bundle assembly
GO:0032232	0	1	1	inf	3.58497e-35	1.02884e-33	negative regulation of actin filament bundle assembly
GO:0030992	0	1	1	inf	3.58497e-35	1.02884e-33	intraciliary transport particle B
GO:0009509	0	1	1	4.61158	4.60015e-35	1.31701e-33	chromoplast
GO:0097599	0	1	1	4.94332	5.66092e-35	1.61682e-33	xylanase activity
GO:0046834	0	1	1	3.09718	5.67537e-35	1.61707e-33	lipid phosphorylation
GO:0090693	0	1	1	1.78394	1.58426e-34	4.50322e-33	plant organ senescence
GO:0015298	0	1	1	3.78279	1.62804e-34	4.61664e-33	solute:cation antiporter activity
GO:0009888	0.55029	0.960188	1	1.32898	4.4041e-34	1.24296e-32	tissue development
GO:0004675	0.957053	0.617829	1	1.81796	6.22502e-34	1.75272e-32	transmembrane receptor protein serine/threonine kinase activity
GO:0006793	0.802624	0.851906	1	1.22417	6.2446e-34	1.75409e-32	phosphorus metabolic process
GO:0010067	0	1	1	4.56643	6.30348e-34	1.76646e-32	procambium histogenesis
GO:0043507	0	1	1	332.024	1.11194e-33	3.0798e-32	positive regulation of JUN kinase activity
GO:0043506	0	1	1	332.024	1.11194e-33	3.0798e-32	regulation of JUN kinase activity
GO:0046330	0	1	1	332.024	1.11194e-33	3.0798e-32	positive regulation of JNK cascade
GO:0070304	0	1	1	332.024	1.11194e-33	3.0798e-32	positive regulation of stress-activated protein kinase signaling cascade
GO:0032874	0	1	1	332.024	1.11194e-33	3.0798e-32	positive regulation of stress-activated MAPK cascade
GO:0032838	0	1	1	3.81003	1.14763e-33	3.17128e-32	plasma membrane bounded cell projection cytoplasm
GO:0044057	0	1	1	6.9017	1.17422e-33	3.23725e-32	regulation of system process
GO:0042659	0	1	1	5.60903	1.3795e-33	3.79443e-32	regulation of cell fate specification
GO:0010082	0	1	1	3.11436	2.48698e-33	6.82487e-32	regulation of root meristem growth
GO:0008194	0	1	1	1.69314	2.72519e-33	7.45731e-32	UDP-glycosyltransferase activity
GO:0016045	0	1	1	7.29228	2.72996e-33	7.45731e-32	detection of bacterium
GO:0009961	0	1	1	8.00591	3.82317e-33	1.03959e-31	response to 1-aminocyclopropane-1-carboxylic acid
GO:0098543	0	1	1	7.16089	6.66187e-33	1.80325e-31	detection of other organism
GO:0007492	0	1	1	5.26784	7.18844e-33	1.9326e-31	endoderm development
GO:0001704	0	1	1	5.26784	7.18844e-33	1.9326e-31	formation of primary germ layer
GO:0001706	0	1	1	5.26784	7.18844e-33	1.9326e-31	endoderm formation
GO:0045168	0	1	1	11.8725	8.5057e-33	2.2816e-31	cell-cell signaling involved in cell fate commitment
GO:0010089	0	1	1	2.49834	9.82446e-33	2.62942e-31	xylem development
GO:0009696	0	1	1	3.54285	1.20053e-32	3.20589e-31	salicylic acid metabolic process
GO:0007178	0.946128	0.624026	1	1.79353	1.21114e-32	3.22701e-31	transmembrane receptor protein serine/threonine kinase signaling pathway
GO:0043292	0	1	1	4.98288	1.49841e-32	3.97463e-31	contractile fiber
GO:0044449	0	1	1	4.98288	1.49841e-32	3.97463e-31	contractile fiber part
GO:0010359	0	1	1	3.85888	1.5252e-32	4.03669e-31	regulation of anion channel activity
GO:0050794	1.1119	0.207285	1	1.13025	1.66792e-32	4.40464e-31	regulation of cellular process
GO:0008152	0.998423	0.519512	1	1.09755	2.84377e-32	7.49321e-31	metabolic process
GO:0016849	0	1	1	3.43625	4.50722e-32	1.18501e-30	phosphorus-oxygen lyase activity
GO:0047230	0	1	1	53.1814	4.81532e-32	1.26323e-30	flavonol-3-O-glucoside L-rhamnosyltransferase activity
GO:0120127	0	1	1	inf	4.85182e-32	1.26445e-30	response to zinc ion starvation
GO:0080004	0	1	1	inf	4.85182e-32	1.26445e-30	thalian-diol desaturase activity
GO:0034224	0	1	1	inf	4.85182e-32	1.26445e-30	cellular response to zinc ion starvation
GO:0005217	0	1	1	12.5209	5.9575e-32	1.54921e-30	intracellular ligand-gated ion channel activity
GO:0070161	0	1	1	10.0614	9.10389e-32	2.35712e-30	anchoring junction
GO:0005912	0	1	1	10.0614	9.10389e-32	2.35712e-30	adherens junction
GO:0010051	1.32342	0.446101	1	1.94767	1.0124e-31	2.60988e-30	xylem and phloem pattern formation
GO:0046068	0	1	1	5.24951	1.55985e-31	3.96961e-30	cGMP metabolic process
GO:0052652	0	1	1	5.24951	1.55985e-31	3.96961e-30	cyclic purine nucleotide metabolic process
GO:0007613	0	1	1	5.24951	1.55985e-31	3.96961e-30	memory
GO:0006182	0	1	1	5.24951	1.55985e-31	3.96961e-30	cGMP biosynthetic process
GO:0009190	0	1	1	5.24951	1.55985e-31	3.96961e-30	cyclic nucleotide biosynthetic process
GO:0004383	0	1	1	5.24951	1.55985e-31	3.96961e-30	guanylate cyclase activity
GO:0090305	1.53484	0.0723745	1	1.33255	2.20476e-31	5.59887e-30	nucleic acid phosphodiester bond hydrolysis
GO:0015368	0	1	1	7.01535	2.69731e-31	6.83509e-30	calcium:cation antiporter activity
GO:0034332	0	1	1	11.47	3.03462e-31	7.67354e-30	adherens junction organization
GO:0005642	0	1	1	30.958	4.48455e-31	1.13159e-29	annulate lamellae
GO:0071766	0	1	1	inf	5.36674e-31	1.34564e-29	Actinobacterium-type cell wall biogenesis
GO:0009273	0	1	1	inf	5.36674e-31	1.34564e-29	peptidoglycan-based cell wall biogenesis
GO:0010341	0	1	1	inf	5.36674e-31	1.34564e-29	gibberellin carboxyl-O-methyltransferase activity
GO:0051444	0	1	1	13.7682	5.45905e-31	1.36304e-29	negative regulation of ubiquitin-protein transferase activity
GO:1904667	0	1	1	13.7682	5.45905e-31	1.36304e-29	negative regulation of ubiquitin protein ligase activity
GO:0038018	0	1	1	38.2331	5.63287e-31	1.39186e-29	Wnt receptor catabolic process
GO:2000051	0	1	1	38.2331	5.63287e-31	1.39186e-29	negative regulation of non-canonical Wnt signaling pathway
GO:0060071	0	1	1	38.2331	5.63287e-31	1.39186e-29	Wnt signaling pathway, planar cell polarity pathway
GO:0005109	0	1	1	38.2331	5.63287e-31	1.39186e-29	frizzled binding
GO:0032801	0	1	1	38.2331	5.63287e-31	1.39186e-29	receptor catabolic process
GO:0031514	0	1	1	5.48811	9.37785e-31	2.31243e-29	motile cilium
GO:0042383	0	1	1	6.82744	9.74997e-31	2.39922e-29	sarcolemma
GO:0007369	0	1	1	4.08646	1.10053e-30	2.70253e-29	gastrulation
GO:0048821	0	1	1	301.839	1.37248e-30	3.33596e-29	erythrocyte development
GO:0061515	0	1	1	301.839	1.37248e-30	3.33596e-29	myeloid cell development
GO:0008093	0	1	1	301.839	1.37248e-30	3.33596e-29	cytoskeletal adaptor activity
GO:0030673	0	1	1	301.839	1.37248e-30	3.33596e-29	axolemma
GO:0032589	0	1	1	301.839	1.37248e-30	3.33596e-29	neuron projection membrane
GO:2001293	0	1	1	83.0059	1.63987e-30	3.96968e-29	malonyl-CoA metabolic process
GO:2001294	0	1	1	83.0059	1.63987e-30	3.96968e-29	malonyl-CoA catabolic process
GO:0035567	0	1	1	34.7574	2.28831e-30	5.51695e-29	non-canonical Wnt signaling pathway
GO:0018105	2.94132	0.0494443	1	1.97994	2.47886e-30	5.96428e-29	peptidyl-serine phosphorylation
GO:0010314	0	1	1	10.6204	3.96342e-30	9.51701e-29	phosphatidylinositol-5-phosphate binding
GO:0016124	0	1	1	10.2379	4.41077e-30	1.05275e-28	xanthophyll catabolic process
GO:0016118	0	1	1	10.2379	4.41077e-30	1.05275e-28	carotenoid catabolic process
GO:0016110	0	1	1	10.2379	4.41077e-30	1.05275e-28	tetraterpenoid catabolic process
GO:0016602	0	1	1	7.28943	4.42614e-30	1.05431e-28	CCAAT-binding factor complex
GO:0008274	0	1	1	26.8303	5.27378e-30	1.24872e-28	gamma-tubulin ring complex
GO:0000931	0	1	1	26.8303	5.27378e-30	1.24872e-28	gamma-tubulin large complex
GO:0031021	0	1	1	26.8303	5.27378e-30	1.24872e-28	interphase microtubule organizing center
GO:0051371	0	1	1	inf	5.93631e-30	1.29728e-28	muscle alpha-actinin binding
GO:0051393	0	1	1	inf	5.93631e-30	1.29728e-28	alpha-actinin binding
GO:0048644	0	1	1	inf	5.93631e-30	1.29728e-28	muscle organ morphogenesis
GO:0048769	0	1	1	inf	5.93631e-30	1.29728e-28	sarcomerogenesis
GO:0048747	0	1	1	inf	5.93631e-30	1.29728e-28	muscle fiber development
GO:0048739	0	1	1	inf	5.93631e-30	1.29728e-28	cardiac muscle fiber development
GO:0048738	0	1	1	inf	5.93631e-30	1.29728e-28	cardiac muscle tissue development
GO:0043056	0	1	1	inf	5.93631e-30	1.29728e-28	forward locomotion
GO:0042805	0	1	1	inf	5.93631e-30	1.29728e-28	actinin binding
GO:0036379	0	1	1	inf	5.93631e-30	1.29728e-28	myofilament
GO:0035995	0	1	1	inf	5.93631e-30	1.29728e-28	detection of muscle stretch
GO:0035994	0	1	1	inf	5.93631e-30	1.29728e-28	response to muscle stretch
GO:1901077	0	1	1	inf	5.93631e-30	1.29728e-28	regulation of relaxation of muscle
GO:1901897	0	1	1	inf	5.93631e-30	1.29728e-28	regulation of relaxation of cardiac muscle
GO:0097185	0	1	1	inf	5.93631e-30	1.29728e-28	cellular response to azide
GO:0097184	0	1	1	inf	5.93631e-30	1.29728e-28	response to azide
GO:0097493	0	1	1	inf	5.93631e-30	1.29728e-28	structural molecule activity conferring elasticity
GO:0055003	0	1	1	inf	5.93631e-30	1.29728e-28	cardiac myofibril assembly
GO:0055006	0	1	1	inf	5.93631e-30	1.29728e-28	cardiac cell development
GO:0055007	0	1	1	inf	5.93631e-30	1.29728e-28	cardiac muscle cell differentiation
GO:0055008	0	1	1	inf	5.93631e-30	1.29728e-28	cardiac muscle tissue morphogenesis
GO:0055013	0	1	1	inf	5.93631e-30	1.29728e-28	cardiac muscle cell development
GO:0052597	0	1	1	inf	5.93631e-30	1.29728e-28	diamine oxidase activity
GO:0060415	0	1	1	inf	5.93631e-30	1.29728e-28	muscle tissue morphogenesis
GO:0060419	0	1	1	inf	5.93631e-30	1.29728e-28	heart growth
GO:0071688	0	1	1	inf	5.93631e-30	1.29728e-28	striated muscle myosin thick filament assembly
GO:0007512	0	1	1	inf	5.93631e-30	1.29728e-28	adult heart development
GO:0003300	0	1	1	inf	5.93631e-30	1.29728e-28	cardiac muscle hypertrophy
GO:0005859	0	1	1	inf	5.93631e-30	1.29728e-28	muscle myosin complex
GO:0005865	0	1	1	inf	5.93631e-30	1.29728e-28	striated muscle thin filament
GO:0031433	0	1	1	inf	5.93631e-30	1.29728e-28	telethonin binding
GO:0030241	0	1	1	inf	5.93631e-30	1.29728e-28	skeletal muscle myosin thick filament assembly
GO:0030240	0	1	1	inf	5.93631e-30	1.29728e-28	skeletal muscle thin filament assembly
GO:0021591	0	1	1	inf	5.93631e-30	1.29728e-28	ventricular system development
GO:0030506	0	1	1	inf	5.93631e-30	1.29728e-28	ankyrin binding
GO:0035452	0	1	1	inf	5.93631e-30	1.29728e-28	extrinsic component of plastid membrane
GO:0035051	0	1	1	inf	5.93631e-30	1.29728e-28	cardiocyte differentiation
GO:0033058	0	1	1	inf	5.93631e-30	1.29728e-28	directional locomotion
GO:0014866	0	1	1	inf	5.93631e-30	1.29728e-28	skeletal myofibril assembly
GO:0014896	0	1	1	inf	5.93631e-30	1.29728e-28	muscle hypertrophy
GO:0014897	0	1	1	inf	5.93631e-30	1.29728e-28	striated muscle hypertrophy
GO:0010737	0	1	1	inf	5.93631e-30	1.29728e-28	protein kinase A signaling
GO:0018209	2.92404	0.0503148	1	1.96605	8.12168e-30	1.7716e-28	peptidyl-serine modification
GO:0043269	0	1	1	2.1429	1.88483e-29	4.09641e-28	regulation of ion transport
GO:0005875	2.63226	0.0682826	1	1.90048	2.07161e-29	4.49416e-28	microtubule associated complex
GO:0044403	0.655675	0.782447	1	1.89538	3.31788e-29	7.18472e-28	symbiotic process
GO:0030674	0	1	1	3.16225	4.63831e-29	1.00258e-27	protein binding, bridging
GO:0010087	0	1	1	1.83022	5.27453e-29	1.13804e-27	phloem or xylem histogenesis
GO:0007167	0.900134	0.650805	1	1.71663	6.04237e-29	1.30135e-27	enzyme linked receptor protein signaling pathway
GO:0043539	0	1	1	inf	6.56633e-29	1.4091e-27	protein serine/threonine kinase activator activity
GO:0061575	0	1	1	inf	6.56633e-29	1.4091e-27	cyclin-dependent protein serine/threonine kinase activator activity
GO:0046741	0	1	1	13.7985	9.48141e-29	2.031e-27	transport of virus in host, tissue to tissue
GO:0044419	0.608884	0.806499	1	1.84918	9.53597e-29	2.03902e-27	interspecies interaction between organisms
GO:0008171	0	1	1	2.58697	1.13395e-28	2.42031e-27	O-methyltransferase activity
GO:0009683	0	1	1	4.49176	1.41419e-28	3.01305e-27	indoleacetic acid metabolic process
GO:0070286	0	1	1	7.12686	1.82369e-28	3.8786e-27	axonemal dynein complex assembly
GO:0001227	0	1	1	5.62056	2.25703e-28	4.79167e-27	DNA-binding transcription repressor activity, RNA polymerase II-specific
GO:0052482	0	1	1	3.09281	3.23546e-28	6.84447e-27	defense response by cell wall thickening
GO:0052544	0	1	1	3.09281	3.23546e-28	6.84447e-27	defense response by callose deposition in cell wall
GO:0044447	0	1	1	6.87367	3.47622e-28	7.34073e-27	axoneme part
GO:0055067	0	1	1	2.13135	3.76449e-28	7.93542e-27	monovalent inorganic cation homeostasis
GO:0004713	0	1	1	5.11901	3.81869e-28	8.00714e-27	protein tyrosine kinase activity
GO:0018212	0	1	1	5.11901	3.81869e-28	8.00714e-27	peptidyl-tyrosine modification
GO:0018108	0	1	1	5.11901	3.81869e-28	8.00714e-27	peptidyl-tyrosine phosphorylation
GO:0005576	1.65995	0.0645573	1	1.36686	4.2606e-28	8.91805e-27	extracellular region
GO:0051289	0	1	1	3.23411	4.30146e-28	8.98779e-27	protein homotetramerization
GO:0065001	0	1	1	2.59576	4.71354e-28	9.83156e-27	specification of axis polarity
GO:0009741	0	1	1	1.85803	5.13495e-28	1.06918e-26	response to brassinosteroid
GO:0005623	1.13989	0.0373239	1	1.06998	5.74132e-28	1.19127e-26	cell
GO:0044464	1.13989	0.0373239	1	1.06998	5.74132e-28	1.19127e-26	cell part
GO:0080067	0	1	1	inf	7.2632e-28	1.48634e-26	4-methylthiobutyl-desulfoglucosinolate sulfotransferase activity
GO:0080068	0	1	1	inf	7.2632e-28	1.48634e-26	5-methylthiopentyl-desulfoglucosinolate sulfotransferase activity
GO:0080069	0	1	1	inf	7.2632e-28	1.48634e-26	7-methylthioheptyl-desulfoglucosinolate sulfotransferase activity
GO:0080070	0	1	1	inf	7.2632e-28	1.48634e-26	8-methylthiooctyl-desulfoglucosinolate sulfotransferase activity
GO:0080071	0	1	1	inf	7.2632e-28	1.48634e-26	indol-3-yl-methyl-desulfoglucosinolate sulfotransferase activity
GO:0080066	0	1	1	inf	7.2632e-28	1.48634e-26	3-methylthiopropyl-desulfoglucosinolate sulfotransferase activity
GO:0015115	0	1	1	inf	7.2632e-28	1.48634e-26	silicate transmembrane transporter activity
GO:0015708	0	1	1	inf	7.2632e-28	1.48634e-26	silicic acid import across plasma membrane
GO:0090440	0	1	1	8.84185	7.32897e-28	1.49722e-26	abscisic acid transmembrane transporter activity
GO:0016102	1.12607	0.588687	1	2.19461	1.06901e-27	2.18012e-26	diterpenoid biosynthetic process
GO:0046218	0	1	1	8.48034	1.15999e-27	2.35758e-26	indolalkylamine catabolic process
GO:0006569	0	1	1	8.48034	1.15999e-27	2.35758e-26	tryptophan catabolic process
GO:0042073	0	1	1	271.655	1.67829e-27	3.3994e-26	intraciliary transport
GO:0047268	0	1	1	271.655	1.67829e-27	3.3994e-26	galactinol-raffinose galactosyltransferase activity
GO:0050734	0	1	1	3.4331	1.73307e-27	3.50439e-26	hydroxycinnamoyltransferase activity
GO:0050559	0	1	1	13.6124	1.82848e-27	3.66003e-26	copalyl diphosphate synthase activity
GO:1901944	0	1	1	13.6124	1.82848e-27	3.66003e-26	miltiradiene metabolic process
GO:1901946	0	1	1	13.6124	1.82848e-27	3.66003e-26	miltiradiene biosynthetic process
GO:1901948	0	1	1	13.6124	1.82848e-27	3.66003e-26	5alpha,9alpha,10beta-labda-8(20),13-dien-15-yl diphosphate catabolic process
GO:1901949	0	1	1	13.6124	1.82848e-27	3.66003e-26	5alpha,9alpha,10beta-labda-8(20),13-dien-15-yl diphosphate biosynthetic process
GO:1901947	0	1	1	13.6124	1.82848e-27	3.66003e-26	5alpha,9alpha,10beta-labda-8(20),13-dien-15-yl diphosphate metabolic process
GO:0031123	0	1	1	1.98495	2.33617e-27	4.66842e-26	RNA 3'-end processing
GO:0010310	0	1	1	4.33084	2.41461e-27	4.81709e-26	regulation of hydrogen peroxide metabolic process
GO:0044036	0	1	1	1.75633	2.83905e-27	5.65435e-26	cell wall macromolecule metabolic process
GO:2000067	0	1	1	4.14536	3.49985e-27	6.9588e-26	regulation of root morphogenesis
GO:0045216	0	1	1	3.83298	4.21875e-27	8.36028e-26	cell-cell junction organization
GO:0034330	0	1	1	3.83298	4.21875e-27	8.36028e-26	cell junction organization
GO:0009926	0	1	1	2.07001	4.6458e-27	9.19127e-26	auxin polar transport
GO:0008909	0	1	1	51.9834	5.88449e-27	1.16226e-25	isochorismate synthase activity
GO:0003341	0	1	1	5.25794	6.59183e-27	1.29981e-25	cilium movement
GO:0016757	0	1	1	1.42516	7.69927e-27	1.51317e-25	transferase activity, transferring glycosyl groups
GO:0016722	0	1	1	2.59268	7.85561e-27	1.54136e-25	oxidoreductase activity, oxidizing metal ions
GO:0051642	0	1	1	18.2934	7.97416e-27	1.56204e-25	centrosome localization
GO:0009187	0	1	1	4.37062	8.42556e-27	1.64776e-25	cyclic nucleotide metabolic process
GO:0048314	0	1	1	60.3678	9.96618e-27	1.94586e-25	embryo sac morphogenesis
GO:0006624	0	1	1	5.41238	1.38398e-26	2.69773e-25	vacuolar protein processing
GO:0042445	0	1	1	1.49862	2.11913e-26	4.124e-25	hormone metabolic process
GO:0060402	0	1	1	11.8221	2.14782e-26	4.17301e-25	calcium ion transport into cytosol
GO:0044267	0.81275	0.884301	1	1.15577	2.51024e-26	4.86922e-25	cellular protein metabolic process
GO:0007611	0	1	1	4.27392	3.14219e-26	6.08512e-25	learning or memory
GO:0048507	1.12374	0.476293	1	1.51835	3.24863e-26	6.28103e-25	meristem development
GO:0042742	0.329356	0.983672	1	1.38651	4.16116e-26	8.03232e-25	defense response to bacterium
GO:0046854	0	1	1	2.86958	4.93096e-26	9.50287e-25	phosphatidylinositol phosphorylation
GO:0016138	0	1	1	5.90383	5.03201e-26	9.68195e-25	glycoside biosynthetic process
GO:0098581	0	1	1	4.91238	5.27403e-26	1.01149e-24	detection of external biotic stimulus
GO:0009595	0	1	1	4.91238	5.27403e-26	1.01149e-24	detection of biotic stimulus
GO:0080003	0	1	1	50.3065	5.45681e-26	1.04319e-24	thalianol metabolic process
GO:0010683	0	1	1	50.3065	5.45681e-26	1.04319e-24	tricyclic triterpenoid metabolic process
GO:0033177	0	1	1	5.59811	5.50968e-26	1.05161e-24	proton-transporting two-sector ATPase complex, proton-transporting domain
GO:0022898	0	1	1	2.72805	7.63214e-26	1.44776e-24	regulation of transmembrane transporter activity
GO:0032409	0	1	1	2.72805	7.63214e-26	1.44776e-24	regulation of transporter activity
GO:0032412	0	1	1	2.72805	7.63214e-26	1.44776e-24	regulation of ion transmembrane transporter activity
GO:0051536	0	1	1	2.15785	7.64605e-26	1.44776e-24	iron-sulfur cluster binding
GO:0051540	0	1	1	2.15785	7.64605e-26	1.44776e-24	metal cluster binding
GO:0009617	0.532149	0.941443	1	1.34222	8.4435e-26	1.59622e-24	response to bacterium
GO:0030142	0	1	1	inf	8.88666e-26	1.67469e-24	COPI-coated Golgi to ER transport vesicle
GO:0015886	0	1	1	inf	8.88666e-26	1.67469e-24	heme transport
GO:0071669	0.962737	0.596249	1	1.47099	9.68159e-26	1.82161e-24	plant-type cell wall organization or biogenesis
GO:0005847	0	1	1	4.36632	9.89132e-26	1.85813e-24	mRNA cleavage and polyadenylation specificity factor complex
GO:0043335	0	1	1	9.50242	1.17723e-25	2.208e-24	protein unfolding
GO:0043170	0.769101	0.979232	1	1.10763	1.25301e-25	2.34643e-24	macromolecule metabolic process
GO:0009068	0	1	1	11.5706	1.28591e-25	2.40428e-24	aspartate family amino acid catabolic process
GO:0051028	0	1	1	2.12983	1.41527e-25	2.63373e-24	mRNA transport
GO:0071427	0	1	1	2.12983	1.41527e-25	2.63373e-24	mRNA-containing ribonucleoprotein complex export from nucleus
GO:0006406	0	1	1	2.12983	1.41527e-25	2.63373e-24	mRNA export from nucleus
GO:1902265	0	1	1	23.4764	1.66046e-25	3.08519e-24	abscisic acid homeostasis
GO:0005763	0	1	1	4.79945	1.74792e-25	3.24263e-24	mitochondrial small ribosomal subunit
GO:0034293	0	1	1	2.30477	2.38107e-25	4.41035e-24	sexual sporulation
GO:0015385	0	1	1	6.78052	2.90475e-25	5.37198e-24	sodium:proton antiporter activity
GO:0004571	0	1	1	6.28839	4.44255e-25	8.20322e-24	mannosyl-oligosaccharide 1,2-alpha-mannosidase activity
GO:0005544	0	1	1	11.9649	6.11954e-25	1.12823e-23	calcium-dependent phospholipid binding
GO:0005929	0	1	1	2.42787	6.50085e-25	1.19668e-23	cilium
GO:0007568	0.748247	0.746407	1	1.58945	6.64376e-25	1.2211e-23	aging
GO:0097553	0	1	1	11.319	7.62331e-25	1.39898e-23	calcium ion transmembrane import into cytosol
GO:0016032	0	1	1	2.5803	8.07144e-25	1.47894e-23	viral process
GO:0003002	1.2514	0.396853	1	1.53238	8.14791e-25	1.49066e-23	regionalization
GO:0035580	0	1	1	inf	9.82977e-25	1.78464e-23	specific granule lumen
GO:0044245	0	1	1	inf	9.82977e-25	1.78464e-23	polysaccharide digestion
GO:1904724	0	1	1	inf	9.82977e-25	1.78464e-23	tertiary granule lumen
GO:0070820	0	1	1	inf	9.82977e-25	1.78464e-23	tertiary granule
GO:0007586	0	1	1	inf	9.82977e-25	1.78464e-23	digestion
GO:0000314	0	1	1	3.75054	1.06161e-24	1.92446e-23	organellar small ribosomal subunit
GO:0043197	0	1	1	9.48091	1.10764e-24	2.00181e-23	dendritic spine
GO:0044309	0	1	1	9.48091	1.10764e-24	2.00181e-23	neuron spine
GO:0071266	0	1	1	11.043	1.4579e-24	2.6229e-23	'de novo' L-methionine biosynthetic process
GO:0019346	0	1	1	11.043	1.4579e-24	2.6229e-23	transsulfuration
GO:0019343	0	1	1	11.043	1.4579e-24	2.6229e-23	cysteine biosynthetic process via cystathionine
GO:0008536	0	1	1	4.47763	1.78942e-24	3.21448e-23	Ran GTPase binding
GO:0005034	0	1	1	241.471	2.02885e-24	3.63909e-23	osmosensor activity
GO:0098794	0	1	1	3.74129	2.05559e-24	3.68151e-23	postsynapse
GO:0050136	0	1	1	4.24395	2.83104e-24	5.05512e-23	NADH dehydrogenase (quinone) activity
GO:0008137	0	1	1	4.24395	2.83104e-24	5.05512e-23	NADH dehydrogenase (ubiquinone) activity
GO:0051279	0	1	1	10.2849	3.08299e-24	5.47219e-23	regulation of release of sequestered calcium ion into cytosol
GO:0043855	0	1	1	10.2849	3.08299e-24	5.47219e-23	cyclic nucleotide-gated ion channel activity
GO:0005221	0	1	1	10.2849	3.08299e-24	5.47219e-23	intracellular cyclic nucleotide activated cation channel activity
GO:0010522	0	1	1	10.2849	3.08299e-24	5.47219e-23	regulation of calcium ion transport into cytosol
GO:0043954	0	1	1	5.20912	3.1316e-24	5.55019e-23	cellular component maintenance
GO:1900424	0	1	1	2.1493	6.21282e-24	1.09947e-22	regulation of defense response to bacterium
GO:0015085	0	1	1	2.13485	7.36627e-24	1.30167e-22	calcium ion transmembrane transporter activity
GO:0009237	0	1	1	17.248	8.18169e-24	1.43935e-22	siderophore metabolic process
GO:0033707	0	1	1	17.248	8.18169e-24	1.43935e-22	3''-deamino-3''-oxonicotianamine reductase activity
GO:0019290	0	1	1	17.248	8.18169e-24	1.43935e-22	siderophore biosynthetic process
GO:0071555	1.5557	0.222089	1	1.51753	8.51212e-24	1.49527e-22	cell wall organization
GO:0034647	0	1	1	9.45768	1.04284e-23	1.8265e-22	histone demethylase activity (H3-trimethyl-K4 specific)
GO:0034721	0	1	1	9.45768	1.04284e-23	1.8265e-22	histone H3-K4 demethylation, trimethyl-H3-K4-specific
GO:0033473	0	1	1	inf	1.0873e-23	1.90157e-22	indoleacetic acid conjugate metabolic process
GO:0009798	0	1	1	2.04978	1.12607e-23	1.96649e-22	axis specification
GO:0016103	0	1	1	4.93078	1.92999e-23	3.36547e-22	diterpenoid catabolic process
GO:0044441	0	1	1	2.60624	2.15363e-23	3.74448e-22	ciliary part
GO:0010342	0	1	1	11.421	2.19514e-23	3.8111e-22	endosperm cellularization
GO:0033198	0	1	1	17.6073	2.35349e-23	4.08006e-22	response to ATP
GO:0009270	0	1	1	11.7861	3.45018e-23	5.97262e-22	response to humidity
GO:0045764	0	1	1	4.47176	4.18237e-23	7.21913e-22	positive regulation of cellular amino acid metabolic process
GO:0033240	0	1	1	4.47176	4.18237e-23	7.21913e-22	positive regulation of cellular amine metabolic process
GO:0005813	0	1	1	2.55728	4.62263e-23	7.96751e-22	centrosome
GO:0010930	0	1	1	16.7689	5.72521e-23	9.85365e-22	negative regulation of auxin mediated signaling pathway
GO:0006885	0	1	1	2.32373	6.75723e-23	1.16131e-21	regulation of pH
GO:0036290	0	1	1	8.75711	9.3014e-23	1.59625e-21	protein trans-autophosphorylation
GO:0010075	2.41311	0.20185	1	2.09481	9.65264e-23	1.65414e-21	regulation of meristem growth
GO:0004528	0	1	1	15.092	1.04992e-22	1.79663e-21	phosphodiesterase I activity
GO:0070070	0	1	1	6.18357	1.2066e-22	2.05587e-21	proton-transporting V-type ATPase complex assembly
GO:0070072	0	1	1	6.18357	1.2066e-22	2.05587e-21	vacuolar proton-transporting V-type ATPase complex assembly
GO:0007389	1.05687	0.523506	1	1.45922	1.23824e-22	2.10677e-21	pattern specification process
GO:0051282	0	1	1	6.62868	1.24435e-22	2.11414e-21	regulation of sequestering of calcium ion
GO:0051198	0	1	1	29.1778	1.36786e-22	2.31409e-21	negative regulation of coenzyme metabolic process
GO:0046137	0	1	1	29.1778	1.36786e-22	2.31409e-21	negative regulation of vitamin metabolic process
GO:2000083	0	1	1	29.1778	1.36786e-22	2.31409e-21	negative regulation of L-ascorbic acid biosynthetic process
GO:0019789	0	1	1	3.94481	1.47714e-22	2.49542e-21	SUMO transferase activity
GO:0050890	0	1	1	3.65531	1.65731e-22	2.79584e-21	cognition
GO:0004652	0	1	1	3.97045	1.79563e-22	3.02488e-21	polynucleotide adenylyltransferase activity
GO:0009725	1.03272	0.463048	1	1.17034	2.47197e-22	4.15836e-21	response to hormone
GO:0007610	0	1	1	2.81073	2.79514e-22	4.68874e-21	behavior
GO:0045211	0	1	1	3.93516	2.88709e-22	4.82938e-21	postsynaptic membrane
GO:0097060	0	1	1	3.93516	2.88709e-22	4.82938e-21	synaptic membrane
GO:0006816	0	1	1	2.02469	3.60661e-22	6.02451e-21	calcium ion transport
GO:0043934	0	1	1	2.12933	3.72302e-22	6.21026e-21	sporulation
GO:0048764	0	1	1	1.63205	5.03609e-22	8.37707e-21	trichoblast maturation
GO:0048765	0	1	1	1.63205	5.03609e-22	8.37707e-21	root hair cell differentiation
GO:0002366	0	1	1	3.12906	5.10194e-22	8.46297e-21	leukocyte activation involved in immune response
GO:0002263	0	1	1	3.12906	5.10194e-22	8.46297e-21	cell activation involved in immune response
GO:0010065	0	1	1	3.03603	5.37719e-22	8.90713e-21	primary meristem tissue development
GO:0009817	0	1	1	2.05343	7.60958e-22	1.25875e-20	defense response to fungus, incompatible interaction
GO:0005200	0	1	1	2.55152	7.7151e-22	1.27444e-20	structural constituent of cytoskeleton
GO:0044550	1.72943	0.138559	1	1.47046	8.98582e-22	1.48229e-20	secondary metabolite biosynthetic process
GO:0048236	0	1	1	2.33441	1.04491e-21	1.72128e-20	plant-type sporogenesis
GO:0046321	0	1	1	16.6012	1.1577e-21	1.90444e-20	positive regulation of fatty acid oxidation
GO:0008658	0	1	1	inf	1.33032e-21	2.18239e-20	penicillin binding
GO:0010542	0	1	1	inf	1.33032e-21	2.18239e-20	nitrate efflux transmembrane transporter activity
GO:1902229	0	1	1	10.8998	2.31818e-21	3.79774e-20	regulation of intrinsic apoptotic signaling pathway in response to DNA damage
GO:0035145	0	1	1	4.69534	2.43165e-21	3.97814e-20	exon-exon junction complex
GO:0009719	1.00874	0.509435	1	1.1639	2.57064e-21	4.19976e-20	response to endogenous stimulus
GO:1903793	0	1	1	7.54602	2.6414e-21	4.30946e-20	positive regulation of anion transport
GO:1904666	0	1	1	6.62268	4.07427e-21	6.63811e-20	regulation of ubiquitin protein ligase activity
GO:0005858	0	1	1	14.2535	4.59019e-21	7.46847e-20	axonemal dynein complex
GO:0004557	0	1	1	5.38373	4.6095e-21	7.48966e-20	alpha-galactosidase activity
GO:0052542	0	1	1	2.53174	4.62472e-21	7.50415e-20	defense response by callose deposition
GO:0016605	0	1	1	4.91892	4.83224e-21	7.83021e-20	PML body
GO:0065008	0.820053	0.810249	1	1.19046	4.8835e-21	7.90251e-20	regulation of biological quality
GO:0010054	0	1	1	1.60549	6.44747e-21	1.04051e-19	trichoblast differentiation
GO:1901136	0	1	1	2.10399	6.44747e-21	1.04051e-19	carbohydrate derivative catabolic process
GO:0016707	0	1	1	8.35282	7.4634e-21	1.20283e-19	gibberellin 3-beta-dioxygenase activity
GO:0042868	0	1	1	10.3261	8.02637e-21	1.29181e-19	antisense RNA metabolic process
GO:0050728	0	1	1	12.0736	9.25721e-21	1.4879e-19	negative regulation of inflammatory response
GO:0009956	0	1	1	2.79367	1.31805e-20	2.11564e-19	radial pattern formation
GO:0070588	0	1	1	1.98557	2.2324e-20	3.57844e-19	calcium ion transmembrane transport
GO:0097064	0	1	1	4.59179	2.26936e-20	3.6328e-19	ncRNA export from nucleus
GO:0048598	0	1	1	1.82628	2.68621e-20	4.28858e-19	embryonic morphogenesis
GO:0002694	0	1	1	4.00405	2.78399e-20	4.43874e-19	regulation of leukocyte activation
GO:0006450	0	1	1	6.22847	2.99023e-20	4.76118e-19	regulation of translational fidelity
GO:0007043	0	1	1	5.90559	3.45924e-20	5.5006e-19	cell-cell junction assembly
GO:2000027	0	1	1	4.12354	3.7924e-20	6.02233e-19	regulation of animal organ morphogenesis
GO:0046593	0	1	1	4.50116	5.23872e-20	8.30802e-19	mandelonitrile lyase activity
GO:0060090	0	1	1	2.46342	5.39626e-20	8.54648e-19	molecular adaptor activity
GO:0098590	0	1	1	2.06395	5.55813e-20	8.79115e-19	plasma membrane region
GO:0000049	0	1	1	2.73435	5.84249e-20	9.22865e-19	tRNA binding
GO:0050162	0	1	1	46.2818	6.14172e-20	9.67565e-19	oxalate oxidase activity
GO:1902693	0	1	1	46.2818	6.14172e-20	9.67565e-19	superoxide dismutase complex
GO:0003008	0	1	1	2.26077	6.19556e-20	9.74758e-19	system process
GO:0015299	0	1	1	3.18562	7.68565e-20	1.20601e-18	solute:proton antiporter activity
GO:0019538	0.896006	0.760539	1	1.12637	7.88089e-20	1.23502e-18	protein metabolic process
GO:0042162	0	1	1	2.32718	8.83528e-20	1.38276e-18	telomeric DNA binding
GO:0051438	0	1	1	5.07297	8.89013e-20	1.38952e-18	regulation of ubiquitin-protein transferase activity
GO:0009892	1.14291	0.345282	1	1.22618	1.00422e-19	1.56754e-18	negative regulation of metabolic process
GO:0071456	0	1	1	2.89269	1.21311e-19	1.89112e-18	cellular response to hypoxia
GO:0045190	0	1	1	8.41867	1.27114e-19	1.94842e-18	isotype switching
GO:0002204	0	1	1	8.41867	1.27114e-19	1.94842e-18	somatic recombination of immunoglobulin genes involved in immune response
GO:0002285	0	1	1	8.41867	1.27114e-19	1.94842e-18	lymphocyte activation involved in immune response
GO:0002312	0	1	1	8.41867	1.27114e-19	1.94842e-18	B cell activation involved in immune response
GO:0002381	0	1	1	8.41867	1.27114e-19	1.94842e-18	immunoglobulin production involved in immunoglobulin mediated immune response
GO:0002449	0	1	1	8.41867	1.27114e-19	1.94842e-18	lymphocyte mediated immunity
GO:0002460	0	1	1	8.41867	1.27114e-19	1.94842e-18	adaptive immune response based on somatic recombination of immune receptors built from immunoglobulin superfamily domains
GO:0002208	0	1	1	8.41867	1.27114e-19	1.94842e-18	somatic diversification of immunoglobulins involved in immune response
GO:0002250	0	1	1	8.41867	1.27114e-19	1.94842e-18	adaptive immune response
GO:0002562	0	1	1	8.41867	1.27114e-19	1.94842e-18	somatic diversification of immune receptors via germline recombination within a single locus
GO:0019724	0	1	1	8.41867	1.27114e-19	1.94842e-18	B cell mediated immunity
GO:0016064	0	1	1	8.41867	1.27114e-19	1.94842e-18	immunoglobulin mediated immune response
GO:0016447	0	1	1	8.41867	1.27114e-19	1.94842e-18	somatic recombination of immunoglobulin gene segments
GO:0005938	0.472769	0.879386	1	1.5806	1.34316e-19	2.05617e-18	cell cortex
GO:0015924	0	1	1	4.60558	1.34914e-19	2.06268e-18	mannosyl-oligosaccharide mannosidase activity
GO:0045939	0	1	1	inf	1.62766e-19	2.46949e-18	negative regulation of steroid metabolic process
GO:0090032	0	1	1	inf	1.62766e-19	2.46949e-18	negative regulation of steroid hormone biosynthetic process
GO:0010894	0	1	1	inf	1.62766e-19	2.46949e-18	negative regulation of steroid biosynthetic process
GO:0010370	0	1	1	inf	1.62766e-19	2.46949e-18	perinucleolar chromocenter
GO:0010585	0	1	1	inf	1.62766e-19	2.46949e-18	glutamine secretion
GO:0010423	0	1	1	inf	1.62766e-19	2.46949e-18	negative regulation of brassinosteroid biosynthetic process
GO:0071712	0	1	1	3.9416	1.72258e-19	2.61017e-18	ER-associated misfolded protein catabolic process
GO:0002697	0	1	1	2.75628	1.77257e-19	2.68251e-18	regulation of immune effector process
GO:0061053	0	1	1	7.97314	1.86671e-19	2.82138e-18	somite development
GO:0046434	0	1	1	1.83278	1.99215e-19	3.00716e-18	organophosphate catabolic process
GO:0071446	0	1	1	2.10169	2.43715e-19	3.67423e-18	cellular response to salicylic acid stimulus
GO:0051019	0	1	1	12.2972	2.65088e-19	3.99141e-18	mitogen-activated protein kinase binding
GO:0006937	0	1	1	7.07439	2.73907e-19	4.11897e-18	regulation of muscle contraction
GO:0045851	0	1	1	3.18073	2.89866e-19	4.35347e-18	pH reduction
GO:0042391	0	1	1	2.28011	3.03783e-19	4.55675e-18	regulation of membrane potential
GO:0004559	0	1	1	3.69228	4.58234e-19	6.86486e-18	alpha-mannosidase activity
GO:0080168	0	1	1	4.75772	5.0447e-19	7.54803e-18	abscisic acid transport
GO:0031463	0	1	1	3.37914	5.31094e-19	7.93642e-18	Cul3-RING ubiquitin ligase complex
GO:0048469	0	1	1	1.56528	5.61717e-19	8.38353e-18	cell maturation
GO:0098589	0	1	1	7.93298	5.66202e-19	8.43988e-18	membrane region
GO:2001020	0	1	1	2.0992	5.95051e-19	8.85882e-18	regulation of response to DNA damage stimulus
GO:0044732	0	1	1	8.21333	6.42557e-19	9.55412e-18	mitotic spindle pole body
GO:0035637	0	1	1	6.86001	6.48211e-19	9.61419e-18	multicellular organismal signaling
GO:0014704	0	1	1	6.86001	6.48211e-19	9.61419e-18	intercalated disc
GO:0099516	0	1	1	2.33082	7.03851e-19	1.04265e-17
GO:0000350	0	1	1	8.53026	7.09071e-19	1.04907e-17	generation of catalytic spliceosome for second transesterification step
GO:0043565	0.540799	0.952714	1	1.25366	1.28626e-18	1.90066e-17	sequence-specific DNA binding
GO:0002831	0	1	1	1.63542	1.442e-18	2.12815e-17	regulation of response to biotic stimulus
GO:0000956	0	1	1	1.7629	1.6832e-18	2.48106e-17	nuclear-transcribed mRNA catabolic process
GO:0005432	0	1	1	6.42808	1.72351e-18	2.53733e-17	calcium:sodium antiporter activity
GO:0035518	0	1	1	inf	1.8004e-18	2.64399e-17	histone H2A monoubiquitination
GO:0019010	0	1	1	inf	1.8004e-18	2.64399e-17	farnesoic acid O-methyltransferase activity
GO:0009987	0.913427	0.851822	1	1.0638	2.01204e-18	2.95115e-17	cellular process
GO:0016413	3.50321	0.11266	1	2.18945	2.3895e-18	3.50049e-17	O-acetyltransferase activity
GO:0006403	0	1	1	1.65837	2.73365e-18	3.99972e-17	RNA localization
GO:0010411	0	1	1	2.89815	2.75542e-18	4.02663e-17	xyloglucan metabolic process
GO:0090311	0	1	1	6.14134	2.82285e-18	4.11508e-17	regulation of protein deacetylation
GO:0031063	0	1	1	6.14134	2.82285e-18	4.11508e-17	regulation of histone deacetylation
GO:0006419	0	1	1	5.65245	3.24797e-18	4.72323e-17	alanyl-tRNA aminoacylation
GO:0004813	0	1	1	5.65245	3.24797e-18	4.72323e-17	alanine-tRNA ligase activity
GO:0052545	1.43998	0.500859	1	2.05239	3.28371e-18	4.76938e-17	callose localization
GO:0046864	0	1	1	4.51283	3.70434e-18	5.36724e-17	isoprenoid transport
GO:0046865	0	1	1	4.51283	3.70434e-18	5.36724e-17	terpenoid transport
GO:0034329	0	1	1	5.03069	3.86709e-18	5.59625e-17	cell junction assembly
GO:0080165	0	1	1	10.0613	4.06875e-18	5.88092e-17	callose deposition in phloem sieve plate
GO:0036513	0	1	1	4.04838	4.32701e-18	6.23914e-17	Derlin-1 retrotranslocation complex
GO:1902476	0	1	1	3.24446	4.3323e-18	6.23914e-17	chloride transmembrane transport
GO:0015108	0	1	1	3.24446	4.3323e-18	6.23914e-17	chloride transmembrane transporter activity
GO:0032101	0	1	1	1.56845	4.38533e-18	6.30789e-17	regulation of response to external stimulus
GO:0042138	0	1	1	4.34156	4.76452e-18	6.84504e-17	meiotic DNA double-strand break formation
GO:0030244	0	1	1	2.13781	5.16751e-18	7.41506e-17	cellulose biosynthetic process
GO:0046348	0	1	1	5.98587	5.99877e-18	8.56658e-17	amino sugar catabolic process
GO:1901072	0	1	1	5.98587	5.99877e-18	8.56658e-17	glucosamine-containing compound catabolic process
GO:0006030	0	1	1	5.98587	5.99877e-18	8.56658e-17	chitin metabolic process
GO:0006032	0	1	1	5.98587	5.99877e-18	8.56658e-17	chitin catabolic process
GO:1902074	0	1	1	2.68767	6.3892e-18	9.11321e-17	response to salt
GO:0010410	0	1	1	1.85778	6.4299e-18	9.1603e-17	hemicellulose metabolic process
GO:1990440	0	1	1	10.3757	6.87827e-18	9.78735e-17	positive regulation of transcription from RNA polymerase II promoter in response to endoplasmic reticulum stress
GO:0003714	0	1	1	2.29811	7.10294e-18	1.0095e-16	transcription corepressor activity
GO:0009554	0	1	1	3.31482	8.25678e-18	1.17209e-16	megasporogenesis
GO:0071236	0	1	1	1.81177	8.44194e-18	1.19695e-16	cellular response to antibiotic
GO:0050877	0	1	1	2.42805	9.04116e-18	1.28038e-16	nervous system process
GO:0045229	1.2912	0.346431	1	1.39212	9.41635e-18	1.33193e-16	external encapsulating structure organization
GO:0051274	0	1	1	2.08889	9.52151e-18	1.34521e-16	beta-glucan biosynthetic process
GO:0009970	0	1	1	3.60693	9.79113e-18	1.38166e-16	cellular response to sulfate starvation
GO:0009684	0	1	1	3.50354	1.41299e-17	1.99156e-16	indoleacetic acid biosynthetic process
GO:0035725	0	1	1	2.63836	1.48866e-17	2.09326e-16	sodium ion transmembrane transport
GO:0015081	0	1	1	2.63836	1.48866e-17	2.09326e-16	sodium ion transmembrane transporter activity
GO:0030243	0	1	1	2.00459	1.98857e-17	2.78963e-16	cellulose metabolic process
GO:0016641	0	1	1	4.03698	2.57456e-17	3.60742e-16	oxidoreductase activity, acting on the CH-NH2 group of donors, oxygen as acceptor
GO:0045793	0	1	1	6.36232	2.88822e-17	4.04215e-16	positive regulation of cell size
GO:0008251	0	1	1	7.92061	2.95578e-17	4.13185e-16	tRNA-specific adenosine deaminase activity
GO:0005049	0	1	1	3.61815	3.69444e-17	5.15835e-16	nuclear export signal receptor activity
GO:2000377	0	1	1	1.92799	4.46644e-17	6.22896e-16	regulation of reactive oxygen species metabolic process
GO:0000276	0	1	1	7.7556	4.77507e-17	6.65159e-16	mitochondrial proton-transporting ATP synthase complex, coupling factor F(o)
GO:0051453	0	1	1	2.44486	6.28585e-17	8.73564e-16	regulation of intracellular pH
GO:0030641	0	1	1	2.44486	6.28585e-17	8.73564e-16	regulation of cellular pH
GO:0061842	0	1	1	6.82124	6.34979e-17	8.81422e-16	microtubule organizing center localization
GO:0036294	0	1	1	2.53634	7.22363e-17	1.00039e-15	cellular response to decreased oxygen levels
GO:0071453	0	1	1	2.53634	7.22363e-17	1.00039e-15	cellular response to oxygen levels
GO:0015079	0	1	1	1.77375	7.67264e-17	1.06134e-15	potassium ion transmembrane transporter activity
GO:0071050	0	1	1	7.00699	8.02389e-17	1.10864e-15	snoRNA polyadenylation
GO:2001234	0	1	1	4.5075	8.76738e-17	1.20996e-15	negative regulation of apoptotic signaling pathway
GO:0030104	0	1	1	2.74404	9.13671e-17	1.25947e-15	water homeostasis
GO:0032352	0	1	1	3.02853	9.69739e-17	1.33521e-15	positive regulation of hormone metabolic process
GO:0051568	0	1	1	2.22947	1.10254e-16	1.51631e-15	histone H3-K4 methylation
GO:0010453	0	1	1	2.79948	1.14499e-16	1.57287e-15	regulation of cell fate commitment
GO:0008092	0	1	1	1.39717	1.18657e-16	1.62812e-15	cytoskeletal protein binding
GO:0010383	0	1	1	1.6325	1.34437e-16	1.84252e-15	cell wall polysaccharide metabolic process
GO:0060401	0	1	1	5.2494	1.38309e-16	1.8934e-15	cytosolic calcium ion transport
GO:0050865	0	1	1	3.29815	1.43706e-16	1.96503e-15	regulation of cell activation
GO:0004123	0	1	1	5.50978	1.45298e-16	1.98451e-15	cystathionine gamma-lyase activity
GO:0007612	0	1	1	4.21008	1.60032e-16	2.18325e-15	learning
GO:0048577	0	1	1	4.40185	1.9872e-16	2.70795e-15	negative regulation of short-day photoperiodism, flowering
GO:0035965	0	1	1	8.73744	2.06037e-16	2.80446e-15	cardiolipin acyl-chain remodeling
GO:0044364	0	1	1	inf	2.2028e-16	2.98808e-15	disruption of cells of other organism
GO:0001906	0	1	1	inf	2.2028e-16	2.98808e-15	cell killing
GO:0031640	0	1	1	inf	2.2028e-16	2.98808e-15	killing of cells of other organism
GO:0060070	0	1	1	6.95146	2.38914e-16	3.23716e-15	canonical Wnt signaling pathway
GO:0031397	0	1	1	4.52761	2.63509e-16	3.56636e-15	negative regulation of protein ubiquitination
GO:0050670	0	1	1	6.6507	2.84952e-16	3.83478e-15	regulation of lymphocyte proliferation
GO:0050671	0	1	1	6.6507	2.84952e-16	3.83478e-15	positive regulation of lymphocyte proliferation
GO:0070665	0	1	1	6.6507	2.84952e-16	3.83478e-15	positive regulation of leukocyte proliferation
GO:0032944	0	1	1	6.6507	2.84952e-16	3.83478e-15	regulation of mononuclear cell proliferation
GO:0032946	0	1	1	6.6507	2.84952e-16	3.83478e-15	positive regulation of mononuclear cell proliferation
GO:0030124	0	1	1	5.67563	2.88515e-16	3.87835e-15	AP-4 adaptor complex
GO:0015935	0	1	1	1.70074	2.91553e-16	3.91477e-15	small ribosomal subunit
GO:0031349	0.553682	0.835716	1	1.56363	3.30329e-16	4.42961e-15	positive regulation of defense response
GO:0009627	0	1	1	1.796	3.3064e-16	4.42961e-15	systemic acquired resistance
GO:0030507	0	1	1	6.15693	3.60554e-16	4.82494e-15	spectrin binding
GO:0198738	0	1	1	6.82732	3.65849e-16	4.87935e-15	cell-cell signaling by wnt
GO:1905114	0	1	1	6.82732	3.65849e-16	4.87935e-15	cell surface receptor signaling pathway involved in cell-cell signaling
GO:0016055	0	1	1	6.82732	3.65849e-16	4.87935e-15	Wnt signaling pathway
GO:0004518	1.71604	0.0338013	1	1.24005	3.82761e-16	5.09919e-15	nuclease activity
GO:0006405	0	1	1	1.64814	4.00933e-16	5.33532e-15	RNA export from nucleus
GO:0033037	1.37623	0.516656	1	1.94405	4.33048e-16	5.75625e-15	polysaccharide localization
GO:0005451	0	1	1	3.60092	5.18381e-16	6.87519e-15	monovalent cation:proton antiporter activity
GO:0015386	0	1	1	3.60092	5.18381e-16	6.87519e-15	potassium:proton antiporter activity
GO:0050434	0	1	1	8.30057	5.781e-16	7.6502e-15	positive regulation of viral transcription
GO:0046782	0	1	1	8.30057	5.781e-16	7.6502e-15	regulation of viral transcription
GO:0051647	0	1	1	3.16896	5.86698e-16	7.74675e-15	nucleus localization
GO:0007097	0	1	1	3.16896	5.86698e-16	7.74675e-15	nuclear migration
GO:0050667	0	1	1	4.88125	6.19769e-16	8.17436e-15	homocysteine metabolic process
GO:0071426	0	1	1	1.68142	6.32237e-16	8.32038e-15	ribonucleoprotein complex export from nucleus
GO:0071166	0	1	1	1.68142	6.32237e-16	8.32038e-15	ribonucleoprotein complex localization
GO:0048645	0	1	1	6.89386	7.10557e-16	9.16873e-15	animal organ formation
GO:0042478	0	1	1	6.89386	7.10557e-16	9.16873e-15	regulation of eye photoreceptor cell development
GO:0046532	0	1	1	6.89386	7.10557e-16	9.16873e-15	regulation of photoreceptor cell differentiation
GO:0045610	0	1	1	6.89386	7.10557e-16	9.16873e-15	regulation of hemocyte differentiation
GO:0045611	0	1	1	6.89386	7.10557e-16	9.16873e-15	negative regulation of hemocyte differentiation
GO:0045613	0	1	1	6.89386	7.10557e-16	9.16873e-15	regulation of plasmatocyte differentiation
GO:0045614	0	1	1	6.89386	7.10557e-16	9.16873e-15	negative regulation of plasmatocyte differentiation
GO:0045747	0	1	1	6.89386	7.10557e-16	9.16873e-15	positive regulation of Notch signaling pathway
GO:0045314	0	1	1	6.89386	7.10557e-16	9.16873e-15	regulation of compound eye photoreceptor development
GO:0060582	0	1	1	6.89386	7.10557e-16	9.16873e-15	cell fate determination involved in pattern specification
GO:0007398	0	1	1	6.89386	7.10557e-16	9.16873e-15	ectoderm development
GO:0007616	0	1	1	6.89386	7.10557e-16	9.16873e-15	long-term memory
GO:0007498	0	1	1	6.89386	7.10557e-16	9.16873e-15	mesoderm development
GO:0008052	0	1	1	6.89386	7.10557e-16	9.16873e-15	sensory organ boundary specification
GO:0010160	0	1	1	6.89386	7.10557e-16	9.16873e-15	formation of animal organ boundary
GO:0035203	0	1	1	6.89386	7.10557e-16	9.16873e-15	regulation of lamellocyte differentiation
GO:0035204	0	1	1	6.89386	7.10557e-16	9.16873e-15	negative regulation of lamellocyte differentiation
GO:0016360	0	1	1	6.89386	7.10557e-16	9.16873e-15	sensory organ precursor cell fate determination
GO:0051031	0	1	1	5.97847	7.66555e-16	9.8806e-15	tRNA transport
GO:0000976	1.57229	0.298659	1	1.5386	7.77644e-16	1.00127e-14	transcription regulatory region sequence-specific DNA binding
GO:2000068	0	1	1	3.1106	9.17751e-16	1.18039e-14	regulation of defense response to insect
GO:0051213	0	1	1	1.73372	1.00074e-15	1.28573e-14	dioxygenase activity
GO:0015672	0	1	1	1.41798	1.09198e-15	1.40145e-14	monovalent inorganic cation transport
GO:0007267	2.09251	0.380202	1	2.19177	1.13649e-15	1.45701e-14	cell-cell signaling
GO:0007263	0	1	1	5.08595	1.448e-15	1.85438e-14	nitric oxide mediated signal transduction
GO:0003959	0	1	1	5.20414	1.53172e-15	1.95949e-14	NADPH dehydrogenase activity
GO:0051403	0	1	1	7.90531	1.5517e-15	1.98079e-14	stress-activated MAPK cascade
GO:0007254	0	1	1	7.90531	1.5517e-15	1.98079e-14	JNK cascade
GO:2001222	0	1	1	5.33372	1.59395e-15	2.03254e-14	regulation of neuron migration
GO:0010928	0	1	1	1.78059	1.90586e-15	2.42768e-14	regulation of auxin mediated signaling pathway
GO:0006402	0	1	1	1.62167	1.92182e-15	2.4454e-14	mRNA catabolic process
GO:0070542	0	1	1	5.91842	2.20343e-15	2.79775e-14	response to fatty acid
GO:0071398	0	1	1	5.91842	2.20343e-15	2.79775e-14	cellular response to fatty acid
GO:0006259	0.488574	0.962623	1	1.24128	2.40891e-15	3.05539e-14	DNA metabolic process
GO:0080184	0	1	1	inf	2.43657e-15	3.0839e-14	response to phenylpropanoid
GO:0001786	0	1	1	inf	2.43657e-15	3.0839e-14	phosphatidylserine binding
GO:0052543	1.73402	0.438497	1	2.04847	2.4812e-15	3.13706e-14	callose deposition in cell wall
GO:0008843	0	1	1	7.04291	2.66548e-15	3.36648e-14	endochitinase activity
GO:0070838	1.09802	0.543641	1	1.53927	3.19478e-15	4.03071e-14	divalent metal ion transport
GO:0016998	0	1	1	2.67941	3.26089e-15	4.10976e-14	cell wall macromolecule catabolic process
GO:0051273	0	1	1	1.82722	3.27004e-15	4.11694e-14	beta-glucan metabolic process
GO:0052386	1.72713	0.439785	1	2.0387	3.5729e-15	4.49348e-14	cell wall thickening
GO:0000122	0	1	1	1.90053	3.60434e-15	4.52824e-14	negative regulation of transcription by RNA polymerase II
GO:0051148	0	1	1	7.54597	3.99717e-15	4.99018e-14	negative regulation of muscle cell differentiation
GO:0051151	0	1	1	7.54597	3.99717e-15	4.99018e-14	negative regulation of smooth muscle cell differentiation
GO:0051150	0	1	1	7.54597	3.99717e-15	4.99018e-14	regulation of smooth muscle cell differentiation
GO:0034034	0	1	1	7.54597	3.99717e-15	4.99018e-14	purine nucleoside bisphosphate catabolic process
GO:0034031	0	1	1	7.54597	3.99717e-15	4.99018e-14	ribonucleoside bisphosphate catabolic process
GO:0033869	0	1	1	7.54597	3.99717e-15	4.99018e-14	nucleoside bisphosphate catabolic process
GO:0080142	0	1	1	5.14766	4.22715e-15	5.27177e-14	regulation of salicylic acid biosynthetic process
GO:0010929	0	1	1	2.74403	4.85947e-15	6.05401e-14	positive regulation of auxin mediated signaling pathway
GO:0010941	0.706053	0.774434	1	1.41982	5.03476e-15	6.26583e-14	regulation of cell death
GO:0018958	0	1	1	2.05492	5.95576e-15	7.40429e-14	phenol-containing compound metabolic process
GO:0002097	0	1	1	3.27688	6.0995e-15	7.57508e-14	tRNA wobble base modification
GO:0052635	0	1	1	9.11804	6.30863e-15	7.82665e-14	C-20 gibberellin 2-beta-dioxygenase activity
GO:0051236	0	1	1	1.60487	7.84556e-15	9.70308e-14	establishment of RNA localization
GO:0050658	0	1	1	1.60487	7.84556e-15	9.70308e-14	RNA transport
GO:0050657	0	1	1	1.60487	7.84556e-15	9.70308e-14	nucleic acid transport
GO:1903169	0	1	1	4.48187	8.26772e-15	1.02146e-13	regulation of calcium ion transmembrane transport
GO:1901529	0	1	1	5.9739	8.69747e-15	1.07233e-13	positive regulation of anion channel activity
GO:1903961	0	1	1	5.9739	8.69747e-15	1.07233e-13	positive regulation of anion transmembrane transport
GO:0031503	0	1	1	1.60651	9.06025e-15	1.1159e-13	protein-containing complex localization
GO:0006611	0	1	1	1.62958	1.19318e-14	1.46806e-13	protein export from nucleus
GO:0043112	0	1	1	4.33679	1.22232e-14	1.50235e-13	receptor metabolic process
GO:0044242	0	1	1	1.56097	1.2995e-14	1.59557e-13	cellular lipid catabolic process
GO:0030001	1.01127	0.557867	1	1.34428	1.36757e-14	1.67742e-13	metal ion transport
GO:0009261	0	1	1	7.06431	1.53947e-14	1.88246e-13	ribonucleotide catabolic process
GO:0009154	0	1	1	7.06431	1.53947e-14	1.88246e-13	purine ribonucleotide catabolic process
GO:0030514	0	1	1	7.06431	1.53947e-14	1.88246e-13	negative regulation of BMP signaling pathway
GO:0071804	0	1	1	1.6799	1.55903e-14	1.90246e-13
GO:0071805	0	1	1	1.6799	1.55903e-14	1.90246e-13	potassium ion transmembrane transport
GO:1901658	0	1	1	2.17504	1.63261e-14	1.99022e-13	glycosyl compound catabolic process
GO:0015369	0	1	1	8.1578	1.64903e-14	2.00818e-13	calcium:proton antiporter activity
GO:0044703	1.90271	0.100344	1	1.38716	1.724e-14	2.09733e-13	multi-organism reproductive process
GO:0016324	0	1	1	2.52776	2.10254e-14	2.55523e-13	apical plasma membrane
GO:0032870	0.999554	0.544961	1	1.22088	2.14412e-14	2.60311e-13	cellular response to hormone stimulus
GO:0043630	0	1	1	5.90902	2.5017e-14	3.03414e-13	ncRNA polyadenylation involved in polyadenylation-dependent ncRNA catabolic process
GO:0072511	1.08266	0.551212	1	1.5145	2.66779e-14	3.23229e-13	divalent inorganic cation transport
GO:0036157	0	1	1	inf	2.69514e-14	3.24561e-13	outer dynein arm
GO:0045799	0	1	1	inf	2.69514e-14	3.24561e-13	positive regulation of chromatin assembly or disassembly
GO:1900051	0	1	1	inf	2.69514e-14	3.24561e-13	positive regulation of histone exchange
GO:1903099	0	1	1	inf	2.69514e-14	3.24561e-13	positive regulation of CENP-A containing nucleosome assembly
GO:1903097	0	1	1	inf	2.69514e-14	3.24561e-13	regulation of CENP-A containing nucleosome assembly
GO:0001534	0	1	1	inf	2.69514e-14	3.24561e-13	radial spoke
GO:0004857	2.89839	0.0313378	1	1.53375	2.72941e-14	3.28356e-13	enzyme inhibitor activity
GO:0016638	0	1	1	2.52788	2.79657e-14	3.36097e-13	oxidoreductase activity, acting on the CH-NH2 group of donors
GO:0010053	0	1	1	1.44653	2.89371e-14	3.4742e-13	root epidermal cell differentiation
GO:0045321	0	1	1	2.34364	3.25897e-14	3.90879e-13	leukocyte activation
GO:0051814	0	1	1	4.02454	3.94448e-14	4.70729e-13	movement in other organism involved in symbiotic interaction
GO:0046739	0	1	1	4.02454	3.94448e-14	4.70729e-13	transport of virus in multicellular host
GO:0044000	0	1	1	4.02454	3.94448e-14	4.70729e-13	movement in host
GO:0052192	0	1	1	4.02454	3.94448e-14	4.70729e-13	movement in environment of other organism involved in symbiotic interaction
GO:0052126	0	1	1	4.02454	3.94448e-14	4.70729e-13	movement in host environment
GO:0036503	0	1	1	1.84584	4.22103e-14	5.03227e-13	ERAD pathway
GO:0001228	0	1	1	1.78732	4.5928e-14	5.47002e-13	DNA-binding transcription activator activity, RNA polymerase II-specific
GO:0000027	0	1	1	2.02255	5.60158e-14	6.66481e-13	ribosomal large subunit assembly
GO:0035264	0	1	1	4.57333	5.68605e-14	6.75857e-13	multicellular organism growth
GO:0016925	0	1	1	2.5482	5.9012e-14	7.0073e-13	protein sumoylation
GO:0042113	0	1	1	5.03066	6.38834e-14	7.57821e-13	B cell activation
GO:0016116	3.36768	0.120136	1	1.96125	7.66309e-14	9.07231e-13	carotenoid metabolic process
GO:0016108	3.36768	0.120136	1	1.96125	7.66309e-14	9.07231e-13	tetraterpenoid metabolic process
GO:0055080	0.626385	0.827863	1	1.37397	7.78874e-14	9.21191e-13	cation homeostasis
GO:0015077	0	1	1	1.43089	8.21556e-14	9.70708e-13	monovalent inorganic cation transmembrane transporter activity
GO:0009092	0	1	1	3.73902	8.56886e-14	1.01145e-12	homoserine metabolic process
GO:0071030	0	1	1	4.97005	8.70632e-14	1.02564e-12	nuclear mRNA surveillance of spliceosomal pre-mRNA splicing
GO:0071048	0	1	1	4.97005	8.70632e-14	1.02564e-12	nuclear retention of unspliced pre-mRNA at the site of transcription
GO:0001775	0	1	1	2.30204	9.10948e-14	1.07207e-12	cell activation
GO:0008275	0	1	1	4.70258	9.65103e-14	1.13469e-12	gamma-tubulin small complex
GO:0010942	0	1	1	1.75248	9.75878e-14	1.14622e-12	positive regulation of cell death
GO:0050727	0	1	1	5.55624	1.04014e-13	1.2205e-12	regulation of inflammatory response
GO:0042044	0	1	1	1.80158	1.08681e-13	1.27275e-12	fluid transport
GO:0006833	0	1	1	1.80158	1.08681e-13	1.27275e-12	water transport
GO:2000082	0	1	1	7.36191	1.0988e-13	1.28553e-12	regulation of L-ascorbic acid biosynthetic process
GO:0019953	2.05669	0.0759702	1	1.38919	1.18786e-13	1.38836e-12	sexual reproduction
GO:0019048	0	1	1	3.87548	1.29481e-13	1.51188e-12	modulation by virus of host morphology or physiology
GO:0009871	0	1	1	5.31013	1.42931e-13	1.6673e-12	jasmonic acid and ethylene-dependent systemic resistance, ethylene mediated signaling pathway
GO:0030718	0	1	1	4.51733	1.50065e-13	1.74881e-12	germ-line stem cell population maintenance
GO:0042995	0	1	1	1.43905	1.53247e-13	1.78239e-12	cell projection
GO:0120025	0	1	1	1.43905	1.53247e-13	1.78239e-12	plasma membrane bounded cell projection
GO:0034453	0	1	1	4.85311	1.59821e-13	1.85704e-12	microtubule anchoring
GO:0009664	1.77577	0.191286	1	1.44496	1.66955e-13	1.93804e-12	plant-type cell wall organization
GO:0006813	0	1	1	1.63796	1.67549e-13	1.94305e-12	potassium ion transport
GO:0006814	0	1	1	2.25714	1.75402e-13	2.03016e-12	sodium ion transport
GO:2001021	0	1	1	5.09599	1.87669e-13	2.17003e-12	negative regulation of response to DNA damage stimulus
GO:0007422	0	1	1	5.23739	1.98294e-13	2.29067e-12	peripheral nervous system development
GO:0140142	0	1	1	2.94973	2.03357e-13	2.34688e-12	nucleocytoplasmic carrier activity
GO:0005245	0	1	1	15.4788	2.3693e-13	2.73169e-12	voltage-gated calcium channel activity
GO:0009608	2.35904	0.345825	1	2.14778	2.39489e-13	2.75852e-12	response to symbiont
GO:0016702	0	1	1	2.16946	2.44641e-13	2.81515e-12	oxidoreductase activity, acting on single donors with incorporation of molecular oxygen, incorporation of two atoms of oxygen
GO:0009934	0	1	1	2.47706	2.45295e-13	2.81994e-12	regulation of meristem structural organization
GO:0042255	0	1	1	1.64094	2.47143e-13	2.83845e-12	ribosome assembly
GO:0002239	0	1	1	1.81782	2.54046e-13	2.91492e-12	response to oomycetes
GO:0007623	1.08098	0.552047	1	1.49118	2.64365e-13	3.02749e-12	circadian rhythm
GO:0048511	1.08098	0.552047	1	1.49118	2.64365e-13	3.02749e-12	rhythmic process
GO:0000028	0	1	1	2.19816	2.65101e-13	3.033e-12	ribosomal small subunit assembly
GO:0007507	0	1	1	2.82748	2.79364e-13	3.19311e-12	heart development
GO:0044291	0	1	1	4.312	2.90792e-13	3.32054e-12	cell-cell contact zone
GO:0036159	0	1	1	5.67976	2.93244e-13	3.34534e-12	inner dynein arm assembly
GO:0050268	0	1	1	inf	2.98115e-13	3.39117e-12	coniferyl-alcohol dehydrogenase activity
GO:0052736	0	1	1	inf	2.98115e-13	3.39117e-12	beta-glucanase activity
GO:0033946	0	1	1	inf	2.98115e-13	3.39117e-12	xyloglucan-specific endo-beta-1,4-glucanase activity
GO:0090501	0.967963	0.611705	1	1.45982	3.42697e-13	3.89458e-12	RNA phosphodiester bond hydrolysis
GO:0035649	0	1	1	130.796	3.45644e-13	3.90571e-12	Nrd1 complex
GO:1990248	0	1	1	130.796	3.45644e-13	3.90571e-12	regulation of transcription from RNA polymerase II promoter in response to DNA damage
GO:0033677	0	1	1	130.796	3.45644e-13	3.90571e-12	DNA/RNA helicase activity
GO:0033678	0	1	1	130.796	3.45644e-13	3.90571e-12	5'-3' DNA/RNA helicase activity
GO:0033682	0	1	1	130.796	3.45644e-13	3.90571e-12
GO:0033680	0	1	1	130.796	3.45644e-13	3.90571e-12
GO:0004128	0	1	1	6.31297	3.60229e-13	4.06666e-12	cytochrome-b5 reductase activity, acting on NAD(P)H
GO:0006278	0	1	1	2.39223	3.7453e-13	4.2241e-12	RNA-dependent DNA biosynthetic process
GO:0043813	0	1	1	6.85996	4.09204e-13	4.61081e-12	phosphatidylinositol-3,5-bisphosphate 5-phosphatase activity
GO:0030315	0	1	1	4.16956	4.1173e-13	4.63488e-12	T-tubule
GO:0035197	0	1	1	4.07657	4.40926e-13	4.95886e-12	siRNA binding
GO:0050871	0	1	1	4.54382	4.52954e-13	5.04647e-12	positive regulation of B cell activation
GO:0045830	0	1	1	4.54382	4.52954e-13	5.04647e-12	positive regulation of isotype switching
GO:0002891	0	1	1	4.54382	4.52954e-13	5.04647e-12	positive regulation of immunoglobulin mediated immune response
GO:0002824	0	1	1	4.54382	4.52954e-13	5.04647e-12	positive regulation of adaptive immune response based on somatic recombination of immune receptors built from immunoglobulin superfamily domains
GO:0002708	0	1	1	4.54382	4.52954e-13	5.04647e-12	positive regulation of lymphocyte mediated immunity
GO:0002714	0	1	1	4.54382	4.52954e-13	5.04647e-12	positive regulation of B cell mediated immunity
GO:0002821	0	1	1	4.54382	4.52954e-13	5.04647e-12	positive regulation of adaptive immune response
GO:0002705	0	1	1	4.54382	4.52954e-13	5.04647e-12	positive regulation of leukocyte mediated immunity
GO:0002702	0	1	1	4.54382	4.52954e-13	5.04647e-12	positive regulation of production of molecular mediator of immune response
GO:0002639	0	1	1	4.54382	4.52954e-13	5.04647e-12	positive regulation of immunoglobulin production
GO:0006026	0	1	1	3.91274	4.83102e-13	5.37733e-12	aminoglycan catabolic process
GO:0018024	0	1	1	2.35674	4.86224e-13	5.40703e-12	histone-lysine N-methyltransferase activity
GO:0006293	0	1	1	8.43848	5.30479e-13	5.89366e-12	nucleotide-excision repair, preincision complex stabilization
GO:0042023	0	1	1	2.0903	5.63909e-13	6.25923e-12	DNA endoreduplication
GO:0001727	0	1	1	5.50227	5.87648e-13	6.51665e-12	lipid kinase activity
GO:0009887	0	1	1	2.15852	6.20344e-13	6.87284e-12	animal organ morphogenesis
GO:1905392	0.671818	0.863624	1	1.22852	6.71131e-13	7.42859e-12	plant organ morphogenesis
GO:0008017	0	1	1	1.5418	6.76986e-13	7.48645e-12	microtubule binding
GO:0000304	0	1	1	2.9039	7.9589e-13	8.79318e-12	response to singlet oxygen
GO:0051168	0	1	1	1.53544	8.53454e-13	9.42042e-12	nuclear export
GO:0051321	1.42069	0.311714	1	1.38078	8.94787e-13	9.86751e-12	meiotic cell cycle
GO:0071265	0	1	1	3.52801	9.25204e-13	1.01935e-11	L-methionine biosynthetic process
GO:0010324	0	1	1	3.13795	9.32358e-13	1.02628e-11	membrane invagination
GO:1901700	0.856443	0.792648	1	1.11935	9.86604e-13	1.08499e-11	response to oxygen-containing compound
GO:1900150	0	1	1	1.84326	1.17394e-12	1.28982e-11	regulation of defense response to fungus
GO:0042800	0	1	1	4.57332	1.36711e-12	1.50067e-11	histone methyltransferase activity (H3-K4 specific)
GO:0030149	0	1	1	4.24154	1.4896e-12	1.63362e-11	sphingolipid catabolic process
GO:0048018	0	1	1	5.1015	1.51606e-12	1.65959e-11	receptor ligand activity
GO:0030545	0	1	1	5.1015	1.51606e-12	1.65959e-11	receptor regulator activity
GO:0046320	0	1	1	5.6275	1.66711e-12	1.81992e-11	regulation of fatty acid oxidation
GO:0035690	0	1	1	1.51756	1.74892e-12	1.90748e-11	cellular response to drug
GO:0061806	0	1	1	6.6313	1.84485e-12	2.00293e-11	regulation of DNA recombination at centromere
GO:0030702	0	1	1	6.6313	1.84485e-12	2.00293e-11	chromatin silencing at centromere
GO:0030491	0	1	1	6.6313	1.84485e-12	2.00293e-11	heteroduplex formation
GO:0033170	0	1	1	6.6313	1.84485e-12	2.00293e-11	protein-DNA loading ATPase activity
GO:0015616	0	1	1	6.6313	1.84485e-12	2.00293e-11	DNA translocase activity
GO:0016157	0	1	1	3.67202	1.89988e-12	2.0608e-11	sucrose synthase activity
GO:0043900	0	1	1	1.37178	1.90714e-12	2.0668e-11	regulation of multi-organism process
GO:0021537	0	1	1	4.89827	1.91133e-12	2.06945e-11	telencephalon development
GO:0015986	0	1	1	2.4016	1.91613e-12	2.07088e-11	ATP synthesis coupled proton transport
GO:0015985	0	1	1	2.4016	1.91613e-12	2.07088e-11	energy coupled proton transport, down electrochemical gradient
GO:0071495	0.934966	0.623571	1	1.19522	2.00807e-12	2.16827e-11	cellular response to endogenous stimulus
GO:0005816	0	1	1	4.26844	2.28282e-12	2.46272e-11	spindle pole body
GO:0022843	0	1	1	2.13212	2.33561e-12	2.51738e-11	voltage-gated cation channel activity
GO:0046820	0	1	1	5.74931	2.34128e-12	2.52122e-11	4-amino-4-deoxychorismate synthase activity
GO:0000393	0	1	1	3.64541	2.36039e-12	2.5395e-11	spliceosomal conformational changes to generate catalytic conformation
GO:0016872	0	1	1	2.77163	2.50316e-12	2.69067e-11	intramolecular lyase activity
GO:0042545	2.36997	0.135304	1	1.57676	2.57004e-12	2.76007e-11	cell wall modification
GO:0007127	2.97907	0.0476072	1	1.55788	2.58824e-12	2.77711e-11	meiosis I
GO:0035082	0	1	1	2.53024	2.70248e-12	2.89708e-11	axoneme assembly
GO:0045214	0	1	1	6.48393	2.77004e-12	2.95885e-11	sarcomere organization
GO:0008307	0	1	1	6.48393	2.77004e-12	2.95885e-11	structural constituent of muscle
GO:0031032	0	1	1	6.48393	2.77004e-12	2.95885e-11	actomyosin structure organization
GO:0030239	0	1	1	6.48393	2.77004e-12	2.95885e-11	myofibril assembly
GO:0015665	0	1	1	3.00901	2.84799e-12	3.03939e-11	alcohol transmembrane transporter activity
GO:0042581	0	1	1	8.62394	2.99951e-12	3.19822e-11	specific granule
GO:0045273	0	1	1	2.93828	3.18715e-12	3.39525e-11	respiratory chain complex II
GO:0043190	0	1	1	inf	3.29751e-12	3.41805e-11	ATP-binding cassette (ABC) transporter complex
GO:0036371	0	1	1	inf	3.29751e-12	3.41805e-11	protein localization to T-tubule
GO:0036309	0	1	1	inf	3.29751e-12	3.41805e-11	protein localization to M-band
GO:0035735	0	1	1	inf	3.29751e-12	3.41805e-11	intraciliary transport involved in cilium assembly
GO:1901018	0	1	1	inf	3.29751e-12	3.41805e-11	positive regulation of potassium ion transmembrane transporter activity
GO:1901021	0	1	1	inf	3.29751e-12	3.41805e-11	positive regulation of calcium ion transmembrane transporter activity
GO:0098907	0	1	1	inf	3.29751e-12	3.41805e-11	regulation of SA node cell action potential
GO:0098910	0	1	1	inf	3.29751e-12	3.41805e-11	regulation of atrial cardiac muscle cell action potential
GO:0099623	0	1	1	inf	3.29751e-12	3.41805e-11	regulation of cardiac muscle cell membrane repolarization
GO:1903779	0	1	1	inf	3.29751e-12	3.41805e-11	regulation of cardiac conduction
GO:1903115	0	1	1	inf	3.29751e-12	3.41805e-11	regulation of actin filament-based movement
GO:0070296	0	1	1	inf	3.29751e-12	3.41805e-11	sarcoplasmic reticulum calcium ion transport
GO:0060307	0	1	1	inf	3.29751e-12	3.41805e-11	regulation of ventricular cardiac muscle cell membrane repolarization
GO:0060306	0	1	1	inf	3.29751e-12	3.41805e-11	regulation of membrane repolarization
GO:0086066	0	1	1	inf	3.29751e-12	3.41805e-11	atrial cardiac muscle cell to AV node cell communication
GO:0086070	0	1	1	inf	3.29751e-12	3.41805e-11	SA node cell to atrial cardiac muscle cell communication
GO:0086091	0	1	1	inf	3.29751e-12	3.41805e-11	regulation of heart rate by cardiac conduction
GO:0086046	0	1	1	inf	3.29751e-12	3.41805e-11	membrane depolarization during SA node cell action potential
GO:0086019	0	1	1	inf	3.29751e-12	3.41805e-11	cell-cell signaling involved in cardiac conduction
GO:0086026	0	1	1	inf	3.29751e-12	3.41805e-11	atrial cardiac muscle cell to AV node cell signaling
GO:0086001	0	1	1	inf	3.29751e-12	3.41805e-11	cardiac muscle cell action potential
GO:0086003	0	1	1	inf	3.29751e-12	3.41805e-11	cardiac muscle cell contraction
GO:0086004	0	1	1	inf	3.29751e-12	3.41805e-11	regulation of cardiac muscle cell contraction
GO:0086005	0	1	1	inf	3.29751e-12	3.41805e-11	ventricular cardiac muscle cell action potential
GO:0086012	0	1	1	inf	3.29751e-12	3.41805e-11	membrane depolarization during cardiac muscle cell action potential
GO:0086014	0	1	1	inf	3.29751e-12	3.41805e-11	atrial cardiac muscle cell action potential
GO:0086015	0	1	1	inf	3.29751e-12	3.41805e-11	SA node cell action potential
GO:0086018	0	1	1	inf	3.29751e-12	3.41805e-11	SA node cell to atrial cardiac muscle cell signaling
GO:0086002	0	1	1	inf	3.29751e-12	3.41805e-11	cardiac muscle cell action potential involved in contraction
GO:0002027	0	1	1	inf	3.29751e-12	3.41805e-11	regulation of heart rate
GO:0033292	0	1	1	inf	3.29751e-12	3.41805e-11	T-tubule organization
GO:0090030	0	1	1	13.6545	3.43444e-12	3.55379e-11	regulation of steroid hormone biosynthetic process
GO:0010422	0	1	1	13.6545	3.43444e-12	3.55379e-11	regulation of brassinosteroid biosynthetic process
GO:0042555	0	1	1	3.46483	4.18381e-12	4.32545e-11	MCM complex
GO:1900864	2.96102	0.147567	1	1.81471	4.19543e-12	4.3337e-11	mitochondrial RNA modification
GO:0002229	0	1	1	1.85752	4.25741e-12	4.39392e-11	defense response to oomycetes
GO:0000930	0	1	1	3.51458	4.3444e-12	4.47981e-11	gamma-tubulin complex
GO:0002028	0	1	1	5.18309	4.44422e-12	4.57878e-11	regulation of sodium ion transport
GO:0036003	0	1	1	4.71225	4.65497e-12	4.79176e-11	positive regulation of transcription from RNA polymerase II promoter in response to stress
GO:1990726	0	1	1	5.55105	4.72692e-12	4.86162e-11	Lsm1-7-Pat1 complex
GO:0000172	0	1	1	4.45899	4.75694e-12	4.88827e-11	ribonuclease MRP complex
GO:0072089	0	1	1	4.14289	4.91949e-12	5.05096e-11	stem cell proliferation
GO:0006644	0	1	1	1.36107	5.10157e-12	5.23339e-11	phospholipid metabolic process
GO:0071732	0	1	1	2.20413	6.08551e-12	6.23203e-11	cellular response to nitric oxide
GO:0000380	0	1	1	4.65335	6.21248e-12	6.35659e-11	alternative mRNA splicing, via spliceosome
GO:0032527	0	1	1	3.41954	6.25664e-12	6.39627e-11	protein exit from endoplasmic reticulum
GO:0044456	0	1	1	2.24066	6.44189e-12	6.58001e-11	synapse part
GO:0043175	0	1	1	2.4789	6.67083e-12	6.80219e-11	RNA polymerase core enzyme binding
GO:0000993	0	1	1	2.4789	6.67083e-12	6.80219e-11	RNA polymerase II complex binding
GO:0005761	0	1	1	2.19967	6.75639e-12	6.88354e-11	mitochondrial ribosome
GO:0010605	1.23325	0.252569	1	1.17419	7.26907e-12	7.39954e-11	negative regulation of macromolecule metabolic process
GO:0009815	0	1	1	5.03064	8.37172e-12	8.5147e-11	1-aminocyclopropane-1-carboxylate oxidase activity
GO:0046466	0	1	1	3.88332	8.78465e-12	8.92707e-11	membrane lipid catabolic process
GO:0007155	0	1	1	2.49283	9.16166e-12	9.29432e-11	cell adhesion
GO:0022610	0	1	1	2.49283	9.16166e-12	9.29432e-11	biological adhesion
GO:0007018	2.67781	0.0650137	1	1.51037	9.36599e-12	9.49353e-11	microtubule-based movement
GO:0009631	0	1	1	1.84053	1.21525e-11	1.23075e-10	cold acclimation
GO:0060537	0	1	1	5.69506	1.33776e-11	1.34566e-10	muscle tissue development
GO:0007517	0	1	1	5.69506	1.33776e-11	1.34566e-10	muscle organ development
GO:0001756	0	1	1	5.69506	1.33776e-11	1.34566e-10	somitogenesis
GO:0002262	0	1	1	5.69506	1.33776e-11	1.34566e-10	myeloid cell homeostasis
GO:0030099	0	1	1	5.69506	1.33776e-11	1.34566e-10	myeloid cell differentiation
GO:0030218	0	1	1	5.69506	1.33776e-11	1.34566e-10	erythrocyte differentiation
GO:0034101	0	1	1	5.69506	1.33776e-11	1.34566e-10	erythrocyte homeostasis
GO:0014706	0	1	1	5.69506	1.33776e-11	1.34566e-10	striated muscle tissue development
GO:0001654	0	1	1	3.67318	1.40099e-11	1.40808e-10	eye development
GO:0080156	0	1	1	1.89202	1.53165e-11	1.5381e-10	mitochondrial mRNA modification
GO:0006195	0	1	1	5.03064	1.68248e-11	1.68815e-10	purine nucleotide catabolic process
GO:0050525	0	1	1	17.8866	1.82949e-11	1.83411e-10	cutinase activity
GO:0050486	0	1	1	5.37758	1.87107e-11	1.87422e-10	intramolecular transferase activity, transferring hydroxy groups
GO:0010088	0	1	1	2.3104	1.96068e-11	1.96233e-10	phloem development
GO:0005179	0	1	1	4.81808	2.08798e-11	2.08798e-10	hormone activity
GO:0045840	0	1	1	3.42365	2.39737e-11	2.39535e-10	positive regulation of mitotic nuclear division
GO:0016042	0	1	1	1.46095	2.44263e-11	2.43709e-10	lipid catabolic process
GO:0033095	0	1	1	3.02362	2.44323e-11	2.43709e-10	aleurone grain
GO:0009609	14.3886	0.0676613	1	4.37962	2.48468e-11	2.47016e-10	response to symbiotic bacterium
GO:0048749	0	1	1	4.37962	2.48468e-11	2.47016e-10	compound eye development
GO:0060581	0	1	1	4.37962	2.48468e-11	2.47016e-10	cell fate commitment involved in pattern specification
GO:0008593	0	1	1	4.37962	2.48468e-11	2.47016e-10	regulation of Notch signaling pathway
GO:0032453	0	1	1	3.52897	2.59867e-11	2.58134e-10	histone demethylase activity (H3-K4 specific)
GO:0009624	0	1	1	1.47594	2.69968e-11	2.67944e-10	response to nematode
GO:0045727	0	1	1	1.96467	3.22246e-11	3.19563e-10	positive regulation of translation
GO:0004000	0	1	1	4.3287	3.24306e-11	3.21338e-10	adenosine deaminase activity
GO:0005682	0	1	1	2.532	3.55969e-11	3.52418e-10	U5 snRNP
GO:0005815	0	1	1	1.6878	3.58755e-11	3.53179e-10	microtubule organizing center
GO:0048265	0	1	1	inf	3.64744e-11	3.53179e-10	response to pain
GO:0051969	0	1	1	inf	3.64744e-11	3.53179e-10	regulation of transmission of nerve impulse
GO:0051931	0	1	1	inf	3.64744e-11	3.53179e-10	regulation of sensory perception
GO:0051930	0	1	1	inf	3.64744e-11	3.53179e-10	regulation of sensory perception of pain
GO:0050906	0	1	1	inf	3.64744e-11	3.53179e-10	detection of stimulus involved in sensory perception
GO:0050907	0	1	1	inf	3.64744e-11	3.53179e-10	detection of chemical stimulus involved in sensory perception
GO:0050955	0	1	1	inf	3.64744e-11	3.53179e-10	thermoception
GO:0050966	0	1	1	inf	3.64744e-11	3.53179e-10	detection of mechanical stimulus involved in sensory perception of pain
GO:0050968	0	1	1	inf	3.64744e-11	3.53179e-10	detection of chemical stimulus involved in sensory perception of pain
GO:0050974	0	1	1	inf	3.64744e-11	3.53179e-10	detection of mechanical stimulus involved in sensory perception
GO:0050951	0	1	1	inf	3.64744e-11	3.53179e-10	sensory perception of temperature stimulus
GO:0098908	0	1	1	inf	3.64744e-11	3.53179e-10	regulation of neuronal action potential
GO:0097604	0	1	1	inf	3.64744e-11	3.53179e-10	temperature-gated cation channel activity
GO:0097603	0	1	1	inf	3.64744e-11	3.53179e-10	temperature-gated ion channel activity
GO:0099604	0	1	1	inf	3.64744e-11	3.53179e-10	ligand-gated calcium channel activity
GO:1990760	0	1	1	inf	3.64744e-11	3.53179e-10	osmolarity-sensing cation channel activity
GO:1904058	0	1	1	inf	3.64744e-11	3.53179e-10	positive regulation of sensory perception of pain
GO:0006939	0	1	1	inf	3.64744e-11	3.53179e-10	smooth muscle contraction
GO:0007606	0	1	1	inf	3.64744e-11	3.53179e-10	sensory perception of chemical stimulus
GO:0031646	0	1	1	inf	3.64744e-11	3.53179e-10	positive regulation of nervous system process
GO:0030275	0	1	1	inf	3.64744e-11	3.53179e-10	LRR domain binding
GO:0032421	0	1	1	inf	3.64744e-11	3.53179e-10	stereocilium bundle
GO:0033555	0	1	1	inf	3.64744e-11	3.53179e-10	multicellular organismal response to stress
GO:0014848	0	1	1	inf	3.64744e-11	3.53179e-10	urinary tract smooth muscle contraction
GO:0014832	0	1	1	inf	3.64744e-11	3.53179e-10	urinary bladder smooth muscle contraction
GO:0015278	0	1	1	inf	3.64744e-11	3.53179e-10	calcium-release channel activity
GO:0080140	0	1	1	5.38997	3.75952e-11	3.6344e-10	regulation of jasmonic acid metabolic process
GO:0080141	0	1	1	5.38997	3.75952e-11	3.6344e-10	regulation of jasmonic acid biosynthetic process
GO:0000266	0	1	1	2.26262	4.03415e-11	3.89673e-10	mitochondrial fission
GO:0003962	0	1	1	3.53298	4.06562e-11	3.92395e-10	cystathionine gamma-synthase activity
GO:0070042	0	1	1	7.71363	4.07147e-11	3.92642e-10	rRNA (uridine-N3-)-methyltransferase activity
GO:0044463	0	1	1	1.56387	4.87662e-11	4.69527e-10	cell projection part
GO:0120038	0	1	1	1.56387	4.87662e-11	4.69527e-10	plasma membrane bounded cell projection part
GO:0046873	0.673015	0.796587	1	1.33704	5.16873e-11	4.9725e-10	metal ion transmembrane transporter activity
GO:0036156	0	1	1	8.80359	5.231e-11	5.02835e-10	inner dynein arm
GO:0070647	1.04185	0.501469	1	1.20358	5.63173e-11	5.40919e-10	protein modification by small protein conjugation or removal
GO:0016926	0	1	1	3.42668	5.87575e-11	5.63902e-10	protein desumoylation
GO:0070071	0	1	1	2.9099	5.89979e-11	5.65753e-10	proton-transporting two-sector ATPase complex assembly
GO:0062013	0	1	1	1.98373	6.12964e-11	5.87321e-10	positive regulation of small molecule metabolic process
GO:0000381	0	1	1	2.04429	7.30895e-11	6.99755e-10	regulation of alternative mRNA splicing, via spliceosome
GO:0050801	0.489757	0.914328	1	1.28109	8.38191e-11	8.01836e-10	ion homeostasis
GO:0034720	0	1	1	3.37773	8.73836e-11	8.35264e-10	histone H3-K4 demethylation
GO:0048793	0	1	1	10.0612	9.48036e-11	9.04012e-10	pronephros development
GO:1900152	0	1	1	10.0612	9.48036e-11	9.04012e-10	negative regulation of nuclear-transcribed mRNA catabolic process, deadenylation-dependent decay
GO:0060212	0	1	1	10.0612	9.48036e-11	9.04012e-10	negative regulation of nuclear-transcribed mRNA poly(A) tail shortening
GO:0090057	0	1	1	4.02452	9.65329e-11	9.19765e-10	root radial pattern formation
GO:0036209	0	1	1	4.34747	9.89217e-11	9.41773e-10	9beta-pimara-7,15-diene oxidase activity
GO:0031011	0	1	1	3.6053	1.02139e-10	9.70848e-10	Ino80 complex
GO:0033202	0	1	1	3.6053	1.02139e-10	9.70848e-10	DNA helicase complex
GO:0009539	0	1	1	40.2448	1.04454e-10	9.92065e-10	photosystem II reaction center
GO:0045259	0	1	1	2.49846	1.06343e-10	1.0092e-09	proton-transporting ATP synthase complex
GO:0045596	0	1	1	1.87655	1.12396e-10	1.06579e-09	negative regulation of cell differentiation
GO:0048583	0.637886	0.949201	1	1.13821	1.14878e-10	1.08846e-09	regulation of response to stimulus
GO:0099402	0.944845	0.622547	1	1.1327	1.18191e-10	1.11808e-09	plant organ development
GO:0070887	0.836293	0.781401	1	1.13343	1.20862e-10	1.14243e-09	cellular response to chemical stimulus
GO:0010033	0.886839	0.757928	1	1.0982	1.22454e-10	1.15656e-09	response to organic substance
GO:0009445	0	1	1	3.57551	1.26302e-10	1.19102e-09	putrescine metabolic process
GO:0009446	0	1	1	3.57551	1.26302e-10	1.19102e-09	putrescine biosynthetic process
GO:0042692	0	1	1	3.79672	1.29472e-10	1.21898e-09	muscle cell differentiation
GO:0055001	0	1	1	3.79672	1.29472e-10	1.21898e-09	muscle cell development
GO:0031256	0	1	1	5.03064	1.36945e-10	1.28832e-09	leading edge membrane
GO:0002698	0	1	1	4.16329	1.40307e-10	1.31891e-09	negative regulation of immune effector process
GO:0010073	0.853354	0.679153	1	1.37258	1.49947e-10	1.40842e-09	meristem maintenance
GO:0051231	0	1	1	5.41761	1.51974e-10	1.42632e-09	spindle elongation
GO:0006491	0	1	1	2.57124	1.55877e-10	1.46181e-09	N-glycan processing
GO:0071695	0	1	1	1.32653	1.64603e-10	1.54242e-09	anatomical structure maturation
GO:0017022	0	1	1	2.07033	1.73814e-10	1.62746e-09	myosin binding
GO:0000329	0	1	1	3.2839	1.89225e-10	1.77036e-09	fungal-type vacuole membrane
GO:0033554	0.623827	0.957239	1	1.13491	1.90005e-10	1.77626e-09	cellular response to stress
GO:1903046	1.51201	0.27413	1	1.3462	2.02182e-10	1.88862e-09	meiotic cell cycle process
GO:0032446	1.15263	0.392622	1	1.20688	2.39101e-10	2.23173e-09	protein modification by small protein conjugation
GO:0015513	0	1	1	6.80614	2.41876e-10	2.25587e-09	high-affinity secondary active nitrite transmembrane transporter activity
GO:1903707	0	1	1	3.9603	2.42538e-10	2.26028e-09	negative regulation of hemopoiesis
GO:0002252	0	1	1	1.4534	2.50374e-10	2.33147e-09	immune effector process
GO:0003954	0	1	1	2.214	2.64158e-10	2.4579e-09	NADH dehydrogenase activity
GO:0048513	0	1	1	1.50219	2.69791e-10	2.50836e-09	animal organ development
GO:0002230	0	1	1	3.40537	2.75731e-10	2.56158e-09	positive regulation of defense response to virus by host
GO:0042565	0	1	1	5.21695	2.94204e-10	2.72895e-09	RNA nuclear export complex
GO:0061716	0	1	1	5.21695	2.94204e-10	2.72895e-09	miRNA export from nucleus
GO:1901618	0	1	1	2.19565	3.03941e-10	2.81708e-09	organic hydroxy compound transmembrane transporter activity
GO:0006521	0	1	1	2.0087	3.07418e-10	2.83969e-09	regulation of cellular amino acid metabolic process
GO:0033238	0	1	1	2.0087	3.07418e-10	2.83969e-09	regulation of cellular amine metabolic process
GO:0070140	0	1	1	3.91861	3.07573e-10	2.83969e-09	SUMO-specific isopeptidase activity
GO:0070138	0	1	1	3.91861	3.07573e-10	2.83969e-09	ubiquitin-like protein-specific isopeptidase activity
GO:0070122	0	1	1	3.91861	3.07573e-10	2.83969e-09	isopeptidase activity
GO:0016514	0	1	1	2.82511	3.12549e-10	2.88339e-09	SWI/SNF complex
GO:0019184	0	1	1	3.73705	3.16948e-10	2.92171e-09	nonribosomal peptide biosynthetic process
GO:0061982	2.85218	0.0541402	1	1.48188	3.33736e-10	3.07409e-09	meiosis I cell cycle process
GO:0099086	0	1	1	2.35672	3.49774e-10	3.21684e-09	synaptonemal structure
GO:0000795	0	1	1	2.35672	3.49774e-10	3.21684e-09	synaptonemal complex
GO:0006672	0	1	1	2.28168	3.7311e-10	3.42881e-09	ceramide metabolic process
GO:0035885	0	1	1	inf	4.03451e-10	3.69908e-09	exochitinase activity
GO:1901611	0	1	1	inf	4.03451e-10	3.69908e-09	phosphatidylglycerol binding
GO:0003996	0	1	1	inf	4.03451e-10	3.69908e-09	acyl-CoA ligase activity
GO:0022603	1.42011	0.31197	1	1.32735	4.60897e-10	4.22253e-09	regulation of anatomical structure morphogenesis
GO:0044614	0	1	1	3.52575	4.70807e-10	4.31e-09	nuclear pore cytoplasmic filaments
GO:0043005	0	1	1	1.93244	4.82287e-10	4.4117e-09	neuron projection
GO:0071218	0	1	1	2.21605	4.9588e-10	4.53256e-09	cellular response to misfolded protein
GO:0000098	0	1	1	3.32855	4.9636e-10	4.53347e-09	sulfur amino acid catabolic process
GO:0006687	0	1	1	3.06214	5.66851e-10	5.17333e-09	glycosphingolipid metabolic process
GO:0045995	0	1	1	2.01229	5.73799e-10	5.23273e-09	regulation of embryonic development
GO:0042436	0	1	1	2.6085	5.80562e-10	5.29036e-09	indole-containing compound catabolic process
GO:0045199	0	1	1	3.89469	6.05394e-10	5.49561e-09	maintenance of epithelial cell apical/basal polarity
GO:0045197	0	1	1	3.89469	6.05394e-10	5.49561e-09	establishment or maintenance of epithelial cell apical/basal polarity
GO:0061245	0	1	1	3.89469	6.05394e-10	5.49561e-09	establishment or maintenance of bipolar cell polarity
GO:0035090	0	1	1	3.89469	6.05394e-10	5.49561e-09	maintenance of apical/basal cell polarity
GO:0035088	0	1	1	3.89469	6.05394e-10	5.49561e-09	establishment or maintenance of apical/basal cell polarity
GO:0002064	0	1	1	3.79865	6.16523e-10	5.57963e-09	epithelial cell development
GO:0002065	0	1	1	3.79865	6.16523e-10	5.57963e-09	columnar/cuboidal epithelial cell differentiation
GO:0002066	0	1	1	3.79865	6.16523e-10	5.57963e-09	columnar/cuboidal epithelial cell development
GO:0030707	0	1	1	3.79865	6.16523e-10	5.57963e-09	ovarian follicle cell development
GO:0051262	0	1	1	1.78111	6.22328e-10	5.62789e-09	protein tetramerization
GO:0006511	1.70152	0.0888107	1	1.23235	6.27706e-10	5.67222e-09	ubiquitin-dependent protein catabolic process
GO:0005663	0	1	1	2.42979	6.90435e-10	6.23433e-09	DNA replication factor C complex
GO:0016755	0	1	1	2.99444	7.18315e-10	6.48116e-09	transferase activity, transferring amino-acyl groups
GO:0007204	0	1	1	3.07607	7.44373e-10	6.71119e-09	positive regulation of cytosolic calcium ion concentration
GO:0009909	0.661378	0.804405	1	1.31092	7.56203e-10	6.81269e-09	regulation of flower development
GO:0051753	0	1	1	2.35079	8.23799e-10	7.41046e-09	mannan synthase activity
GO:0019187	0	1	1	2.35079	8.23799e-10	7.41046e-09	beta-1,4-mannosyltransferase activity
GO:0042402	0	1	1	2.57669	8.74389e-10	7.85368e-09	cellular biogenic amine catabolic process
GO:0009310	0	1	1	2.57669	8.74389e-10	7.85368e-09	amine catabolic process
GO:0043632	1.61006	0.113624	1	1.22316	9.42485e-10	8.45256e-09	modification-dependent macromolecule catabolic process
GO:0001701	0	1	1	2.46105	9.92607e-10	8.89537e-09	in utero embryonic development
GO:0051298	0	1	1	3.35377	1.00478e-09	8.99091e-09	centrosome duplication
GO:0007098	0	1	1	3.35377	1.00478e-09	8.99091e-09	centrosome cycle
GO:0016300	0	1	1	4.23633	1.01996e-09	9.11994e-09	tRNA (uracil) methyltransferase activity
GO:0018193	0.979578	0.574271	1	1.21207	1.06366e-09	9.50352e-09	peptidyl-amino acid modification
GO:0044304	0	1	1	4.50505	1.07116e-09	9.55619e-09	main axon
GO:0014731	0	1	1	4.50505	1.07116e-09	9.55619e-09	spectrin-associated cytoskeleton
GO:0019787	1.27931	0.291791	1	1.20928	1.14964e-09	1.02486e-08	ubiquitin-like protein transferase activity
GO:0045177	0	1	1	1.92351	1.15592e-09	1.02969e-08	apical part of cell
GO:0036230	0	1	1	2.32902	1.16749e-09	1.03767e-08	granulocyte activation
GO:0002275	0	1	1	2.32902	1.16749e-09	1.03767e-08	myeloid cell activation involved in immune response
GO:0002274	0	1	1	2.32902	1.16749e-09	1.03767e-08	myeloid leukocyte activation
GO:1902170	0	1	1	1.81264	1.23644e-09	1.09814e-08	cellular response to reactive nitrogen species
GO:0034250	0	1	1	1.83949	1.25852e-09	1.11691e-08	positive regulation of cellular amide metabolic process
GO:0070139	0	1	1	3.20795	1.27467e-09	1.12851e-08	SUMO-specific endopeptidase activity
GO:0070137	0	1	1	3.20795	1.27467e-09	1.12851e-08	ubiquitin-like protein-specific endopeptidase activity
GO:0016929	0	1	1	3.20795	1.27467e-09	1.12851e-08	SUMO-specific protease activity
GO:0022821	0	1	1	2.44347	1.27538e-09	1.12851e-08	potassium ion antiporter activity
GO:0032411	0	1	1	2.96991	1.32318e-09	1.16907e-08	positive regulation of transporter activity
GO:0032414	0	1	1	2.96991	1.32318e-09	1.16907e-08	positive regulation of ion transmembrane transporter activity
GO:0046786	0	1	1	4.77484	1.38033e-09	1.21866e-08	viral replication complex formation and maintenance
GO:0005731	0	1	1	6.81568	1.42043e-09	1.25313e-08	nucleolus organizer region
GO:0098771	0.580713	0.858057	1	1.2847	1.45821e-09	1.28551e-08	inorganic ion homeostasis
GO:0099515	0	1	1	3.57317	1.46884e-09	1.29297e-08	actin filament-based transport
GO:0031022	0	1	1	3.57317	1.46884e-09	1.29297e-08	nuclear migration along microfilament
GO:0016782	5.1742	0.0581859	1	1.95886	1.47923e-09	1.30115e-08	transferase activity, transferring sulfur-containing groups
GO:0009694	0	1	1	1.82441	1.48956e-09	1.30927e-08	jasmonic acid metabolic process
GO:0009056	0.892167	0.708046	1	1.12041	1.50865e-09	1.32508e-08	catabolic process
GO:0015630	1.88542	0.0670953	1	1.2545	1.51235e-09	1.32734e-08	microtubule cytoskeleton
GO:0099094	0	1	1	2.56796	1.77974e-09	1.56044e-08	ligand-gated cation channel activity
GO:0019941	1.68687	0.0923786	1	1.22454	1.78055e-09	1.56044e-08	modification-dependent protein catabolic process
GO:0080135	0.582009	0.820627	1	1.41109	1.78506e-09	1.56324e-08	regulation of cellular response to stress
GO:0008630	0	1	1	2.93455	1.83952e-09	1.60975e-08	intrinsic apoptotic signaling pathway in response to DNA damage
GO:1901038	0	1	1	4.37446	1.84723e-09	1.61531e-08	cyanidin 3-O-glucoside metabolic process
GO:0042537	0	1	1	1.71442	2.07514e-09	1.81327e-08	benzene-containing compound metabolic process
GO:0021700	0	1	1	1.28336	2.14036e-09	1.86889e-08	developmental maturation
GO:0005249	0	1	1	2.00831	2.18791e-09	1.90901e-08	voltage-gated potassium channel activity
GO:0009556	0	1	1	1.88553	2.29867e-09	2.00419e-08	microsporogenesis
GO:0071044	0	1	1	3.30011	2.31898e-09	2.01894e-08	histone mRNA catabolic process
GO:0008334	0	1	1	3.30011	2.31898e-09	2.01894e-08	histone mRNA metabolic process
GO:0000959	2.23641	0.225678	1	1.58356	2.39849e-09	2.08664e-08	mitochondrial RNA metabolic process
GO:0010031	0	1	1	3.54541	2.84165e-09	2.47037e-08	circumnutation
GO:0045664	0	1	1	2.11947	3.11453e-09	2.70365e-08	regulation of neuron differentiation
GO:0034968	0	1	1	1.56673	3.13531e-09	2.71971e-08	histone lysine methylation
GO:0048661	0	1	1	3.86072	3.65199e-09	3.16559e-08	positive regulation of smooth muscle cell proliferation
GO:1900449	0	1	1	90.5508	3.70624e-09	3.18973e-08	regulation of glutamate receptor signaling pathway
GO:1902042	0	1	1	90.5508	3.70624e-09	3.18973e-08	negative regulation of extrinsic apoptotic signaling pathway via death domain receptors
GO:1902041	0	1	1	90.5508	3.70624e-09	3.18973e-08	regulation of extrinsic apoptotic signaling pathway via death domain receptors
GO:0097191	0	1	1	90.5508	3.70624e-09	3.18973e-08	extrinsic apoptotic signaling pathway
GO:0099601	0	1	1	90.5508	3.70624e-09	3.18973e-08	regulation of neurotransmitter receptor activity
GO:2000310	0	1	1	90.5508	3.70624e-09	3.18973e-08	regulation of NMDA receptor activity
GO:0071447	0	1	1	90.5508	3.70624e-09	3.18973e-08	cellular response to hydroperoxide
GO:0008625	0	1	1	90.5508	3.70624e-09	3.18973e-08	extrinsic apoptotic signaling pathway via death domain receptors
GO:1904823	0	1	1	2.40597	3.7093e-09	3.18973e-08	purine nucleobase transmembrane transport
GO:0006863	0	1	1	2.40597	3.7093e-09	3.18973e-08	purine nucleobase transport
GO:0005345	0	1	1	2.40597	3.7093e-09	3.18973e-08	purine nucleobase transmembrane transporter activity
GO:0046794	0	1	1	2.75362	3.75223e-09	3.22432e-08	transport of virus
GO:0044666	0	1	1	3.17725	3.75815e-09	3.22708e-08	MLL3/4 complex
GO:0044786	0	1	1	1.62339	4.01316e-09	3.44357e-08	cell cycle DNA replication
GO:0003735	0.605463	0.841783	1	1.28189	4.23453e-09	3.63091e-08	structural constituent of ribosome
GO:0042406	0	1	1	2.9668	4.24553e-09	3.63771e-08	extrinsic component of endoplasmic reticulum membrane
GO:0048563	0	1	1	3.05308	4.44106e-09	3.75354e-08	post-embryonic animal organ morphogenesis
GO:0048707	0	1	1	3.05308	4.44106e-09	3.75354e-08	instar larval or pupal morphogenesis
GO:0048737	0	1	1	3.05308	4.44106e-09	3.75354e-08	imaginal disc-derived appendage development
GO:0007560	0	1	1	3.05308	4.44106e-09	3.75354e-08	imaginal disc morphogenesis
GO:0007552	0	1	1	3.05308	4.44106e-09	3.75354e-08	metamorphosis
GO:0007472	0	1	1	3.05308	4.44106e-09	3.75354e-08	wing disc morphogenesis
GO:0007476	0	1	1	3.05308	4.44106e-09	3.75354e-08	imaginal disc-derived wing morphogenesis
GO:0035220	0	1	1	3.05308	4.44106e-09	3.75354e-08	wing disc development
GO:0035114	0	1	1	3.05308	4.44106e-09	3.75354e-08	imaginal disc-derived appendage morphogenesis
GO:0035120	0	1	1	3.05308	4.44106e-09	3.75354e-08	post-embryonic appendage morphogenesis
GO:0048593	0	1	1	inf	4.46265e-09	3.75354e-08	camera-type eye morphogenesis
GO:0043010	0	1	1	inf	4.46265e-09	3.75354e-08	camera-type eye development
GO:0035845	0	1	1	inf	4.46265e-09	3.75354e-08	photoreceptor cell outer segment organization
GO:0042461	0	1	1	inf	4.46265e-09	3.75354e-08	photoreceptor cell development
GO:0042462	0	1	1	inf	4.46265e-09	3.75354e-08	eye photoreceptor cell development
GO:0042670	0	1	1	inf	4.46265e-09	3.75354e-08	retinal cone cell differentiation
GO:0046548	0	1	1	inf	4.46265e-09	3.75354e-08	retinal rod cell development
GO:0046549	0	1	1	inf	4.46265e-09	3.75354e-08	retinal cone cell development
GO:1901535	0	1	1	inf	4.46265e-09	3.75354e-08	regulation of DNA demethylation
GO:1901537	0	1	1	inf	4.46265e-09	3.75354e-08	positive regulation of DNA demethylation
GO:0060041	0	1	1	inf	4.46265e-09	3.75354e-08	retina development in camera-type eye
GO:0060042	0	1	1	inf	4.46265e-09	3.75354e-08	retina morphogenesis in camera-type eye
GO:0060219	0	1	1	inf	4.46265e-09	3.75354e-08	camera-type eye photoreceptor cell differentiation
GO:0003407	0	1	1	inf	4.46265e-09	3.75354e-08	neural retina development
GO:0003823	0	1	1	inf	4.46265e-09	3.75354e-08	antigen binding
GO:0010842	0	1	1	inf	4.46265e-09	3.75354e-08	retina layer formation
GO:0043680	0	1	1	3.63036	4.56686e-09	3.83849e-08	filiform apparatus
GO:1901981	1.60456	0.464018	1	1.70038	4.70448e-09	3.95137e-08	phosphatidylinositol phosphate binding
GO:0048509	0.8759	0.665355	1	1.34195	4.78896e-09	4.01949e-08	regulation of meristem development
GO:0009903	0	1	1	1.98059	4.83639e-09	4.05644e-08	chloroplast avoidance movement
GO:0032578	0	1	1	5.50973	5.03659e-09	4.22138e-08	aleurone grain membrane
GO:0016701	0	1	1	1.81506	5.04296e-09	4.22375e-08	oxidoreductase activity, acting on single donors with incorporation of molecular oxygen
GO:0009755	1.25988	0.290025	1	1.18661	5.29768e-09	4.43397e-08	hormone-mediated signaling pathway
GO:0042542	1.23779	0.480311	1	1.41002	5.62836e-09	4.70743e-08	response to hydrogen peroxide
GO:0048646	0.659096	0.832124	1	1.23584	5.6583e-09	4.72914e-08	anatomical structure formation involved in morphogenesis
GO:0043629	0	1	1	3.2974	5.70916e-09	4.76831e-08	ncRNA polyadenylation
GO:0042274	0	1	1	1.50651	5.7469e-09	4.79646e-08	ribosomal small subunit biogenesis
GO:1901659	0	1	1	1.53256	6.12614e-09	5.1094e-08	glycosyl compound biosynthetic process
GO:0050691	0	1	1	3.01155	6.25224e-09	5.21093e-08	regulation of defense response to virus by host
GO:0030371	0	1	1	2.80116	6.52268e-09	5.43253e-08	translation repressor activity
GO:0002443	0	1	1	2.15793	6.55074e-09	5.45209e-08	leukocyte mediated immunity
GO:0010469	0	1	1	2.95921	6.62027e-09	5.50611e-08	regulation of signaling receptor activity
GO:1901804	0	1	1	4.07889	6.70017e-09	5.56867e-08	beta-glucoside metabolic process
GO:0051899	0	1	1	6.03674	6.96352e-09	5.77948e-08	membrane depolarization
GO:0086010	0	1	1	6.03674	6.96352e-09	5.77948e-08	membrane depolarization during action potential
GO:0050864	0	1	1	3.08448	7.67487e-09	6.32579e-08	regulation of B cell activation
GO:0045191	0	1	1	3.08448	7.67487e-09	6.32579e-08	regulation of isotype switching
GO:0002889	0	1	1	3.08448	7.67487e-09	6.32579e-08	regulation of immunoglobulin mediated immune response
GO:0002712	0	1	1	3.08448	7.67487e-09	6.32579e-08	regulation of B cell mediated immunity
GO:0002706	0	1	1	3.08448	7.67487e-09	6.32579e-08	regulation of lymphocyte mediated immunity
GO:0002819	0	1	1	3.08448	7.67487e-09	6.32579e-08	regulation of adaptive immune response
GO:0002822	0	1	1	3.08448	7.67487e-09	6.32579e-08	regulation of adaptive immune response based on somatic recombination of immune receptors built from immunoglobulin superfamily domains
GO:0002637	0	1	1	3.08448	7.67487e-09	6.32579e-08	regulation of immunoglobulin production
GO:0002703	0	1	1	3.08448	7.67487e-09	6.32579e-08	regulation of leukocyte mediated immunity
GO:0002700	0	1	1	3.08448	7.67487e-09	6.32579e-08	regulation of production of molecular mediator of immune response
GO:0047714	0	1	1	2.68302	7.81166e-09	6.43408e-08	galactolipase activity
GO:0035265	0	1	1	2.33256	8.10777e-09	6.67336e-08	organ growth
GO:0009057	0.8604	0.716524	1	1.15108	8.2143e-09	6.75638e-08	macromolecule catabolic process
GO:0047429	0	1	1	3.44958	8.27111e-09	6.79372e-08	nucleoside-triphosphate diphosphatase activity
GO:0009143	0	1	1	3.44958	8.27111e-09	6.79372e-08	nucleoside triphosphate catabolic process
GO:0090207	0	1	1	3.52145	8.6174e-09	7.07328e-08	regulation of triglyceride metabolic process
GO:0016567	1.22677	0.33054	1	1.19153	1.04829e-08	8.59857e-08	protein ubiquitination
GO:0044430	1.5251	0.160461	1	1.21366	1.19532e-08	9.79107e-08	cytoskeletal part
GO:0008395	0	1	1	2.67254	1.20231e-08	9.84156e-08	steroid hydroxylase activity
GO:0072659	0	1	1	2.52661	1.2828e-08	1.04932e-07	protein localization to plasma membrane
GO:0051415	0	1	1	2.96326	1.36493e-08	1.11421e-07	microtubule nucleation by interphase microtubule organizing center
GO:0051418	0	1	1	2.96326	1.36493e-08	1.11421e-07	microtubule nucleation by microtubule organizing center
GO:0000923	0	1	1	2.96326	1.36493e-08	1.11421e-07	equatorial microtubule organizing center
GO:0006515	0	1	1	2.08869	1.49821e-08	1.22217e-07	protein quality control for misfolded or incompletely synthesized proteins
GO:0015185	0	1	1	8.47261	1.50055e-08	1.2224e-07	gamma-aminobutyric acid transmembrane transporter activity
GO:0015812	0	1	1	8.47261	1.50055e-08	1.2224e-07	gamma-aminobutyric acid transport
GO:0009718	0	1	1	1.82649	1.65543e-08	1.34673e-07	anthocyanin-containing compound biosynthetic process
GO:0000301	0	1	1	3.57013	1.72231e-08	1.40019e-07	retrograde transport, vesicle recycling within Golgi
GO:0007163	0	1	1	1.86196	1.83382e-08	1.48982e-07	establishment or maintenance of cell polarity
GO:0005242	0	1	1	2.63142	1.83848e-08	1.49259e-07	inward rectifier potassium channel activity
GO:0043161	1.81822	0.0958066	1	1.247	2.0247e-08	1.64265e-07	proteasome-mediated ubiquitin-dependent protein catabolic process
GO:0080046	0	1	1	2.78807	2.08243e-08	1.68834e-07	quercetin 4'-O-glucosyltransferase activity
GO:0051591	0	1	1	2.95506	2.12985e-08	1.72561e-07	response to cAMP
GO:0090354	6.60771	0.0377138	1	2.00771	2.241e-08	1.81443e-07	regulation of auxin metabolic process
GO:0031312	0	1	1	2.15809	2.32617e-08	1.88211e-07	extrinsic component of organelle membrane
GO:0007050	0	1	1	3.2092	2.47214e-08	1.9975e-07	cell cycle arrest
GO:0048188	0	1	1	2.93454	2.51069e-08	2.02728e-07	Set1C/COMPASS complex
GO:0051270	0	1	1	1.76075	2.62703e-08	2.11978e-07	regulation of cellular component movement
GO:1901575	0.814623	0.803984	1	1.11682	2.79908e-08	2.25708e-07	organic substance catabolic process
GO:1901071	0	1	1	2.71771	2.84376e-08	2.29156e-07	glucosamine-containing compound metabolic process
GO:0009561	0	1	1	1.48828	2.92106e-08	2.35225e-07	megagametogenesis
GO:0009269	0	1	1	2.02179	2.93277e-08	2.35786e-07	response to desiccation
GO:0001098	0	1	1	2.01227	2.93396e-08	2.35786e-07	basal transcription machinery binding
GO:0001099	0	1	1	2.01227	2.93396e-08	2.35786e-07	basal RNA polymerase II transcription machinery binding
GO:0051195	0	1	1	3.18177	2.97052e-08	2.38563e-07	negative regulation of cofactor metabolic process
GO:0048366	0.674789	0.842189	1	1.1941	3.16511e-08	2.54019e-07	leaf development
GO:1903321	0	1	1	2.47041	3.27106e-08	2.62169e-07	negative regulation of protein modification by small protein conjugation or removal
GO:0005509	0	1	1	1.36815	3.45654e-08	2.76849e-07	calcium ion binding
GO:0009654	0	1	1	5.03062	3.76969e-08	3.01727e-07	photosystem II oxygen evolving complex
GO:0004525	0	1	1	2.08821	4.03428e-08	3.22472e-07	ribonuclease III activity
GO:0032296	0	1	1	2.08821	4.03428e-08	3.22472e-07	double-stranded RNA-specific ribonuclease activity
GO:0033612	1.40738	0.508821	1	1.60155	4.28168e-08	3.42018e-07	receptor serine/threonine kinase binding
GO:0019757	0	1	1	1.4698	4.33781e-08	3.45805e-07	glycosinolate metabolic process
GO:0019760	0	1	1	1.4698	4.33781e-08	3.45805e-07	glucosinolate metabolic process
GO:0016143	0	1	1	1.4698	4.33781e-08	3.45805e-07	S-glycoside metabolic process
GO:0016436	0	1	1	3.78931	4.34094e-08	3.45824e-07	rRNA (uridine) methyltransferase activity
GO:0000769	0	1	1	6.84163	4.96679e-08	3.95418e-07	syncytium formation by mitosis without cytokinesis
GO:0005198	0.439029	0.941581	1	1.21898	5.16974e-08	4.113e-07	structural molecule activity
GO:0043270	0	1	1	2.16041	5.24217e-08	4.16784e-07	positive regulation of ion transport
GO:0008821	0	1	1	3.74072	5.4399e-08	4.32217e-07	crossover junction endodeoxyribonuclease activity
GO:2000033	0	1	1	2.2638	5.60938e-08	4.45385e-07	regulation of seed dormancy process
GO:0090288	0	1	1	3.35376	5.83524e-08	4.63009e-07	negative regulation of cellular response to growth factor stimulus
GO:0051788	0	1	1	1.92442	6.05903e-08	4.80446e-07	response to misfolded protein
GO:0007007	0	1	1	2.41647	6.11278e-08	4.84386e-07	inner mitochondrial membrane organization
GO:0010205	8.00523	0.0266264	1	2.08453	6.3539e-08	5.02823e-07	photoinhibition
GO:0043155	8.00523	0.0266264	1	2.08453	6.3539e-08	5.02823e-07	negative regulation of photosynthesis, light reaction
GO:0003723	0.945003	0.624009	1	1.10651	6.83725e-08	5.40715e-07	RNA binding
GO:0033194	0	1	1	30.1836	6.88248e-08	5.43931e-07	response to hydroperoxide
GO:0097366	0	1	1	1.81105	7.21569e-08	5.69509e-07	response to bronchodilator
GO:0071731	0	1	1	1.81105	7.21569e-08	5.69509e-07	response to nitric oxide
GO:0009682	0	1	1	1.71486	7.50052e-08	5.91597e-07	induced systemic resistance
GO:0045202	0	1	1	1.82461	7.86766e-08	6.20144e-07	synapse
GO:0004673	0	1	1	2.22043	8.10745e-08	6.37779e-07	protein histidine kinase activity
GO:0018106	0	1	1	2.22043	8.10745e-08	6.37779e-07	peptidyl-histidine phosphorylation
GO:0016775	0	1	1	2.22043	8.10745e-08	6.37779e-07	phosphotransferase activity, nitrogenous group as acceptor
GO:0048475	0	1	1	1.75045	8.15173e-08	6.40416e-07	coated membrane
GO:0030117	0	1	1	1.75045	8.15173e-08	6.40416e-07	membrane coat
GO:0060548	1.53324	0.37495	1	1.41933	8.26111e-08	6.48581e-07	negative regulation of cell death
GO:0051251	0	1	1	2.78009	8.86794e-08	6.95308e-07	positive regulation of lymphocyte activation
GO:0002696	0	1	1	2.78009	8.86794e-08	6.95308e-07	positive regulation of leukocyte activation
GO:2000050	0	1	1	2.96379	9.0919e-08	7.11462e-07	regulation of non-canonical Wnt signaling pathway
GO:1905330	0	1	1	2.96379	9.0919e-08	7.11462e-07	regulation of morphogenesis of an epithelium
GO:0090175	0	1	1	2.96379	9.0919e-08	7.11462e-07	regulation of establishment of planar polarity
GO:0007051	0	1	1	1.55931	9.5864e-08	7.49665e-07	spindle organization
GO:0098660	0.377123	0.96861	1	1.19768	9.68867e-08	7.57166e-07	inorganic ion transmembrane transport
GO:0009850	0	1	1	1.57735	1.11429e-07	8.70245e-07	auxin metabolic process
GO:0071407	0	1	1	1.27623	1.16541e-07	9.09566e-07	cellular response to organic cyclic compound
GO:0036092	0	1	1	3.39021	1.18645e-07	9.25388e-07	phosphatidylinositol-3-phosphate biosynthetic process
GO:0006928	2.60431	0.0302812	1	1.30403	1.20727e-07	9.41009e-07	movement of cell or subcellular component
GO:0061980	0	1	1	2.47815	1.22522e-07	9.54374e-07	regulatory RNA binding
GO:0072334	0	1	1	2.42217	1.28678e-07	1.00102e-06	UDP-galactose transmembrane transport
GO:0005459	0	1	1	2.42217	1.28678e-07	1.00102e-06	UDP-galactose transmembrane transporter activity
GO:0006261	0	1	1	1.32018	1.33329e-07	1.03652e-06	DNA-dependent DNA replication
GO:0009074	0	1	1	2.1828	1.37363e-07	1.06718e-06	aromatic amino acid family catabolic process
GO:0005655	0	1	1	2.68718	1.3953e-07	1.08331e-06	nucleolar ribonuclease P complex
GO:0045182	0	1	1	2.48992	1.44021e-07	1.11745e-06	translation regulator activity
GO:0006874	0	1	1	1.80859	1.49601e-07	1.16e-06	cellular calcium ion homeostasis
GO:0000324	0	1	1	2.54237	1.52396e-07	1.1809e-06	fungal-type vacuole
GO:0008180	0	1	1	5.03062	1.54834e-07	1.19901e-06	COP9 signalosome
GO:0071071	0	1	1	2.67059	1.61151e-07	1.24711e-06	regulation of phospholipid biosynthetic process
GO:0010498	1.71316	0.120021	1	1.22149	1.73459e-07	1.34149e-06	proteasomal protein catabolic process
GO:0045912	0	1	1	3.03573	1.77315e-07	1.37042e-06	negative regulation of carbohydrate metabolic process
GO:0043627	0	1	1	2.55701	1.78249e-07	1.37675e-06	response to estrogen
GO:0042343	0	1	1	2.38899	1.85659e-07	1.43305e-06	indole glucosinolate metabolic process
GO:0006085	0	1	1	2.69155	1.86317e-07	1.4372e-06	acetyl-CoA biosynthetic process
GO:0009615	0	1	1	1.37788	2.0124e-07	1.55117e-06	response to virus
GO:0044238	0.979036	0.59165	1	1.04612	2.01352e-07	1.55117e-06	primary metabolic process
GO:0002221	0	1	1	2.45275	2.11146e-07	1.62451e-06	pattern recognition receptor signaling pathway
GO:0002758	0	1	1	2.45275	2.11146e-07	1.62451e-06	innate immune response-activating signal transduction
GO:0042447	0	1	1	2.00173	2.11697e-07	1.62771e-06	hormone catabolic process
GO:0051139	0	1	1	3.28315	2.12641e-07	1.63285e-06	metal ion:proton antiporter activity
GO:0106018	0	1	1	3.28315	2.12641e-07	1.63285e-06	phosphatidylinositol-3,5-bisphosphate phosphatase activity
GO:0048557	0	1	1	2.75652	2.13138e-07	1.63351e-06	embryonic digestive tract morphogenesis
GO:0048546	0	1	1	2.75652	2.13138e-07	1.63351e-06	digestive tract morphogenesis
GO:0048566	0	1	1	2.75652	2.13138e-07	1.63351e-06	embryonic digestive tract development
GO:0030900	0	1	1	2.7139	2.14981e-07	1.64658e-06	forebrain development
GO:0032211	0	1	1	2.67452	2.1527e-07	1.64773e-06	negative regulation of telomere maintenance via telomerase
GO:0048046	1.37006	0.276817	1	1.21139	2.26896e-07	1.7356e-06	apoplast
GO:0022834	0	1	1	2.06538	2.2816e-07	1.74303e-06	ligand-gated channel activity
GO:0015276	0	1	1	2.06538	2.2816e-07	1.74303e-06	ligand-gated ion channel activity
GO:0051667	0	1	1	1.80635	2.35193e-07	1.79446e-06	establishment of plastid localization
GO:0009902	0	1	1	1.80635	2.35193e-07	1.79446e-06	chloroplast relocation
GO:1900049	0	1	1	7.82539	2.36453e-07	1.80291e-06	regulation of histone exchange
GO:0000287	0	1	1	1.46913	2.45258e-07	1.86886e-06	magnesium ion binding
GO:0009911	0	1	1	1.51856	2.47913e-07	1.88668e-06	positive regulation of flower development
GO:0070911	0	1	1	3.73703	2.62909e-07	1.99824e-06	global genome nucleotide-excision repair
GO:0016278	0	1	1	1.76198	2.65228e-07	2.0133e-06	lysine N-methyltransferase activity
GO:0016279	0	1	1	1.76198	2.65228e-07	2.0133e-06	protein-lysine N-methyltransferase activity
GO:0006873	0.886608	0.658889	1	1.29819	2.67186e-07	2.02687e-06	cellular ion homeostasis
GO:0006401	0	1	1	1.33434	2.81007e-07	2.13036e-06	RNA catabolic process
GO:0005688	0	1	1	3.15647	2.84103e-07	2.15246e-06	U6 snRNP
GO:0051090	0	1	1	1.67469	2.85343e-07	2.16048e-06	regulation of DNA-binding transcription factor activity
GO:0030004	0	1	1	1.64799	2.97727e-07	2.25281e-06	cellular monovalent inorganic cation homeostasis
GO:0048569	0	1	1	2.41668	3.06888e-07	2.31919e-06	post-embryonic animal organ development
GO:0003887	0	1	1	1.81067	3.20002e-07	2.41369e-06	DNA-directed DNA polymerase activity
GO:0009866	0	1	1	2.79072	3.25644e-07	2.45469e-06	induced systemic resistance, ethylene mediated signaling pathway
GO:0071219	0	1	1	1.98579	3.3035e-07	2.48702e-06	cellular response to molecule of bacterial origin
GO:0006121	0	1	1	2.70101	3.32355e-07	2.50054e-06	mitochondrial electron transport, succinate to ubiquinone
GO:0007444	0	1	1	2.48828	3.44355e-07	2.58918e-06	imaginal disc development
GO:0099111	0	1	1	1.97078	3.58133e-07	2.69108e-06	microtubule-based transport
GO:0043200	0	1	1	1.6534	3.79543e-07	2.85016e-06	response to amino acid
GO:0010016	1.28821	0.376471	1	1.24805	3.80406e-07	2.85484e-06	shoot system morphogenesis
GO:0015205	0	1	1	2.08165	3.87851e-07	2.90705e-06	nucleobase transmembrane transporter activity
GO:0015851	0	1	1	2.08165	3.87851e-07	2.90705e-06	nucleobase transport
GO:0000212	0	1	1	2.97464	3.89904e-07	2.9206e-06	meiotic spindle organization
GO:0016973	0	1	1	2.01795	3.98615e-07	2.98397e-06	poly(A)+ mRNA export from nucleus
GO:0009960	0	1	1	1.70658	4.02917e-07	3.01429e-06	endosperm development
GO:0048759	0	1	1	2.50143	4.04678e-07	3.02556e-06	xylem vessel member cell differentiation
GO:0042221	0.751063	0.962501	1	1.06324	4.10325e-07	3.06586e-06	response to chemical
GO:1901657	0.800746	0.712265	1	1.27726	4.19771e-07	3.13446e-06	glycosyl compound metabolic process
GO:0055075	0	1	1	1.75568	4.44863e-07	3.31975e-06	potassium ion homeostasis
GO:0014074	0	1	1	2.51532	4.7513e-07	3.54339e-06	response to purine-containing compound
GO:0071310	0.728208	0.867015	1	1.11983	4.83106e-07	3.60062e-06	cellular response to organic substance
GO:0046625	0	1	1	2.82973	4.95423e-07	3.69011e-06	sphingolipid binding
GO:0005460	0	1	1	2.37021	4.98695e-07	3.71216e-06	UDP-glucose transmembrane transporter activity
GO:0009816	1.2652	0.546506	1	1.513	5.00592e-07	3.72396e-06	defense response to bacterium, incompatible interaction
GO:0080074	0	1	1	inf	5.46004e-07	4.05165e-06	spermidine:caffeoyl CoA N-acyltransferase activity
GO:0080075	0	1	1	inf	5.46004e-07	4.05165e-06	spermidine:feruloyl CoA N-acyltransferase activity
GO:0010728	0	1	1	inf	5.46004e-07	4.05165e-06	regulation of hydrogen peroxide biosynthetic process
GO:0010730	0	1	1	inf	5.46004e-07	4.05165e-06	negative regulation of hydrogen peroxide biosynthetic process
GO:0035825	0	1	1	1.4569	5.58246e-07	4.13734e-06	homologous recombination
GO:0007131	0	1	1	1.4569	5.58246e-07	4.13734e-06	reciprocal meiotic recombination
GO:0043617	0	1	1	2.86296	5.63505e-07	4.17372e-06	cellular response to sucrose starvation
GO:0005267	0	1	1	1.76118	5.68097e-07	4.20512e-06	potassium channel activity
GO:0032952	0	1	1	26.8298	5.72867e-07	4.23516e-06	regulation of (1->3)-beta-D-glucan metabolic process
GO:0032953	0	1	1	26.8298	5.72867e-07	4.23516e-06	regulation of (1->3)-beta-D-glucan biosynthetic process
GO:0016071	0.675051	0.841976	1	1.1739	5.74176e-07	4.24221e-06	mRNA metabolic process
GO:0019210	8.74883	0.108501	1	2.59442	5.81691e-07	4.29506e-06	kinase inhibitor activity
GO:0000982	0	1	1	1.86321	5.95657e-07	4.39546e-06
GO:0050767	0	1	1	1.82565	6.091e-07	4.49188e-06	regulation of neurogenesis
GO:0015631	0	1	1	1.3264	6.13027e-07	4.51804e-06	tubulin binding
GO:0055074	0	1	1	1.70223	6.27051e-07	4.61854e-06	calcium ion homeostasis
GO:0009851	0	1	1	1.79463	6.71661e-07	4.94405e-06	auxin biosynthetic process
GO:0030011	0	1	1	2.7862	6.74747e-07	4.9637e-06	maintenance of cell polarity
GO:0009897	0	1	1	1.98432	6.79861e-07	4.99824e-06	external side of plasma membrane
GO:0090332	0	1	1	1.8865	7.02629e-07	5.16244e-06	stomatal closure
GO:0004016	0	1	1	2.17233	7.23575e-07	5.31306e-06	adenylate cyclase activity
GO:0007423	0	1	1	2.41052	7.331e-07	5.37309e-06	sensory organ development
GO:0051047	0	1	1	2.07824	7.33105e-07	5.37309e-06	positive regulation of secretion
GO:1903532	0	1	1	2.07824	7.33105e-07	5.37309e-06	positive regulation of secretion by cell
GO:0006073	0	1	1	1.27114	7.61615e-07	5.57862e-06	cellular glucan metabolic process
GO:0045549	0	1	1	2.56219	7.64084e-07	5.58983e-06	9-cis-epoxycarotenoid dioxygenase activity
GO:0010436	0	1	1	2.56219	7.64084e-07	5.58983e-06	carotenoid dioxygenase activity
GO:1905421	0	1	1	1.6769	7.67745e-07	5.61316e-06	regulation of plant organ morphogenesis
GO:0016655	0	1	1	1.78784	7.74375e-07	5.65816e-06	oxidoreductase activity, acting on NAD(P)H, quinone or similar compound as acceptor
GO:2000034	0	1	1	1.98392	8.14476e-07	5.94752e-06	regulation of seed maturation
GO:0009952	0	1	1	3.11173	8.40801e-07	6.13224e-06	anterior/posterior pattern specification
GO:0035282	0	1	1	3.11173	8.40801e-07	6.13224e-06	segmentation
GO:2000241	0.511607	0.931627	1	1.17191	8.54316e-07	6.22699e-06	regulation of reproductive process
GO:0071033	0	1	1	2.54637	8.74084e-07	6.36329e-06	nuclear retention of pre-mRNA at the site of transcription
GO:0044042	0	1	1	1.26569	8.81187e-07	6.41108e-06	glucan metabolic process
GO:0001101	0.98435	0.557871	1	1.09296	8.877e-07	6.45453e-06	response to acid chemical
GO:0090333	0	1	1	1.84935	8.95686e-07	6.50862e-06	regulation of stomatal closure
GO:0031465	0	1	1	5.18305	9.47055e-07	6.8777e-06	Cul4B-RING E3 ubiquitin ligase complex
GO:0046034	1.64245	0.343973	1	1.39264	9.83811e-07	7.14027e-06	ATP metabolic process
GO:1900151	0	1	1	2.53075	9.98694e-07	7.23947e-06	regulation of nuclear-transcribed mRNA catabolic process, deadenylation-dependent decay
GO:0060211	0	1	1	2.53075	9.98694e-07	7.23947e-06	regulation of nuclear-transcribed mRNA poly(A) tail shortening
GO:0050714	0	1	1	2.12202	1.11041e-06	8.03951e-06	positive regulation of protein secretion
GO:0002793	0	1	1	2.12202	1.11041e-06	8.03951e-06	positive regulation of peptide secretion
GO:0046488	0	1	1	1.4273	1.13366e-06	8.20282e-06	phosphatidylinositol metabolic process
GO:0048660	0	1	1	2.86225	1.17038e-06	8.4634e-06	regulation of smooth muscle cell proliferation
GO:0004568	0	1	1	2.26606	1.18402e-06	8.55682e-06	chitinase activity
GO:0051480	0	1	1	2.16161	1.27185e-06	9.18602e-06	regulation of cytosolic calcium ion concentration
GO:0000741	0	1	1	1.68199	1.27713e-06	9.213e-06	karyogamy
GO:0010197	0	1	1	1.68199	1.27713e-06	9.213e-06	polar nucleus fusion
GO:0009152	0	1	1	1.35829	1.29608e-06	9.34405e-06	purine ribonucleotide biosynthetic process
GO:0010340	0	1	1	3.104	1.32279e-06	9.53084e-06	carboxyl-O-methyltransferase activity
GO:0043486	0	1	1	2.19444	1.33174e-06	9.58947e-06	histone exchange
GO:0051924	0	1	1	2.2719	1.41134e-06	1.01565e-05	regulation of calcium ion transport
GO:0031034	0	1	1	2.683	1.41981e-06	1.02052e-05	myosin filament assembly
GO:0016460	0	1	1	2.683	1.41981e-06	1.02052e-05	myosin II complex
GO:0045911	0	1	1	2.31804	1.42308e-06	1.02225e-05	positive regulation of DNA recombination
GO:0045239	0	1	1	2.87464	1.55845e-06	1.1168e-05	tricarboxylic acid cycle enzyme complex
GO:0045240	0	1	1	2.87464	1.55845e-06	1.1168e-05	dihydrolipoyl dehydrogenase complex
GO:0005947	0	1	1	2.87464	1.55845e-06	1.1168e-05	mitochondrial alpha-ketoglutarate dehydrogenase complex
GO:0030062	0	1	1	2.87464	1.55845e-06	1.1168e-05	mitochondrial tricarboxylic acid cycle enzyme complex
GO:0016298	0	1	1	1.39631	1.66233e-06	1.19052e-05	lipase activity
GO:0010015	0.62247	0.859263	1	1.18469	1.6814e-06	1.2029e-05	root morphogenesis
GO:0030286	0	1	1	2.47013	1.68164e-06	1.2029e-05	dynein complex
GO:0009574	0	1	1	1.82933	1.72624e-06	1.23407e-05	preprophase band
GO:0018022	0	1	1	1.41901	1.79487e-06	1.28236e-05	peptidyl-lysine methylation
GO:0072359	0	1	1	1.81937	1.80685e-06	1.29015e-05	circulatory system development
GO:0061983	0	1	1	1.84189	1.82235e-06	1.29965e-05	meiosis II cell cycle process
GO:0007135	0	1	1	1.84189	1.82235e-06	1.29965e-05	meiosis II
GO:0006722	0	1	1	2.42858	1.83405e-06	1.30721e-05	triterpenoid metabolic process
GO:0050804	0	1	1	2.05333	1.84158e-06	1.31101e-05	modulation of chemical synaptic transmission
GO:0099177	0	1	1	2.05333	1.84158e-06	1.31101e-05	regulation of trans-synaptic signaling
GO:0019901	1.51985	0.379009	1	1.36546	1.86002e-06	1.32335e-05	protein kinase binding
GO:0042771	0	1	1	2.45543	1.90999e-06	1.35809e-05	intrinsic apoptotic signaling pathway in response to DNA damage by p53 class mediator
GO:0048878	0.645018	0.86583	1	1.16095	1.93834e-06	1.37742e-05	chemical homeostasis
GO:0000313	0	1	1	1.5945	1.95968e-06	1.39176e-05	organellar ribosome
GO:0006297	0	1	1	2.25674	2.10195e-06	1.49191e-05	nucleotide-excision repair, DNA gap filling
GO:0006865	1.9038	0.283059	1	1.40961	2.19339e-06	1.55588e-05	amino acid transport
GO:0016831	0	1	1	1.52781	2.23501e-06	1.58446e-05	carboxy-lyase activity
GO:0044391	0	1	1	1.23355	2.35685e-06	1.66984e-05	ribosomal subunit
GO:0051701	0	1	1	1.43941	2.38444e-06	1.68839e-05	interaction with host
GO:0006164	0	1	1	1.34646	2.40478e-06	1.70178e-05	purine nucleotide biosynthetic process
GO:0009965	1.16528	0.511948	1	1.31238	2.50018e-06	1.76824e-05	leaf morphogenesis
GO:0048524	0	1	1	2.30999	2.5368e-06	1.79201e-05	positive regulation of viral process
GO:0010587	0	1	1	2.30999	2.5368e-06	1.79201e-05	miRNA catabolic process
GO:0005262	0	1	1	1.67424	2.60319e-06	1.83782e-05	calcium channel activity
GO:0006596	0	1	1	2.05477	2.64696e-06	1.86761e-05	polyamine biosynthetic process
GO:0042719	0	1	1	4.41712	2.74288e-06	1.933e-05	mitochondrial intermembrane space protein transporter complex
GO:0072321	0	1	1	4.41712	2.74288e-06	1.933e-05	chaperone-mediated protein transport
GO:0044265	1.07801	0.456153	1	1.13563	2.79672e-06	1.96978e-05	cellular macromolecule catabolic process
GO:0051176	0	1	1	2.07909	2.86276e-06	2.0151e-05	positive regulation of sulfur metabolic process
GO:0009832	0	1	1	1.26294	3.09146e-06	2.1748e-05	plant-type cell wall biogenesis
GO:0030137	0	1	1	1.9522	3.10032e-06	2.17974e-05	COPI-coated vesicle
GO:0080060	0	1	1	1.97465	3.15666e-06	2.21804e-05	integument development
GO:0006281	0.420056	0.950679	1	1.17992	3.34708e-06	2.35045e-05	DNA repair
GO:0032790	0	1	1	2.6518	3.39294e-06	2.38125e-05	ribosome disassembly
GO:0046209	0	1	1	2.23057	3.48586e-06	2.44359e-05	nitric oxide metabolic process
GO:0006809	0	1	1	2.23057	3.48586e-06	2.44359e-05	nitric oxide biosynthetic process
GO:0080073	0	1	1	60.3671	3.52585e-06	2.47017e-05	spermidine:coumaroyl CoA N-acyltransferase activity
GO:0051272	0	1	1	1.92054	3.57094e-06	2.50029e-05	positive regulation of cellular component movement
GO:0042405	0	1	1	2.37076	4.00437e-06	2.80047e-05	nuclear inclusion body
GO:0046649	0	1	1	2.37076	4.00437e-06	2.80047e-05	lymphocyte activation
GO:0007349	0	1	1	2.31356	4.03358e-06	2.81924e-05	cellularization
GO:0048367	0.963691	0.589069	1	1.10836	4.1543e-06	2.90003e-05	shoot system development
GO:0042546	0	1	1	1.23759	4.15843e-06	2.90003e-05	cell wall biogenesis
GO:0051452	0	1	1	1.97981	4.1589e-06	2.90003e-05	intracellular pH reduction
GO:0007035	0	1	1	1.97981	4.1589e-06	2.90003e-05	vacuolar acidification
GO:0090615	0	1	1	1.92916	4.34269e-06	3.02642e-05	mitochondrial mRNA processing
GO:0044766	0	1	1	2.10963	4.41762e-06	3.07503e-05	multi-organism transport
GO:1902579	0	1	1	2.10963	4.41762e-06	3.07503e-05	multi-organism localization
GO:0030656	0	1	1	2.82091	4.45128e-06	3.09304e-05	regulation of vitamin metabolic process
GO:0016528	0	1	1	2.82091	4.45128e-06	3.09304e-05	sarcoplasm
GO:0016529	0	1	1	2.82091	4.45128e-06	3.09304e-05	sarcoplasmic reticulum
GO:0034767	0	1	1	2.02648	4.59957e-06	3.19422e-05	positive regulation of ion transmembrane transport
GO:0051644	0	1	1	1.67132	4.6959e-06	3.25732e-05	plastid localization
GO:0019750	0	1	1	1.67132	4.6959e-06	3.25732e-05	chloroplast localization
GO:0050879	0	1	1	2.48178	4.76839e-06	3.30568e-05	multicellular organismal movement
GO:0050953	0	1	1	2.86055	5.07536e-06	3.51439e-05	sensory perception of light stimulus
GO:0007601	0	1	1	2.86055	5.07536e-06	3.51439e-05	visual perception
GO:0005976	0	1	1	1.18551	5.18892e-06	3.59093e-05	polysaccharide metabolic process
GO:0019079	0	1	1	2.79479	5.19759e-06	3.59485e-05	viral genome replication
GO:0019863	0	1	1	2.18926	5.34531e-06	3.69273e-05	IgE binding
GO:0019865	0	1	1	2.18926	5.34531e-06	3.69273e-05	immunoglobulin binding
GO:0006812	0.596422	0.901543	1	1.14711	5.36996e-06	3.70761e-05	cation transport
GO:0030119	0	1	1	2.14349	5.63462e-06	3.88808e-05	AP-type membrane coat adaptor complex
GO:0044248	1.02007	0.50187	1	1.09476	5.71849e-06	3.94367e-05	cellular catabolic process
GO:0009944	0	1	1	1.63574	5.72385e-06	3.94508e-05	polarity specification of adaxial/abaxial axis
GO:0016623	0	1	1	2.4198	5.90246e-06	4.06583e-05	oxidoreductase activity, acting on the aldehyde or oxo group of donors, oxygen as acceptor
GO:0016830	1.63168	0.346867	1	1.35793	6.00505e-06	4.13412e-05	carbon-carbon lyase activity
GO:1902017	0	1	1	inf	6.03944e-06	4.14342e-05	regulation of cilium assembly
GO:0097546	0	1	1	inf	6.03944e-06	4.14342e-05	ciliary base
GO:0101006	0	1	1	inf	6.03944e-06	4.14342e-05	protein histidine phosphatase activity
GO:0060629	0	1	1	inf	6.03944e-06	4.14342e-05	regulation of homologous chromosome segregation
GO:0080118	0	1	1	inf	6.03944e-06	4.14342e-05	brassinosteroid sulfotransferase activity
GO:0090173	0	1	1	inf	6.03944e-06	4.14342e-05	regulation of synaptonemal complex assembly
GO:1990428	0	1	1	2.76915	6.05705e-06	4.1531e-05	miRNA transport
GO:0022622	0.919655	0.639707	1	1.12777	6.11441e-06	4.19002e-05	root system development
GO:0046717	0	1	1	3.90129	6.23684e-06	4.27024e-05	acid secretion
GO:0009544	0	1	1	3.21959	6.23863e-06	4.27024e-05	chloroplast ATP synthase complex
[truncated: 9,912 more rows]

## Sheet: Supplemental_Table_S9
Supplemental Table S9. Gene in Wolffia unique orthogroups (OGs).
OG	geneID	Annotation
OG0017939	wa8730.asm1v1.ann1.run1_013910	14 kDa proline-rich protein DC2.15 (Daucus carota OX=4039)
OG0019596	wa8730.asm1v1.ann1.run1_013965	14 kDa proline-rich protein DC2.15 (Daucus carota OX=4039)
OG0024859	wa8730.asm1v1.ann1.run1_004491	ABC1 Protein ABC transporter 1, mitochondrial (Arabidopsis thaliana OX=3702)
OG0024860	wa8730.asm1v1.ann1.run1_004493	ABC1 Protein ABC transporter 1, mitochondrial (Arabidopsis thaliana OX=3702)
OG0025034	wa8730.asm1v1.ann1.run1_011296	ABCG28 ABC transporter G family member 28 (Arabidopsis thaliana OX=3702)
OG0025086	wa8730.asm1v1.ann1.run1_005937	APG GDSL esterase/lipase APG (Arabidopsis thaliana OX=3702)
OG0017194	wa8730.asm1v1.ann1.run1_007865	APX3 L-ascorbate peroxidase 3 (Arabidopsis thaliana OX=3702)
OG0017194	wa8730.asm1v1.ann1.run1_013154	APX3 L-ascorbate peroxidase 3 (Arabidopsis thaliana OX=3702)
OG0017185	wa8730.asm1v1.ann1.run1_000289	ARF17 Auxin response factor 17 (Arabidopsis thaliana OX=3702)
OG0017185	wa8730.asm1v1.ann1.run1_000296	ARF17 Auxin response factor 17 (Arabidopsis thaliana OX=3702)
OG0025023	wa8730.asm1v1.ann1.run1_006930	ARID1 AT-rich interactive domain-containing protein 1 (Arabidopsis thaliana OX=3702)
OG0025046	wa8730.asm1v1.ann1.run1_006204	ASB1 Anthranilate synthase beta subunit 1, chloroplastic (Arabidopsis thaliana OX=3702)
OG0024908	wa8730.asm1v1.ann1.run1_009524	At1g55760 BTB/POZ domain-containing protein At1g55760 (Arabidopsis thaliana OX=3702)
OG0025044	wa8730.asm1v1.ann1.run1_009798	At1g63330 Pentatricopeptide repeat-containing protein At1g63330 (Arabidopsis thaliana OX=3702)
OG0025042	wa8730.asm1v1.ann1.run1_000102	At1g66250 Glucan endo-1,3-beta-glucosidase 2 (Arabidopsis thaliana OX=3702)
OG0025038	wa8730.asm1v1.ann1.run1_003942	At2g34160 Uncharacterized protein At2g34160 (Arabidopsis thaliana OX=3702)
OG0024986	wa8730.asm1v1.ann1.run1_014104	At3g02090 Probable mitochondrial-processing peptidase subunit beta, mitochondrial (Arabidopsis thaliana OX=3702)
OG0017190	wa8730.asm1v1.ann1.run1_000477	At3g03980 NADPH-dependent aldehyde reductase-like protein, chloroplastic (Arabidopsis thaliana OX=3702)
OG0017190	wa8730.asm1v1.ann1.run1_006156	At3g03980 NADPH-dependent aldehyde reductase-like protein, chloroplastic (Arabidopsis thaliana OX=3702)
OG0019595	wa8730.asm1v1.ann1.run1_000471	At3g03980 NADPH-dependent aldehyde reductase-like protein, chloroplastic (Arabidopsis thaliana OX=3702)
OG0017196	wa8730.asm1v1.ann1.run1_013901	At3g13620 Probable polyamine transporter At3g13620 (Arabidopsis thaliana OX=3702)
OG0017196	wa8730.asm1v1.ann1.run1_014167	At3g13620 Probable polyamine transporter At3g13620 (Arabidopsis thaliana OX=3702)
OG0024982	wa8730.asm1v1.ann1.run1_011490	At3g13620 Probable polyamine transporter At3g13620 (Arabidopsis thaliana OX=3702)
OG0019593	wa8730.asm1v1.ann1.run1_014071	At4g00165 Putative lipid-binding protein At4g00165 (Arabidopsis thaliana OX=3702)
OG0025069	wa8730.asm1v1.ann1.run1_004640	At5g22810 GDSL esterase/lipase At5g22810 (Arabidopsis thaliana OX=3702)
OG0014173	wa8730.asm1v1.ann1.run1_013895	At5g64080 Non-specific lipid-transfer protein-like protein At5g64080 (Arabidopsis thaliana OX=3702)
OG0025029	wa8730.asm1v1.ann1.run1_010332	At5g66720 Probable protein phosphatase 2C 80 (Arabidopsis thaliana OX=3702)
OG0013143	wa8730.asm1v1.ann1.run1_006441	AZI1 pEARLI1-like lipid transfer protein 1 (Arabidopsis thaliana OX=3702)
OG0013143	wa8730.asm1v1.ann1.run1_006442	AZI1 pEARLI1-like lipid transfer protein 1 (Arabidopsis thaliana OX=3702)
OG0013143	wa8730.asm1v1.ann1.run1_006443	AZI1 pEARLI1-like lipid transfer protein 1 (Arabidopsis thaliana OX=3702)
OG0013143	wa8730.asm1v1.ann1.run1_006444	AZI1 pEARLI1-like lipid transfer protein 1 (Arabidopsis thaliana OX=3702)
OG0024878	wa8730.asm1v1.ann1.run1_014032	B'ETA Serine/threonine protein phosphatase 2A 59 kDa regulatory subunit B' eta isoform (Arabidopsis thaliana OX=3702)
OG0024989	wa8730.asm1v1.ann1.run1_011562	B'ETA Serine/threonine protein phosphatase 2A 59 kDa regulatory subunit B' eta isoform (Arabidopsis thaliana OX=3702)
OG0017195	wa8730.asm1v1.ann1.run1_001537	BB E3 ubiquitin ligase BIG BROTHER (Arabidopsis thaliana OX=3702)
OG0017195	wa8730.asm1v1.ann1.run1_011876	BB E3 ubiquitin ligase BIG BROTHER (Arabidopsis thaliana OX=3702)
OG0019588	wa8730.asm1v1.ann1.run1_013630	BHLH13 Transcription factor bHLH13 (Arabidopsis thaliana OX=3702)
OG0024843	wa8730.asm1v1.ann1.run1_013631	BHLH3 Transcription factor bHLH3 (Arabidopsis thaliana OX=3702)
OG0024873	wa8730.asm1v1.ann1.run1_002551	BHLH48 Transcription factor bHLH48 (Arabidopsis thaliana OX=3702)
OG0025061	wa8730.asm1v1.ann1.run1_012639	CAF1-9 Probable CCR4-associated factor 1 homolog 9 (Arabidopsis thaliana OX=3702)
OG0025019	wa8730.asm1v1.ann1.run1_013693	CCR1 Cinnamoyl-CoA reductase 1 (Arabidopsis thaliana OX=3702)
OG0024909	wa8730.asm1v1.ann1.run1_007123	CER3 Protein ECERIFERUM 3 (Arabidopsis thaliana OX=3702)
OG0024980	wa8730.asm1v1.ann1.run1_005315	CER3 Protein ECERIFERUM 3 (Arabidopsis thaliana OX=3702)
OG0025010	wa8730.asm1v1.ann1.run1_010772	CER3 Protein ECERIFERUM 3 (Arabidopsis thaliana OX=3702)
OG0025089	wa8730.asm1v1.ann1.run1_013690	CGT UDP-glycosyltransferase 13 (Mangifera indica OX=29780)
OG0025027	wa8730.asm1v1.ann1.run1_007172	CID7 Polyadenylate-binding protein-interacting protein 7 (Arabidopsis thaliana OX=3702)
OG0025110	wa8730.asm1v1.ann1.run1_008485	CIPK2 CBL-interacting protein kinase 2 (Oryza sativa subsp. japonica OX=39947)
OG0024893	wa8730.asm1v1.ann1.run1_007303	CNX2 GTP 3',8-cyclase, mitochondrial (Arabidopsis thaliana OX=3702)
OG0024951	wa8730.asm1v1.ann1.run1_000324	Cortical cell-delineating protein (Zea mays OX=4577)
OG0024932	wa8730.asm1v1.ann1.run1_013146	CP31B RNA-binding protein CP31B, chloroplastic (Arabidopsis thaliana OX=3702)
OG0024896	wa8730.asm1v1.ann1.run1_005365	CPN60-2 Chaperonin CPN60-2, mitochondrial (Cucurbita maxima OX=3661)
OG0024935	wa8730.asm1v1.ann1.run1_012665	CRR4 Pentatricopeptide repeat-containing protein At2g45350, chloroplastic (Arabidopsis thaliana OX=3702)
OG0024863	wa8730.asm1v1.ann1.run1_010545	CXE18 Probable carboxylesterase 18 (Arabidopsis thaliana OX=3702)
OG0025109	wa8730.asm1v1.ann1.run1_013131	CYP76M6 Oryzalexin E synthase (Oryza sativa subsp. japonica OX=39947)
OG0024848	wa8730.asm1v1.ann1.run1_013362	CYP84A1 Cytochrome P450 84A1 (Arabidopsis thaliana OX=3702)
OG0019600	wa8730.asm1v1.ann1.run1_012349	CYP89A2 Cytochrome P450 89A2 (Arabidopsis thaliana OX=3702)
OG0010094	wa8730.asm1v1.ann1.run1_008363	Cysteine proteinase inhibitor 1 (Actinidia deliciosa OX=3627)
OG0010094	wa8730.asm1v1.ann1.run1_011048	Cysteine proteinase inhibitor 1 (Actinidia deliciosa OX=3627)
OG0010094	wa8730.asm1v1.ann1.run1_011049	Cysteine proteinase inhibitor 1 (Actinidia deliciosa OX=3627)
OG0010094	wa8730.asm1v1.ann1.run1_011050	Cysteine proteinase inhibitor 1 (Actinidia deliciosa OX=3627)
OG0010094	wa8730.asm1v1.ann1.run1_013432	Cysteine proteinase inhibitor 1 (Actinidia deliciosa OX=3627)
OG0010094	wa8730.asm1v1.ann1.run1_013771	Cysteine proteinase inhibitor 1 (Actinidia deliciosa OX=3627)
OG0010094	wa8730.asm1v1.ann1.run1_013772	Cysteine proteinase inhibitor 1 (Actinidia deliciosa OX=3627)
OG0010094	wa8730.asm1v1.ann1.run1_013906	Cysteine proteinase inhibitor 1 (Actinidia deliciosa OX=3627)
OG0010094	wa8730.asm1v1.ann1.run1_013907	Cysteine proteinase inhibitor 1 (Actinidia deliciosa OX=3627)
OG0010094	wa8730.asm1v1.ann1.run1_014155	Cysteine proteinase inhibitor 1 (Actinidia deliciosa OX=3627)
OG0015682	wa8730.asm1v1.ann1.run1_013377	Cysteine proteinase inhibitor 1 (Actinidia deliciosa OX=3627)
OG0017192	wa8730.asm1v1.ann1.run1_004133	Cysteine proteinase inhibitor 1 (Actinidia deliciosa OX=3627)
OG0017192	wa8730.asm1v1.ann1.run1_004135	Cysteine proteinase inhibitor 1 (Actinidia deliciosa OX=3627)
OG0025098	wa8730.asm1v1.ann1.run1_011051	DBR1 Lariat debranching enzyme (Oryza sativa subsp. japonica OX=39947)
OG0024872	wa8730.asm1v1.ann1.run1_007619	DREB2E Dehydration-responsive element-binding protein 2E (Oryza sativa subsp. japonica OX=39947)
OG0019597	wa8730.asm1v1.ann1.run1_013633	DTM1 Signal peptidase complex-like protein DTM1 (Oryza sativa subsp. japonica OX=39947)
OG0024988	wa8730.asm1v1.ann1.run1_013481	EARLI1 Lipid transfer protein EARLI 1 (Arabidopsis thaliana OX=3702)
OG0025036	wa8730.asm1v1.ann1.run1_005099	EMB2744 Pentatricopeptide repeat-containing protein At5g39680 (Arabidopsis thaliana OX=3702)
OG0024999	wa8730.asm1v1.ann1.run1_013667	ERG1 Elicitor-responsive protein 1 (Oryza sativa subsp. indica OX=39946)
OG0025124	wa8730.asm1v1.ann1.run1_013804	EXL1 Protein EXORDIUM-like 1 (Arabidopsis thaliana OX=3702)
OG0024912	wa8730.asm1v1.ann1.run1_000224	EXT3 Extensin-3 (Arabidopsis thaliana OX=3702)
OG0024854	wa8730.asm1v1.ann1.run1_009975	FBL4 F-box/LRR-repeat protein 4 (Arabidopsis thaliana OX=3702)
OG0024849	wa8730.asm1v1.ann1.run1_013842	FER2 Ferritin-2, chloroplastic (Nicotiana tabacum OX=4097)
OG0024838	wa8730.asm1v1.ann1.run1_002505	FH3 Formin-like protein 3 (Oryza sativa subsp. japonica OX=39947)
OG0010561	wa8730.asm1v1.ann1.run1_008886	FLA12 Fasciclin-like arabinogalactan protein 12 (Arabidopsis thaliana OX=3702)
OG0010561	wa8730.asm1v1.ann1.run1_013345	FLA12 Fasciclin-like arabinogalactan protein 12 (Arabidopsis thaliana OX=3702)
OG0015684	wa8730.asm1v1.ann1.run1_012599	FLA13 Fasciclin-like arabinogalactan protein 13 (Arabidopsis thaliana OX=3702)
OG0024900	wa8730.asm1v1.ann1.run1_005491	FLA13 Fasciclin-like arabinogalactan protein 13 (Arabidopsis thaliana OX=3702)
OG0010561	wa8730.asm1v1.ann1.run1_012736	FLA6 Fasciclin-like arabinogalactan protein 6 (Arabidopsis thaliana OX=3702)
OG0010561	wa8730.asm1v1.ann1.run1_012737	FLA6 Fasciclin-like arabinogalactan protein 6 (Arabidopsis thaliana OX=3702)
OG0010561	wa8730.asm1v1.ann1.run1_013346	FLA6 Fasciclin-like arabinogalactan protein 6 (Arabidopsis thaliana OX=3702)
OG0015684	wa8730.asm1v1.ann1.run1_012598	FLA6 Fasciclin-like arabinogalactan protein 6 (Arabidopsis thaliana OX=3702)
OG0024833	wa8730.asm1v1.ann1.run1_013459	FPF1 Flowering-promoting factor 1 (Sinapis alba OX=3728)
OG0025081	wa8730.asm1v1.ann1.run1_005593	GFT1 GDP-fucose transporter 1 (Arabidopsis thaliana OX=3702)
OG0024834	wa8730.asm1v1.ann1.run1_010726	GSO2 LRR receptor-like serine/threonine-protein kinase GSO2 (Arabidopsis thaliana OX=3702)
OG0017197	wa8730.asm1v1.ann1.run1_012123	HD16 Casein kinase 1-like protein HD16 (Oryza sativa subsp. japonica OX=39947)
OG0017197	wa8730.asm1v1.ann1.run1_013065	HD16 Casein kinase 1-like protein HD16 (Oryza sativa subsp. japonica OX=39947)
OG0019603	wa8730.asm1v1.ann1.run1_007043	HD16 Casein kinase 1-like protein HD16 (Oryza sativa subsp. japonica OX=39947)
OG0019603	wa8730.asm1v1.ann1.run1_011844	HD16 Casein kinase 1-like protein HD16 (Oryza sativa subsp. japonica OX=39947)
OG0019604	wa8730.asm1v1.ann1.run1_013127	HD16 Casein kinase 1-like protein HD16 (Oryza sativa subsp. japonica OX=39947)
OG0025112	wa8730.asm1v1.ann1.run1_013884	HD16 Casein kinase 1-like protein HD16 (Oryza sativa subsp. japonica OX=39947)
OG0025113	wa8730.asm1v1.ann1.run1_014023	HD16 Casein kinase 1-like protein HD16 (Oryza sativa subsp. japonica OX=39947)
OG0025114	wa8730.asm1v1.ann1.run1_013066	HD16 Casein kinase 1-like protein HD16 (Oryza sativa subsp. japonica OX=39947)
OG0025117	wa8730.asm1v1.ann1.run1_011425	HO1 Heme oxygenase 1, chloroplastic (Arabidopsis thaliana OX=3702)
OG0024922	wa8730.asm1v1.ann1.run1_009145	HOP Hsp70-Hsp90 organizing protein (Triticum aestivum OX=4565)
OG0024885	wa8730.asm1v1.ann1.run1_012868	HSL1 Receptor-like protein kinase HSL1 (Arabidopsis thaliana OX=3702)
OG0024940	wa8730.asm1v1.ann1.run1_008226	HSL1 Receptor-like protein kinase HSL1 (Arabidopsis thaliana OX=3702)
OG0025080	wa8730.asm1v1.ann1.run1_012456	HSL1 Receptor-like protein kinase HSL1 (Arabidopsis thaliana OX=3702)
OG0024858	wa8730.asm1v1.ann1.run1_007366	ICP55 Intermediate cleaving peptidase 55, mitochondrial (Arabidopsis thaliana OX=3702)
OG0024929	wa8730.asm1v1.ann1.run1_012043	IQD1 Protein IQ-DOMAIN 1 (Arabidopsis thaliana OX=3702)
OG0025137	wa8730.asm1v1.ann1.run1_009956	KCR1 Very-long-chain 3-oxoacyl-CoA reductase 1 (Arabidopsis thaliana OX=3702)
OG0024881	wa8730.asm1v1.ann1.run1_001327	KCS20 3-ketoacyl-CoA synthase 20 (Arabidopsis thaliana OX=3702)
OG0024835	wa8730.asm1v1.ann1.run1_000641	KEA6 K(+) efflux antiporter 6 (Arabidopsis thaliana OX=3702)
OG0025045	wa8730.asm1v1.ann1.run1_006654	KIN14E Kinesin-like protein KIN-14E (Oryza sativa subsp. japonica OX=39947)
OG0024897	wa8730.asm1v1.ann1.run1_001650	KIN4C Kinesin-like protein KIN-4C (Arabidopsis thaliana OX=3702)
OG0025018	wa8730.asm1v1.ann1.run1_005587	KIN7J Kinesin-like protein KIN-7J (Oryza sativa subsp. japonica OX=39947)
OG0024979	wa8730.asm1v1.ann1.run1_009516	KRP4 Cyclin-dependent kinase inhibitor 4 (Oryza sativa subsp. japonica OX=39947)
OG0025134	wa8730.asm1v1.ann1.run1_014179	LBD10 LOB domain-containing protein 10 (Arabidopsis thaliana OX=3702)
OG0025057	wa8730.asm1v1.ann1.run1_010147	LBD25 LOB domain-containing protein 25 (Arabidopsis thaliana OX=3702)
OG0024879	wa8730.asm1v1.ann1.run1_009694	LBD29 LOB domain-containing protein 29 (Arabidopsis thaliana OX=3702)
OG0024851	wa8730.asm1v1.ann1.run1_008933	LBD40 LOB domain-containing protein 40 (Arabidopsis thaliana OX=3702)
OG0024852	wa8730.asm1v1.ann1.run1_008934	LBD40 LOB domain-containing protein 40 (Arabidopsis thaliana OX=3702)
OG0024850	wa8730.asm1v1.ann1.run1_013088	LBD42 LOB domain-containing protein 42 (Arabidopsis thaliana OX=3702)
OG0024853	wa8730.asm1v1.ann1.run1_008935	LBD42 LOB domain-containing protein 42 (Arabidopsis thaliana OX=3702)
OG0025058	wa8730.asm1v1.ann1.run1_010148	LBD6 LOB domain-containing protein 6 (Zea mays OX=4577)
OG0015059	wa8730.asm1v1.ann1.run1_001587	LEA6 Late embryogenesis abundant protein 6 (Arabidopsis thaliana OX=3702)
OG0025050	wa8730.asm1v1.ann1.run1_007952	LECRK91 L-type lectin-domain containing receptor kinase IX.1 (Arabidopsis thaliana OX=3702)
OG0024916	wa8730.asm1v1.ann1.run1_014113	Lectin (Fragment) (Allium cepa OX=4679)
OG0025094	wa8730.asm1v1.ann1.run1_003907	LHCB5 Chlorophyll a-b binding protein CP26, chloroplastic (Arabidopsis thaliana OX=3702)
OG0025131	wa8730.asm1v1.ann1.run1_012476	LNK1 Protein LNK1 (Arabidopsis thaliana OX=3702)
OG0016298	wa8730.asm1v1.ann1.run1_012108	MBR2 E3 ubiquitin-protein ligase MBR2 (Arabidopsis thaliana OX=3702)
OG0025133	wa8730.asm1v1.ann1.run1_009900	MRS2-4 Magnesium transporter MRS2-4 (Arabidopsis thaliana OX=3702)
OG0024941	wa8730.asm1v1.ann1.run1_011025	NAP1 Probable protein NAP1 (Oryza sativa subsp. japonica OX=39947)
OG0015039	wa8730.asm1v1.ann1.run1_004097	NCED1 9-cis-epoxycarotenoid dioxygenase NCED1, chloroplastic (Oryza sativa subsp. japonica OX=39947)
OG0015039	wa8730.asm1v1.ann1.run1_013054	NCED1 9-cis-epoxycarotenoid dioxygenase NCED1, chloroplastic (Oryza sativa subsp. japonica OX=39947)
OG0025118	wa8730.asm1v1.ann1.run1_001423	NCED2 9-cis-epoxycarotenoid dioxygenase NCED2, chloroplastic (Oryza sativa subsp. japonica OX=39947)
OG0015686	wa8730.asm1v1.ann1.run1_011599	NFYB4 Nuclear transcription factor Y subunit B-4 (Arabidopsis thaliana OX=3702)
OG0015686	wa8730.asm1v1.ann1.run1_014176	NFYB4 Nuclear transcription factor Y subunit B-4 (Arabidopsis thaliana OX=3702)
OG0025022	wa8730.asm1v1.ann1.run1_012554	NFYB4 Nuclear transcription factor Y subunit B-4 (Arabidopsis thaliana OX=3702)
OG0025056	wa8730.asm1v1.ann1.run1_013922	NFYB4 Nuclear transcription factor Y subunit B-4 (Arabidopsis thaliana OX=3702)
OG0015051	wa8730.asm1v1.ann1.run1_014053	NFYB6 Nuclear transcription factor Y subunit B-6 (Arabidopsis thaliana OX=3702)
OG0014153	wa8730.asm1v1.ann1.run1_003421	NFYC2 Nuclear transcription factor Y subunit C-2 (Arabidopsis thaliana OX=3702)
OG0015073	wa8730.asm1v1.ann1.run1_002140	NOI4 Protein NOI4 (Arabidopsis thaliana OX=3702)
OG0017191	wa8730.asm1v1.ann1.run1_007212	Os02g0491800 Putative germin-like protein 2-3 (Oryza sativa subsp. japonica OX=39947)
OG0017191	wa8730.asm1v1.ann1.run1_014014	Os02g0491800 Putative germin-like protein 2-3 (Oryza sativa subsp. japonica OX=39947)
OG0024997	wa8730.asm1v1.ann1.run1_013879	Os03g0429000 Cysteine proteinase inhibitor 8 (Oryza sativa subsp. japonica OX=39947)
OG0025065	wa8730.asm1v1.ann1.run1_005251	Os04g0282400 Flowering-promoting factor 1-like protein 4 (Oryza sativa subsp. japonica OX=39947)
OG0025004	wa8730.asm1v1.ann1.run1_013047	Os05g0428100 Beta-galactosidase 7 (Oryza sativa subsp. japonica OX=39947)
OG0019587	wa8730.asm1v1.ann1.run1_005291	PATL4 Patellin-4 (Arabidopsis thaliana OX=3702)
OG0019587	wa8730.asm1v1.ann1.run1_005293	PATL6 Patellin-6 (Arabidopsis thaliana OX=3702)
OG0024831	wa8730.asm1v1.ann1.run1_007780	PBL17 Probable serine/threonine-protein kinase PBL17 (Arabidopsis thaliana OX=3702)
OG0025054	wa8730.asm1v1.ann1.run1_001037	PCMP-E55 Pentatricopeptide repeat-containing protein At1g31430 (Arabidopsis thaliana OX=3702)
OG0017182	wa8730.asm1v1.ann1.run1_004738	PCMP-E68 Putative pentatricopeptide repeat-containing protein At1g74400 (Arabidopsis thaliana OX=3702)
OG0017182	wa8730.asm1v1.ann1.run1_009508	PCMP-E68 Putative pentatricopeptide repeat-containing protein At1g74400 (Arabidopsis thaliana OX=3702)
OG0024882	wa8730.asm1v1.ann1.run1_001339	PCMP-E86 Pentatricopeptide repeat-containing protein At3g53360, mitochondrial (Arabidopsis thaliana OX=3702)
OG0024906	wa8730.asm1v1.ann1.run1_005746	PCMP-H43 Pentatricopeptide repeat-containing protein At3g12770 (Arabidopsis thaliana OX=3702)
OG0025099	wa8730.asm1v1.ann1.run1_011047	PCMP-H84 Putative pentatricopeptide repeat-containing protein At3g08820 (Arabidopsis thaliana OX=3702)
OG0025129	wa8730.asm1v1.ann1.run1_014135	PER43 Peroxidase 43 (Arabidopsis thaliana OX=3702)
OG0024862	wa8730.asm1v1.ann1.run1_007410	PIN1 Peptidyl-prolyl cis-trans isomerase Pin1 (Malus domestica OX=3750)
OG0024911	wa8730.asm1v1.ann1.run1_009314	PP2C53 Protein phosphatase 2C 53 (Oryza sativa subsp. japonica OX=39947)
OG0019590	wa8730.asm1v1.ann1.run1_002698	PUB3 U-box domain-containing protein 3 (Arabidopsis thaliana OX=3702)
OG0025043	wa8730.asm1v1.ann1.run1_001241	RABA2A Ras-related protein RABA2a (Arabidopsis thaliana OX=3702)
OG0025020	wa8730.asm1v1.ann1.run1_009472	RABA5B Ras-related protein RABA5b (Arabidopsis thaliana OX=3702)
OG0012369	wa8730.asm1v1.ann1.run1_004037	REFA1 Elongation factor 1-alpha (Oryza sativa subsp. japonica OX=39947)
OG0012369	wa8730.asm1v1.ann1.run1_007389	REFA1 Elongation factor 1-alpha (Oryza sativa subsp. japonica OX=39947)
OG0012369	wa8730.asm1v1.ann1.run1_008435	REFA1 Elongation factor 1-alpha (Oryza sativa subsp. japonica OX=39947)
OG0012369	wa8730.asm1v1.ann1.run1_011434	REFA1 Elongation factor 1-alpha (Oryza sativa subsp. japonica OX=39947)
OG0024894	wa8730.asm1v1.ann1.run1_000963	Remorin (Solanum tuberosum OX=4113)
OG0024841	wa8730.asm1v1.ann1.run1_001402	RFT1 Protein RICE FLOWERING LOCUS T 1 (Oryza sativa subsp. japonica OX=39947)
OG0025000	wa8730.asm1v1.ann1.run1_004721	RPL27 60S ribosomal protein L27 (Solanum tuberosum OX=4113)
OG0025011	wa8730.asm1v1.ann1.run1_008367	RPL36C 60S ribosomal protein L36-3 (Arabidopsis thaliana OX=3702)
OG0025111	wa8730.asm1v1.ann1.run1_013580	RPS18A 40S ribosomal protein S18 (Arabidopsis thaliana OX=3702)
OG0024876	wa8730.asm1v1.ann1.run1_003874	RPS20B 40S ribosomal protein S20-2 (Arabidopsis thaliana OX=3702)
OG0024990	wa8730.asm1v1.ann1.run1_012832	RPS5 40S ribosomal protein S5 (Fragment) (Nicotiana plumbaginifolia OX=4092)
OG0024937	wa8730.asm1v1.ann1.run1_009562	RST1 Protein RST1 (Arabidopsis thaliana OX=3702)
OG0015685	wa8730.asm1v1.ann1.run1_000025	SAUR23 Auxin-responsive protein SAUR23 (Arabidopsis thaliana OX=3702)
OG0024934	wa8730.asm1v1.ann1.run1_000024	SAUR23 Auxin-responsive protein SAUR23 (Arabidopsis thaliana OX=3702)
OG0017184	wa8730.asm1v1.ann1.run1_012022	SAUR32 Auxin-responsive protein SAUR32 (Arabidopsis thaliana OX=3702)
OG0015685	wa8730.asm1v1.ann1.run1_000016	SAUR36 Auxin-responsive protein SAUR36 (Arabidopsis thaliana OX=3702)
OG0019602	wa8730.asm1v1.ann1.run1_000916	SBH1 Sphinganine C4-monooxygenase 1 (Arabidopsis thaliana OX=3702)
OG0017186	wa8730.asm1v1.ann1.run1_001848	SBH2 Sphinganine C4-monooxygenase 2 (Arabidopsis thaliana OX=3702)
OG0017186	wa8730.asm1v1.ann1.run1_001850	SBH2 Sphinganine C4-monooxygenase 2 (Arabidopsis thaliana OX=3702)
OG0024891	wa8730.asm1v1.ann1.run1_000188	SBH2 Sphinganine C4-monooxygenase 2 (Arabidopsis thaliana OX=3702)
OG0024967	wa8730.asm1v1.ann1.run1_010918	SBH2 Sphinganine C4-monooxygenase 2 (Arabidopsis thaliana OX=3702)
OG0025102	wa8730.asm1v1.ann1.run1_000917	SBH2 Sphinganine C4-monooxygenase 2 (Arabidopsis thaliana OX=3702)
OG0025103	wa8730.asm1v1.ann1.run1_000908	SBH2 Sphinganine C4-monooxygenase 2 (Arabidopsis thaliana OX=3702)
OG0024868	wa8730.asm1v1.ann1.run1_001345	SCPL19 Serine carboxypeptidase-like 19 (Arabidopsis thaliana OX=3702)
OG0024960	wa8730.asm1v1.ann1.run1_010048	STOP1 Protein SENSITIVE TO PROTON RHIZOTOXICITY 1 (Arabidopsis thaliana OX=3702)
OG0024830	wa8730.asm1v1.ann1.run1_009468	STR2 Thiosulfate/3-mercaptopyruvate sulfurtransferase 2 (Arabidopsis thaliana OX=3702)
OG0025125	wa8730.asm1v1.ann1.run1_006188	SUN1 SUN domain-containing protein 1 (Arabidopsis thaliana OX=3702)
OG0024837	wa8730.asm1v1.ann1.run1_002265	SWEET15 Bidirectional sugar transporter SWEET15 (Vitis vinifera OX=29760)
OG0024889	wa8730.asm1v1.ann1.run1_001856	TBL12 Protein trichome birefringence-like 12 (Arabidopsis thaliana OX=3702)
OG0012369	wa8730.asm1v1.ann1.run1_011509	TEF1 Elongation factor 1-alpha (Triticum aestivum OX=4565)
OG0025130	wa8730.asm1v1.ann1.run1_013604	TEF1 Elongation factor 1-alpha (Triticum aestivum OX=4565)
OG0024985	wa8730.asm1v1.ann1.run1_012917	TK Thymidine kinase (Oryza sativa subsp. japonica OX=39947)
OG0024926	wa8730.asm1v1.ann1.run1_004332	TPR2 Protein TPR2 (Oryza sativa subsp. japonica OX=39947)
OG0024875	wa8730.asm1v1.ann1.run1_002765	TPR3 Topless-related protein 3 (Arabidopsis thaliana OX=3702)
OG0024844	wa8730.asm1v1.ann1.run1_000585	UBP5 Ubiquitin carboxyl-terminal hydrolase 5 (Arabidopsis thaliana OX=3702)
OG0013768	wa8730.asm1v1.ann1.run1_008043	unknown function
OG0013768	wa8730.asm1v1.ann1.run1_008044	unknown function
OG0013768	wa8730.asm1v1.ann1.run1_013751	unknown function
OG0013768	wa8730.asm1v1.ann1.run1_013769	unknown function
OG0014543	wa8730.asm1v1.ann1.run1_004893	unknown function
OG0014543	wa8730.asm1v1.ann1.run1_008824	unknown function
OG0015078	wa8730.asm1v1.ann1.run1_000663	unknown function
OG0015683	wa8730.asm1v1.ann1.run1_011687	unknown function
OG0015683	wa8730.asm1v1.ann1.run1_013674	unknown function
OG0015683	wa8730.asm1v1.ann1.run1_013720	unknown function
OG0015687	wa8730.asm1v1.ann1.run1_005135	unknown function
OG0015687	wa8730.asm1v1.ann1.run1_012726	unknown function
OG0015687	wa8730.asm1v1.ann1.run1_013217	unknown function
OG0016295	wa8730.asm1v1.ann1.run1_012447	unknown function
OG0017181	wa8730.asm1v1.ann1.run1_002803	unknown function
OG0017181	wa8730.asm1v1.ann1.run1_007359	unknown function
OG0017183	wa8730.asm1v1.ann1.run1_003875	unknown function
OG0017183	wa8730.asm1v1.ann1.run1_012766	unknown function
OG0017184	wa8730.asm1v1.ann1.run1_013982	unknown function
OG0017187	wa8730.asm1v1.ann1.run1_007002	unknown function
OG0017188	wa8730.asm1v1.ann1.run1_004145	unknown function
OG0017188	wa8730.asm1v1.ann1.run1_013696	unknown function
OG0017188	wa8730.asm1v1.ann1.run1_014089	unknown function
OG0017189	wa8730.asm1v1.ann1.run1_013361	unknown function
OG0017189	wa8730.asm1v1.ann1.run1_013552	unknown function
OG0017973	wa8730.asm1v1.ann1.run1_007534	unknown function
OG0018002	wa8730.asm1v1.ann1.run1_005049	unknown function
OG0018018	wa8730.asm1v1.ann1.run1_010183	unknown function
OG0018037	wa8730.asm1v1.ann1.run1_008627	unknown function
OG0018045	wa8730.asm1v1.ann1.run1_003476	unknown function
OG0018052	wa8730.asm1v1.ann1.run1_013819	unknown function
OG0018054	wa8730.asm1v1.ann1.run1_002749	unknown function
OG0019589	wa8730.asm1v1.ann1.run1_010412	unknown function
OG0019599	wa8730.asm1v1.ann1.run1_013388	unknown function
OG0024832	wa8730.asm1v1.ann1.run1_006158	unknown function
OG0024836	wa8730.asm1v1.ann1.run1_005153	unknown function
OG0024839	wa8730.asm1v1.ann1.run1_004979	unknown function
OG0024840	wa8730.asm1v1.ann1.run1_008351	unknown function
OG0024842	wa8730.asm1v1.ann1.run1_005812	unknown function
OG0024845	wa8730.asm1v1.ann1.run1_011727	unknown function
OG0024847	wa8730.asm1v1.ann1.run1_011255	unknown function
OG0024855	wa8730.asm1v1.ann1.run1_012265	unknown function
OG0024856	wa8730.asm1v1.ann1.run1_002883	unknown function
OG0024857	wa8730.asm1v1.ann1.run1_010676	unknown function
OG0024861	wa8730.asm1v1.ann1.run1_010750	unknown function
OG0024864	wa8730.asm1v1.ann1.run1_007939	unknown function
OG0024865	wa8730.asm1v1.ann1.run1_006059	unknown function
OG0024866	wa8730.asm1v1.ann1.run1_013765	unknown function
OG0024867	wa8730.asm1v1.ann1.run1_008981	unknown function
OG0024869	wa8730.asm1v1.ann1.run1_011353	unknown function
OG0024870	wa8730.asm1v1.ann1.run1_011352	unknown function
OG0024871	wa8730.asm1v1.ann1.run1_006369	unknown function
OG0024874	wa8730.asm1v1.ann1.run1_001885	unknown function
OG0024877	wa8730.asm1v1.ann1.run1_011686	unknown function
OG0024880	wa8730.asm1v1.ann1.run1_001332	unknown function
OG0024883	wa8730.asm1v1.ann1.run1_008576	unknown function
OG0024884	wa8730.asm1v1.ann1.run1_012019	unknown function
OG0024886	wa8730.asm1v1.ann1.run1_006259	unknown function
OG0024887	wa8730.asm1v1.ann1.run1_000376	unknown function
OG0024888	wa8730.asm1v1.ann1.run1_002099	unknown function
OG0024890	wa8730.asm1v1.ann1.run1_000198	unknown function
OG0024892	wa8730.asm1v1.ann1.run1_004453	unknown function
OG0024895	wa8730.asm1v1.ann1.run1_005113	unknown function
OG0024898	wa8730.asm1v1.ann1.run1_006836	unknown function
OG0024899	wa8730.asm1v1.ann1.run1_013737	unknown function
OG0024901	wa8730.asm1v1.ann1.run1_006166	unknown function
OG0024902	wa8730.asm1v1.ann1.run1_013925	unknown function
OG0024903	wa8730.asm1v1.ann1.run1_012911	unknown function
OG0024904	wa8730.asm1v1.ann1.run1_008742	unknown function
OG0024905	wa8730.asm1v1.ann1.run1_006263	unknown function
OG0024907	wa8730.asm1v1.ann1.run1_003972	unknown function
OG0024913	wa8730.asm1v1.ann1.run1_001326	unknown function
OG0024914	wa8730.asm1v1.ann1.run1_003058	unknown function
OG0024915	wa8730.asm1v1.ann1.run1_004687	unknown function
OG0024917	wa8730.asm1v1.ann1.run1_005325	unknown function
OG0024918	wa8730.asm1v1.ann1.run1_006247	unknown function
OG0024919	wa8730.asm1v1.ann1.run1_004783	unknown function
OG0024920	wa8730.asm1v1.ann1.run1_009040	unknown function
OG0024921	wa8730.asm1v1.ann1.run1_010176	unknown function
OG0024923	wa8730.asm1v1.ann1.run1_001644	unknown function
OG0024927	wa8730.asm1v1.ann1.run1_011878	unknown function
OG0024928	wa8730.asm1v1.ann1.run1_009554	unknown function
OG0024930	wa8730.asm1v1.ann1.run1_006000	unknown function
OG0024931	wa8730.asm1v1.ann1.run1_011383	unknown function
OG0024933	wa8730.asm1v1.ann1.run1_000042	unknown function
OG0024936	wa8730.asm1v1.ann1.run1_013915	unknown function
OG0024938	wa8730.asm1v1.ann1.run1_007547	unknown function
OG0024939	wa8730.asm1v1.ann1.run1_005838	unknown function
OG0024942	wa8730.asm1v1.ann1.run1_006485	unknown function
OG0024943	wa8730.asm1v1.ann1.run1_002307	unknown function
OG0024944	wa8730.asm1v1.ann1.run1_003463	unknown function
OG0024945	wa8730.asm1v1.ann1.run1_007878	unknown function
OG0024946	wa8730.asm1v1.ann1.run1_009038	unknown function
OG0024947	wa8730.asm1v1.ann1.run1_000174	unknown function
OG0024948	wa8730.asm1v1.ann1.run1_006785	unknown function
OG0024950	wa8730.asm1v1.ann1.run1_012947	unknown function
OG0024952	wa8730.asm1v1.ann1.run1_004183	unknown function
OG0024953	wa8730.asm1v1.ann1.run1_004181	unknown function
OG0024954	wa8730.asm1v1.ann1.run1_003847	unknown function
OG0024955	wa8730.asm1v1.ann1.run1_003848	unknown function
OG0024956	wa8730.asm1v1.ann1.run1_003850	unknown function
OG0024957	wa8730.asm1v1.ann1.run1_003851	unknown function
OG0024958	wa8730.asm1v1.ann1.run1_000552	unknown function
OG0024959	wa8730.asm1v1.ann1.run1_000711	unknown function
OG0024961	wa8730.asm1v1.ann1.run1_012303	unknown function
OG0024962	wa8730.asm1v1.ann1.run1_012889	unknown function
OG0024963	wa8730.asm1v1.ann1.run1_001113	unknown function
OG0024964	wa8730.asm1v1.ann1.run1_011233	unknown function
OG0024965	wa8730.asm1v1.ann1.run1_006339	unknown function
OG0024966	wa8730.asm1v1.ann1.run1_013923	unknown function
OG0024968	wa8730.asm1v1.ann1.run1_000827	unknown function
OG0024969	wa8730.asm1v1.ann1.run1_006950	unknown function
OG0024970	wa8730.asm1v1.ann1.run1_006681	unknown function
OG0024971	wa8730.asm1v1.ann1.run1_008172	unknown function
OG0024972	wa8730.asm1v1.ann1.run1_002642	unknown function
OG0024973	wa8730.asm1v1.ann1.run1_004143	unknown function
OG0024974	wa8730.asm1v1.ann1.run1_004131	unknown function
OG0024975	wa8730.asm1v1.ann1.run1_009676	unknown function
OG0024976	wa8730.asm1v1.ann1.run1_001080	unknown function
OG0024977	wa8730.asm1v1.ann1.run1_008241	unknown function
OG0024978	wa8730.asm1v1.ann1.run1_013841	unknown function
OG0024981	wa8730.asm1v1.ann1.run1_011659	unknown function
OG0024983	wa8730.asm1v1.ann1.run1_007934	unknown function
OG0024984	wa8730.asm1v1.ann1.run1_012944	unknown function
OG0024987	wa8730.asm1v1.ann1.run1_007314	unknown function
OG0024991	wa8730.asm1v1.ann1.run1_009009	unknown function
OG0024992	wa8730.asm1v1.ann1.run1_009007	unknown function
OG0024993	wa8730.asm1v1.ann1.run1_001764	unknown function
OG0024994	wa8730.asm1v1.ann1.run1_009568	unknown function
OG0024995	wa8730.asm1v1.ann1.run1_013383	unknown function
OG0024996	wa8730.asm1v1.ann1.run1_013382	unknown function
OG0024998	wa8730.asm1v1.ann1.run1_013897	unknown function
OG0025002	wa8730.asm1v1.ann1.run1_006084	unknown function
OG0025003	wa8730.asm1v1.ann1.run1_005313	unknown function
OG0025005	wa8730.asm1v1.ann1.run1_005768	unknown function
OG0025006	wa8730.asm1v1.ann1.run1_000673	unknown function
OG0025007	wa8730.asm1v1.ann1.run1_013241	unknown function
OG0025008	wa8730.asm1v1.ann1.run1_012739	unknown function
OG0025009	wa8730.asm1v1.ann1.run1_002813	unknown function
OG0025012	wa8730.asm1v1.ann1.run1_004189	unknown function
OG0025013	wa8730.asm1v1.ann1.run1_012787	unknown function
OG0025014	wa8730.asm1v1.ann1.run1_009731	unknown function
OG0025015	wa8730.asm1v1.ann1.run1_014000	unknown function
OG0025016	wa8730.asm1v1.ann1.run1_001523	unknown function
OG0025017	wa8730.asm1v1.ann1.run1_004706	unknown function
OG0025021	wa8730.asm1v1.ann1.run1_003300	unknown function
OG0025024	wa8730.asm1v1.ann1.run1_004896	unknown function
OG0025025	wa8730.asm1v1.ann1.run1_004250	unknown function
OG0025026	wa8730.asm1v1.ann1.run1_006104	unknown function
OG0025028	wa8730.asm1v1.ann1.run1_010333	unknown function
OG0025030	wa8730.asm1v1.ann1.run1_010331	unknown function
OG0025031	wa8730.asm1v1.ann1.run1_010317	unknown function
OG0025032	wa8730.asm1v1.ann1.run1_011009	unknown function
OG0025035	wa8730.asm1v1.ann1.run1_008810	unknown function
OG0025037	wa8730.asm1v1.ann1.run1_002921	unknown function
OG0025039	wa8730.asm1v1.ann1.run1_004821	unknown function
OG0025040	wa8730.asm1v1.ann1.run1_003627	unknown function
OG0025041	wa8730.asm1v1.ann1.run1_000117	unknown function
OG0025047	wa8730.asm1v1.ann1.run1_002661	unknown function
OG0025048	wa8730.asm1v1.ann1.run1_004911	unknown function
OG0025049	wa8730.asm1v1.ann1.run1_007953	unknown function
OG0025051	wa8730.asm1v1.ann1.run1_003158	unknown function
OG0025052	wa8730.asm1v1.ann1.run1_011035	unknown function
OG0025053	wa8730.asm1v1.ann1.run1_001993	unknown function
OG0025055	wa8730.asm1v1.ann1.run1_001043	unknown function
OG0025059	wa8730.asm1v1.ann1.run1_014007	unknown function
OG0025060	wa8730.asm1v1.ann1.run1_013325	unknown function
OG0025062	wa8730.asm1v1.ann1.run1_011592	unknown function
OG0025063	wa8730.asm1v1.ann1.run1_007290	unknown function
OG0025064	wa8730.asm1v1.ann1.run1_007292	unknown function
OG0025066	wa8730.asm1v1.ann1.run1_002566	unknown function
OG0025067	wa8730.asm1v1.ann1.run1_008689	unknown function
OG0025068	wa8730.asm1v1.ann1.run1_013405	unknown function
OG0025070	wa8730.asm1v1.ann1.run1_006817	unknown function
OG0025071	wa8730.asm1v1.ann1.run1_004642	unknown function
OG0025072	wa8730.asm1v1.ann1.run1_004875	unknown function
OG0025073	wa8730.asm1v1.ann1.run1_002059	unknown function
OG0025074	wa8730.asm1v1.ann1.run1_003898	unknown function
OG0025075	wa8730.asm1v1.ann1.run1_006610	unknown function
OG0025077	wa8730.asm1v1.ann1.run1_010310	unknown function
OG0025078	wa8730.asm1v1.ann1.run1_012049	unknown function
OG0025079	wa8730.asm1v1.ann1.run1_000178	unknown function
OG0025082	wa8730.asm1v1.ann1.run1_000783	unknown function
OG0025083	wa8730.asm1v1.ann1.run1_003436	unknown function
OG0025084	wa8730.asm1v1.ann1.run1_008233	unknown function
OG0025085	wa8730.asm1v1.ann1.run1_008520	unknown function
OG0025087	wa8730.asm1v1.ann1.run1_003172	unknown function
OG0025088	wa8730.asm1v1.ann1.run1_002737	unknown function
OG0025090	wa8730.asm1v1.ann1.run1_012152	unknown function
OG0025091	wa8730.asm1v1.ann1.run1_007075	unknown function
OG0025092	wa8730.asm1v1.ann1.run1_005037	unknown function
OG0025093	wa8730.asm1v1.ann1.run1_012139	unknown function
OG0025095	wa8730.asm1v1.ann1.run1_001686	unknown function
OG0025096	wa8730.asm1v1.ann1.run1_013344	unknown function
OG0025097	wa8730.asm1v1.ann1.run1_009510	unknown function
OG0025100	wa8730.asm1v1.ann1.run1_008895	unknown function
OG0025101	wa8730.asm1v1.ann1.run1_009428	unknown function
OG0025104	wa8730.asm1v1.ann1.run1_001601	unknown function
OG0025105	wa8730.asm1v1.ann1.run1_001604	unknown function
OG0025106	wa8730.asm1v1.ann1.run1_005478	unknown function
OG0025107	wa8730.asm1v1.ann1.run1_012616	unknown function
OG0025108	wa8730.asm1v1.ann1.run1_012462	unknown function
OG0025115	wa8730.asm1v1.ann1.run1_012125	unknown function
OG0025116	wa8730.asm1v1.ann1.run1_005318	unknown function
OG0025120	wa8730.asm1v1.ann1.run1_002253	unknown function
OG0025121	wa8730.asm1v1.ann1.run1_003544	unknown function
OG0025122	wa8730.asm1v1.ann1.run1_006323	unknown function
OG0025123	wa8730.asm1v1.ann1.run1_013524	unknown function
OG0025126	wa8730.asm1v1.ann1.run1_006187	unknown function
OG0025127	wa8730.asm1v1.ann1.run1_013101	unknown function
OG0025128	wa8730.asm1v1.ann1.run1_012631	unknown function
OG0025132	wa8730.asm1v1.ann1.run1_002628	unknown function
OG0025135	wa8730.asm1v1.ann1.run1_010901	unknown function
OG0025136	wa8730.asm1v1.ann1.run1_004928	unknown function
OG0025138	wa8730.asm1v1.ann1.run1_000690	unknown function
OG0025139	wa8730.asm1v1.ann1.run1_010341	unknown function
OG0025140	wa8730.asm1v1.ann1.run1_003841	unknown function
OG0025141	wa8730.asm1v1.ann1.run1_013773	unknown function
OG0025142	wa8730.asm1v1.ann1.run1_005221	unknown function
OG0024949	wa8730.asm1v1.ann1.run1_011979	VPS26A Vacuolar protein sorting-associated protein 26A (Arabidopsis thaliana OX=3702)
OG0025033	wa8730.asm1v1.ann1.run1_004103	WAK1 Wall-associated receptor kinase 1 (Arabidopsis thaliana OX=3702)
OG0025076	wa8730.asm1v1.ann1.run1_006612	WRKY19 Probable WRKY transcription factor 19 (Arabidopsis thaliana OX=3702)
OG0024924	wa8730.asm1v1.ann1.run1_009131	WRKY58 Probable WRKY transcription factor 58 (Arabidopsis thaliana OX=3702)
OG0019599	wa8730.asm1v1.ann1.run1_013387	WSD1 O-acyltransferase WSD1 (Arabidopsis thaliana OX=3702)
OG0024910	wa8730.asm1v1.ann1.run1_007882	WSD1 O-acyltransferase WSD1 (Arabidopsis thaliana OX=3702)
OG0024925	wa8730.asm1v1.ann1.run1_013242	WSD1 O-acyltransferase WSD1 (Arabidopsis thaliana OX=3702)
OG0025001	wa8730.asm1v1.ann1.run1_001429	XERO1 Dehydrin Xero 1 (Arabidopsis thaliana OX=3702)

## Sheet: Supplemental_Table_S10
Supplemental Table S10. Arabidopsis gene IDs, annotation and orthogroups (OGs) for genes missing in Wolffia.
OG	geneID	Annotation
OG0000020	AT1G43760	DNAse I-like superfamily protein
OG0000020	ATMG01250	ORF102__RNA-directed DNA polymerase (reverse transcriptase)
OG0000023	AT3G14460	LRR and NB-ARC domains-containing disease resistance protein
OG0000023	AT3G14470	NB-ARC domain-containing disease resistance protein
OG0000031	AT1G10920	LOV1__NB-ARC domain-containing disease resistance protein
OG0000031	AT1G50180	NB-ARC domain-containing disease resistance protein
OG0000031	AT1G53350	Disease resistance protein (CC-NBS-LRR class) family
OG0000031	AT1G58390	Disease resistance protein (CC-NBS-LRR class) family
OG0000031	AT1G58400	Disease resistance protein (CC-NBS-LRR class) family
OG0000031	AT1G58410	Disease resistance protein (CC-NBS-LRR class) family
OG0000031	AT1G58602	LRR and NB-ARC domains-containing disease resistance protein
OG0000031	AT1G58807	Disease resistance protein (CC-NBS-LRR class) family
OG0000031	AT1G58848	Disease resistance protein (CC-NBS-LRR class) family
OG0000031	AT1G59124	Disease resistance protein (CC-NBS-LRR class) family
OG0000031	AT1G59218	Disease resistance protein (CC-NBS-LRR class) family
OG0000031	AT1G59780	NB-ARC domain-containing disease resistance protein
OG0000031	AT3G07040	RPM1_RPS3__NB-ARC domain-containing disease resistance protein
OG0000031	AT3G46530	RPP13__NB-ARC domain-containing disease resistance protein
OG0000031	AT3G46710	NB-ARC domain-containing disease resistance protein
OG0000031	AT3G46730	NB-ARC domain-containing disease resistance protein
OG0000031	AT4G16095	RNI-like superfamily protein
OG0000031	AT5G35450	Disease resistance protein (CC-NBS-LRR class) family
OG0000031	AT5G43470	HRT_RCY1_RPP8__Disease resistance protein (CC-NBS-LRR class) family
OG0000031	AT5G48620	Disease resistance protein (CC-NBS-LRR class) family
OG0000057	AT1G36005
OG0000057	AT1G66910	Protein kinase superfamily protein
OG0000057	AT1G66920	Protein kinase superfamily protein
OG0000057	AT1G66930	LRK10L2__Protein kinase superfamily protein
OG0000057	AT1G67000	Protein kinase superfamily protein
OG0000057	AT1G70250	receptor serine/threonine kinase, putative
OG0000057	AT4G18250	receptor serine/threonine kinase, putative
OG0000057	AT5G38240	Protein kinase family protein
OG0000057	AT5G38250	Protein kinase family protein
OG0000057	AT5G38260	Protein kinase superfamily protein
OG0000057	AT5G38280	PR5K__PR5-like receptor kinase
OG0000057	AT5G39020	Malectin/receptor-like protein kinase family protein
OG0000057	AT5G39030	Protein kinase superfamily protein
OG0000058	AT1G47885	Ribonuclease inhibitor
OG0000058	AT2G34930	disease resistance family protein / LRR family protein
OG0000073	AT1G31950	Terpenoid cyclases/Protein prenyltransferases superfamily protein
OG0000073	AT1G33750	TPS22__Terpenoid cyclases/Protein prenyltransferases superfamily protein
OG0000073	AT1G48800	Terpenoid cyclases/Protein prenyltransferases superfamily protein
OG0000073	AT1G48820	Terpenoid cyclases/Protein prenyltransferases superfamily protein
OG0000073	AT1G66020	TPS26__Terpenoid cyclases/Protein prenyltransferases superfamily protein
OG0000073	AT1G70080	TPS6__Terpenoid cyclases/Protein prenyltransferases superfamily protein
OG0000073	AT2G24210	TPS10__terpene synthase 10
OG0000073	AT3G14490	Terpenoid cyclases/Protein prenyltransferases superfamily protein
OG0000073	AT3G14520	AtsesterTPS1_AtTPS18_TPS18__Terpenoid cyclases/Protein prenyltransferases superfamily protein
OG0000073	AT3G14540	AtsesterTPS2_AtTPS19_TPS19__Terpenoid cyclases/Protein prenyltransferases superfamily protein
OG0000073	AT3G25810	Terpenoid cyclases/Protein prenyltransferases superfamily protein
OG0000073	AT3G25820	ATTPS-CIN_TPS-CIN_TPS23__terpene synthase-like sequence-1,8-cineole
OG0000073	AT3G25830	ATTPS-CIN_TPS-CIN_TPS-CIN_TPS27__terpene synthase-like sequence-1,8-cineole
OG0000073	AT3G29110	Terpenoid cyclases/Protein prenyltransferases superfamily protein
OG0000073	AT3G29190	Terpenoid cyclases/Protein prenyltransferases superfamily protein
OG0000073	AT3G29410	TPS25__Terpenoid cyclases/Protein prenyltransferases superfamily protein
OG0000073	AT3G32030	TPS9__Terpenoid cyclases/Protein prenyltransferases superfamily protein
OG0000073	AT4G13280	ATTPS12_TPS12__terpenoid synthase 12
OG0000073	AT4G13300	ATTPS13_TPS13__terpenoid synthase 13
OG0000073	AT4G15870	ATTS1_TS1__terpene synthase 1
OG0000073	AT4G16730	TPS02_TPS02-Ws__terpene synthase 02
OG0000073	AT4G16740	ATTPS03_TPS03__terpene synthase 03
OG0000073	AT4G20200	Terpenoid cyclases/Protein prenyltransferases superfamily protein
OG0000073	AT4G20210	TPS08__Terpenoid cyclases/Protein prenyltransferases superfamily protein
OG0000073	AT4G20230	TPS30__Terpenoid cyclases/Protein prenyltransferases superfamily protein
OG0000073	AT5G23960	ATTPS21_TPS21__terpene synthase 21
OG0000073	AT5G44630	Terpenoid cyclases/Protein prenyltransferases superfamily protein
OG0000073	AT5G48110	TPS20__Terpenoid cyclases/Protein prenyltransferases superfamily protein
OG0000093	AT1G17600	SOC3__Disease resistance protein (TIR-NBS-LRR class) family
OG0000093	AT1G27170	transmembrane receptors;ATP binding
OG0000093	AT1G27180	disease resistance protein (TIR-NBS-LRR class), putative
OG0000093	AT1G31540	Disease resistance protein (TIR-NBS-LRR class) family
OG0000093	AT1G56510	ADR2_WRR4__Disease resistance protein (TIR-NBS-LRR class)
OG0000093	AT1G56520	Disease resistance protein (TIR-NBS-LRR class) family
OG0000093	AT1G56540	Disease resistance protein (TIR-NBS-LRR class) family
OG0000093	AT1G63730	Disease resistance protein (TIR-NBS-LRR class) family
OG0000093	AT1G63740	Disease resistance protein (TIR-NBS-LRR class) family
OG0000093	AT1G63750	Disease resistance protein (TIR-NBS-LRR class) family
OG0000093	AT1G63860	Disease resistance protein (TIR-NBS-LRR class) family
OG0000093	AT1G63870	Disease resistance protein (TIR-NBS-LRR class) family
OG0000093	AT1G63880	Disease resistance protein (TIR-NBS-LRR class) family
OG0000093	AT1G64070	RLM1__Disease resistance protein (TIR-NBS-LRR class) family
OG0000093	AT1G65850	Disease resistance protein (TIR-NBS-LRR class) family
OG0000093	AT1G66090	Disease resistance protein (TIR-NBS class)
OG0000093	AT1G69550	disease resistance protein (TIR-NBS-LRR class)
OG0000093	AT1G72840	Disease resistance protein (TIR-NBS-LRR class)
OG0000093	AT1G72860	Disease resistance protein (TIR-NBS-LRR class) family
OG0000093	AT2G14080	Disease resistance protein (TIR-NBS-LRR class) family
OG0000093	AT2G16870	Disease resistance protein (TIR-NBS-LRR class) family
OG0000093	AT2G17060	Disease resistance protein (TIR-NBS-LRR class) family
OG0000093	AT3G04210	TN13__Disease resistance protein (TIR-NBS class)
OG0000093	AT3G04220	Disease resistance protein (TIR-NBS-LRR class) family
OG0000093	AT3G44400	Disease resistance protein (TIR-NBS-LRR class) family
OG0000093	AT3G44480	cog1_RPP1__Disease resistance protein (TIR-NBS-LRR class) family
OG0000093	AT3G44630	Disease resistance protein (TIR-NBS-LRR class) family
OG0000093	AT3G44670	DM2h__Disease resistance protein (TIR-NBS-LRR class) family
OG0000093	AT3G51570	Disease resistance protein (TIR-NBS-LRR class) family
OG0000093	AT4G08450	Disease resistance protein (TIR-NBS-LRR class) family
OG0000093	AT4G09360	NB-ARC domain-containing disease resistance protein
OG0000093	AT4G09430	Disease resistance protein (TIR-NBS-LRR class) family
OG0000093	AT4G09435
OG0000093	AT4G11170	RMG1__Disease resistance protein (TIR-NBS-LRR class) family
OG0000093	AT4G12010	DSC1__Disease resistance protein (TIR-NBS-LRR class) family
OG0000093	AT4G14370	Disease resistance protein (TIR-NBS-LRR class) family
OG0000093	AT4G16860	RPP4__Disease resistance protein (TIR-NBS-LRR class) family
OG0000093	AT4G16890	BAL_SNC1__disease resistance protein (TIR-NBS-LRR class), putative
OG0000093	AT4G16900	Disease resistance protein (TIR-NBS-LRR class) family
OG0000093	AT4G16920	Disease resistance protein (TIR-NBS-LRR class) family
OG0000093	AT4G16940	Disease resistance protein (TIR-NBS-LRR class) family
OG0000093	AT4G16950	RPP5__Disease resistance protein (TIR-NBS-LRR class) family
OG0000093	AT4G19470	Leucine-rich repeat (LRR) family protein
OG0000093	AT4G19500	nucleoside-triphosphatases;transmembrane receptors;nucleotide binding;ATP binding
OG0000093	AT4G19510	Disease resistance protein (TIR-NBS-LRR class)
OG0000093	AT4G19530	disease resistance protein (TIR-NBS-LRR class) family
OG0000093	AT4G36140	disease resistance protein (TIR-NBS-LRR class), putative
OG0000093	AT4G36150	Disease resistance protein (TIR-NBS-LRR class) family
OG0000093	AT5G11250	BURNOUT1__Disease resistance protein (TIR-NBS-LRR class)
OG0000093	AT5G17680	disease resistance protein (TIR-NBS-LRR class), putative
OG0000093	AT5G17880	CSA1__disease resistance protein (TIR-NBS-LRR class)
OG0000093	AT5G17970	Disease resistance protein (TIR-NBS-LRR class) family
OG0000093	AT5G18350	Disease resistance protein (TIR-NBS-LRR class) family
OG0000093	AT5G18360	Disease resistance protein (TIR-NBS-LRR class) family
OG0000093	AT5G18370	DSC2__Disease resistance protein (TIR-NBS-LRR class) family
OG0000093	AT5G22690	Disease resistance protein (TIR-NBS-LRR class) family
OG0000093	AT5G36930	Disease resistance protein (TIR-NBS-LRR class) family
OG0000093	AT5G38340	Disease resistance protein (TIR-NBS-LRR class) family
OG0000093	AT5G38350	Disease resistance protein (NBS-LRR class) family
OG0000093	AT5G38850	Disease resistance protein (TIR-NBS-LRR class)
OG0000093	AT5G40060	Disease resistance protein (NBS-LRR class) family
OG0000093	AT5G40100	Disease resistance protein (TIR-NBS-LRR class) family
OG0000093	AT5G40910	Disease resistance protein (TIR-NBS-LRR class) family
OG0000093	AT5G41540	Disease resistance protein (TIR-NBS-LRR class) family
OG0000093	AT5G41550	Disease resistance protein (TIR-NBS-LRR class) family
OG0000093	AT5G41740	Disease resistance protein (TIR-NBS-LRR class) family
OG0000093	AT5G41750	Disease resistance protein (TIR-NBS-LRR class) family
OG0000093	AT5G44510	TAO1__target of AVRB operation1
OG0000093	AT5G44870	LAZ5_TTR1__Disease resistance protein (TIR-NBS-LRR class) family
OG0000093	AT5G45060	Disease resistance protein (TIR-NBS-LRR class) family
OG0000093	AT5G45200	Disease resistance protein (TIR-NBS-LRR class) family
OG0000093	AT5G45230	Disease resistance protein (TIR-NBS-LRR class) family
OG0000093	AT5G45250	RPS4__Disease resistance protein (TIR-NBS-LRR class) family
OG0000093	AT5G45260	ATWRKY52_RRS1_RRS1-R_SLH1__Disease resistance protein (TIR-NBS-LRR class)
OG0000093	AT5G46260	disease resistance protein (TIR-NBS-LRR class) family
OG0000093	AT5G46270	Disease resistance protein (TIR-NBS-LRR class) family
OG0000093	AT5G46450	Disease resistance protein (TIR-NBS-LRR class) family
OG0000093	AT5G46470	RPS6__disease resistance protein (TIR-NBS-LRR class) family
OG0000093	AT5G46510	VICTL__Disease resistance protein (TIR-NBS-LRR class) family
OG0000093	AT5G46520	ACQOS_VICTR__Disease resistance protein (TIR-NBS-LRR class) family
OG0000093	AT5G48770	Disease resistance protein (TIR-NBS-LRR class) family
OG0000093	AT5G49140	Disease resistance protein (TIR-NBS-LRR class) family
OG0000093	AT5G51630	Disease resistance protein (TIR-NBS-LRR class) family
OG0000093	AT5G58120	Disease resistance protein (TIR-NBS-LRR class) family
OG0000098	AT1G15125	S-adenosyl-L-methionine-dependent methyltransferases superfamily protein
OG0000098	AT1G19640	JMT__jasmonic acid carboxyl methyltransferase
OG0000098	AT1G66690	S-adenosyl-L-methionine-dependent methyltransferases superfamily protein
OG0000098	AT1G66700	PXMT1__S-adenosyl-L-methionine-dependent methyltransferases superfamily protein
OG0000098	AT1G66720	S-adenosyl-L-methionine-dependent methyltransferases superfamily protein
OG0000098	AT1G68040	S-adenosyl-L-methionine-dependent methyltransferases superfamily protein
OG0000098	AT2G14060	S-adenosyl-L-methionine-dependent methyltransferases superfamily protein
OG0000098	AT3G11480	ATBSMT1_BSMT1__S-adenosyl-L-methionine-dependent methyltransferases superfamily protein
OG0000098	AT3G21950	S-adenosyl-L-methionine-dependent methyltransferases superfamily protein
OG0000098	AT3G44840	S-adenosyl-L-methionine-dependent methyltransferases superfamily protein
OG0000098	AT3G44860	FAMT__farnesoic acid carboxyl-O-methyltransferase
OG0000098	AT3G44870	S-adenosyl-L-methionine-dependent methyltransferases superfamily protein
OG0000098	AT4G26420	AtGAMT1_GAMT1__S-adenosyl-L-methionine-dependent methyltransferases superfamily protein
OG0000098	AT4G26460	S-adenosyl-L-methionine-dependent methyltransferases superfamily protein
OG0000098	AT4G36470	S-adenosyl-L-methionine-dependent methyltransferases superfamily protein
OG0000098	AT5G04370	NAMT1__S-adenosyl-L-methionine-dependent methyltransferases superfamily protein
OG0000098	AT5G04380	S-adenosyl-L-methionine-dependent methyltransferases superfamily protein
OG0000098	AT5G37970	S-adenosyl-L-methionine-dependent methyltransferases superfamily protein
OG0000098	AT5G37990	CIMT1__S-adenosyl-L-methionine-dependent methyltransferases superfamily protein
OG0000098	AT5G38020	S-adenosyl-L-methionine-dependent methyltransferases superfamily protein
OG0000098	AT5G38100	S-adenosyl-L-methionine-dependent methyltransferases superfamily protein
OG0000098	AT5G38780	S-adenosyl-L-methionine-dependent methyltransferases superfamily protein
OG0000098	AT5G55250	AtIAMT1_IAMT1__IAA carboxylmethyltransferase 1
OG0000098	AT5G56300	GAMT2__gibberellic acid methyltransferase 2
OG0000098	AT5G66430	S-adenosyl-L-methionine-dependent methyltransferases superfamily protein
OG0000121	AT1G13420	ATST4B_ST4B__sulfotransferase 4B
OG0000121	AT1G13430	ATST4C_ST4C__sulfotransferase 4C
OG0000121	AT1G18590	ATSOT17_ATST5C_SOT17__sulfotransferase 17
OG0000121	AT1G28170	SOT7__sulphotransferase 7
OG0000121	AT1G74090	ATSOT18_ATST5B_SOT18__desulfo-glucosinolate sulfotransferase 18
OG0000121	AT1G74100	ATSOT16_ATST5A_CORI-7_SOT16__sulfotransferase 16
OG0000121	AT2G03750	P-loop containing nucleoside triphosphate hydrolases superfamily protein
OG0000121	AT2G03760	AtSOT1_AtSOT12_ATST1_AtSULT202A1_RAR047_SOT12_ST_ST1_SULT202A1__sulphotransferase 12
OG0000121	AT2G03770	AtSULT202E1_SULT202E1__P-loop containing nucleoside triphosphate hydrolases superfamily protein
OG0000121	AT2G14920	ATST4A_ST4A__sulfotransferase 4A
OG0000121	AT2G27570	P-loop containing nucleoside triphosphate hydrolases superfamily protein
OG0000121	AT3G45070	AtSULT202B1_SULT202B1__P-loop containing nucleoside triphosphate hydrolases superfamily protein
OG0000121	AT3G45080	P-loop containing nucleoside triphosphate hydrolases superfamily protein
OG0000121	AT3G51210	P-loop containing nucleoside triphosphate hydrolases superfamily protein
OG0000121	AT4G26280	P-loop containing nucleoside triphosphate hydrolases superfamily protein
OG0000121	AT5G07000	ATST2B_ST2B__sulfotransferase 2B
OG0000121	AT5G07010	ATST2A_ST2A__sulfotransferase 2A
OG0000121	AT5G43690	P-loop containing nucleoside triphosphate hydrolases superfamily protein
OG0000122	AT1G01980	AtBBE1__FAD-binding Berberine family protein
OG0000122	AT1G11770	AtBBE2__FAD-binding Berberine family protein
OG0000122	AT1G26380	AtBBE3_FOX_FOX1__FAD-binding Berberine family protein
OG0000122	AT1G26390	AtBBE4__FAD-binding Berberine family protein
OG0000122	AT1G26400	AtBBE5__FAD-binding Berberine family protein
OG0000122	AT1G26410	AtBBE6__FAD-binding Berberine family protein
OG0000122	AT1G26420	AtBBE7__FAD-binding Berberine family protein
OG0000122	AT1G30700	AtBBE8__FAD-binding Berberine family protein
OG0000122	AT1G30710	AtBBE9__FAD-binding Berberine family protein
OG0000122	AT1G30720	AtBBE10__FAD-binding Berberine family protein
OG0000122	AT1G30730	AtBBE11__FAD-binding Berberine family protein
OG0000122	AT1G30740	AtBBE12__FAD-binding Berberine family protein
OG0000122	AT1G30760	AtBBE-like 13__FAD-binding Berberine family protein
OG0000122	AT1G34575	AtBBE14__FAD-binding Berberine family protein
OG0000122	AT2G34790	AtBBE-like 15_EDA28_MEE23__FAD-binding Berberine family protein
OG0000122	AT2G34810	AtBBE16__FAD-binding Berberine family protein
OG0000122	AT4G20800	AtBBE17__FAD-binding Berberine family protein
OG0000122	AT4G20820	AtBBE18__FAD-binding Berberine family protein
OG0000122	AT4G20830	AtBBE19_AtBBE20__FAD-binding Berberine family protein
OG0000122	AT4G20840	AtBBE21__FAD-binding Berberine family protein
OG0000122	AT4G20860	AtBBE22__FAD-binding Berberine family protein
OG0000122	AT5G44360	AtBBE23__FAD-binding Berberine family protein
OG0000122	AT5G44380	AtBBE28__FAD-binding Berberine family protein
OG0000122	AT5G44390	AtBBE25__FAD-binding Berberine family protein
OG0000122	AT5G44400	AtBBE26__FAD-binding Berberine family protein
OG0000122	AT5G44410	AtBBE27__FAD-binding Berberine family protein
OG0000122	AT5G44440	FAD-binding Berberine family protein
OG0000131	ATMG00850	ORF107E__DNA/RNA polymerases superfamily protein
OG0000131	ATMG00860	ORF158__DNA/RNA polymerases superfamily protein
OG0000137	AT1G03670	ankyrin repeat family protein
OG0000137	AT4G03440	Ankyrin repeat family protein
OG0000137	AT4G03450	Ankyrin repeat family protein
OG0000137	AT4G03470	Ankyrin repeat family protein
OG0000137	AT4G03480	Ankyrin repeat family protein
OG0000137	AT4G03490	Ankyrin repeat family protein
OG0000137	AT4G03495
OG0000137	AT4G03500	Ankyrin repeat family protein
OG0000137	AT4G03505
OG0000137	AT4G05040	ankyrin repeat family protein
OG0000137	AT4G14390	Ankyrin repeat family protein
OG0000137	AT4G14400	ACD6__ankyrin repeat family protein
OG0000137	AT5G54720	Ankyrin repeat family protein
OG0000142	AT1G40390	DNAse I-like superfamily protein
OG0000153	AT1G49610	F-box family protein
OG0000153	AT2G39415	F-box family protein
OG0000153	AT3G56780	FBD, F-box and Leucine Rich Repeat domains containing protein
OG0000153	AT3G60710	F-box family protein
OG0000153	AT5G02920	F-box/RNI-like superfamily protein
OG0000211	AT1G29420	SAUR61__SAUR-like auxin-responsive protein family
OG0000211	AT1G29430	SAUR62__SAUR-like auxin-responsive protein family
OG0000211	AT1G29440	SAUR63__SAUR-like auxin-responsive protein family
OG0000211	AT1G29450	SAUR64__SAUR-like auxin-responsive protein family
OG0000211	AT1G29460	SAUR65__SAUR-like auxin-responsive protein family
OG0000211	AT1G29490	SAUR68__SAUR-like auxin-responsive protein family
OG0000211	AT1G29500	SAUR66__SAUR-like auxin-responsive protein family
OG0000211	AT1G29510	SAUR67__SAUR-like auxin-responsive protein family
OG0000211	AT1G76190	SAUR56__SAUR-like auxin-responsive protein family
OG0000211	AT5G27780	SAUR75__SAUR-like auxin-responsive protein family
OG0000212	AT1G80960	F-box and Leucine Rich Repeat domains containing protein
OG0000212	AT3G43415
OG0000239	AT3G13950
OG0000239	AT4G11000	Ankyrin repeat family protein
OG0000239	AT4G13266
OG0000248	AT1G17010	2-oxoglutarate (2OG) and Fe(II)-dependent oxygenase superfamily protein
OG0000248	AT1G17020	ATSRG1_SRG1__senescence-related gene 1
OG0000248	AT1G78550	2-oxoglutarate (2OG) and Fe(II)-dependent oxygenase superfamily protein
OG0000248	AT3G21420	LBO1__2-oxoglutarate (2OG) and Fe(II)-dependent oxygenase superfamily protein
OG0000248	AT4G25300	2-oxoglutarate (2OG) and Fe(II)-dependent oxygenase superfamily protein
OG0000248	AT4G25310	2-oxoglutarate (2OG) and Fe(II)-dependent oxygenase superfamily protein
OG0000251	AT1G47695
OG0000273	AT1G52030	F-ATMBP_MBP1.2_MBP2__myrosinase-binding protein 2
OG0000273	AT1G52060	Mannose-binding lectin superfamily protein
OG0000273	AT1G52070	Mannose-binding lectin superfamily protein
OG0000273	AT1G60110	Mannose-binding lectin superfamily protein
OG0000273	AT1G60130	Mannose-binding lectin superfamily protein
OG0000273	AT3G16470	AtJAC1_JAL35_JR1__Mannose-binding lectin superfamily protein
OG0000273	AT5G28520	Mannose-binding lectin superfamily protein
OG0000273	AT5G49860	Mannose-binding lectin superfamily protein
OG0000282	AT1G66540	Cytochrome P450 superfamily protein
OG0000282	AT2G23190	CYP81D7__cytochrome P450, family 81, subfamily D, polypeptide 7
OG0000282	AT2G23220	CYP81D6__cytochrome P450, family 81, subfamily D, polypeptide 6
OG0000282	AT3G28740	CYP81D11__Cytochrome P450 superfamily protein
OG0000282	AT4G37310	CYP81H1__cytochrome P450, family 81, subfamily H, polypeptide 1
OG0000282	AT4G37320	CYP81D5__cytochrome P450, family 81, subfamily D, polypeptide 5
OG0000282	AT4G37330	CYP81D4__cytochrome P450, family 81, subfamily D, polypeptide 4
OG0000282	AT4G37340	CYP81D3__cytochrome P450, family 81, subfamily D, polypeptide 3
OG0000282	AT4G37360	CYP81D2__cytochrome P450, family 81, subfamily D, polypeptide 2
OG0000282	AT4G37370	CYP81D8__cytochrome P450, family 81, subfamily D, polypeptide 8
OG0000282	AT4G37400	CYP81F3__cytochrome P450, family 81, subfamily F, polypeptide 3
OG0000282	AT4G37410	CYP81F4__cytochrome P450, family 81, subfamily F, polypeptide 4
OG0000282	AT4G37430	CYP81F1_CYP91A2__cytochrome P450, family 91, subfamily A, polypeptide 2
OG0000282	AT5G10600	CYP81K2__cytochrome P450, family 81, subfamily K, polypeptide 2
OG0000282	AT5G10610	CYP81K1__cytochrome P450, family 81, subfamily K, polypeptide 1
OG0000282	AT5G36220	CYP81D1_CYP91A1__cytochrome p450 81d1
OG0000282	AT5G57220	CYP81F2__cytochrome P450, family 81, subfamily F, polypeptide 2
OG0000282	AT5G67310	CYP81G1__cytochrome P450, family 81, subfamily G, polypeptide 1
OG0000298	AT2G22440
OG0000298	AT4G29090	Ribonuclease H-like superfamily protein
OG0000298	ATMG00310	ORF154__RNA-directed DNA polymerase (reverse transcriptase)-related family protein
OG0000299	AT1G03400	2-oxoglutarate (2OG) and Fe(II)-dependent oxygenase superfamily protein
OG0000299	AT1G03410	2A6__2-oxoglutarate (2OG) and Fe(II)-dependent oxygenase superfamily protein
OG0000299	AT1G04350	2-oxoglutarate (2OG) and Fe(II)-dependent oxygenase superfamily protein
OG0000299	AT1G04380	2-oxoglutarate (2OG) and Fe(II)-dependent oxygenase superfamily protein
OG0000299	AT1G06620	2-oxoglutarate (2OG) and Fe(II)-dependent oxygenase superfamily protein
OG0000299	AT1G06640	2-oxoglutarate (2OG) and Fe(II)-dependent oxygenase superfamily protein
OG0000299	AT1G06645	2-oxoglutarate (2OG) and Fe(II)-dependent oxygenase superfamily protein
OG0000299	AT1G06650	2-oxoglutarate (2OG) and Fe(II)-dependent oxygenase superfamily protein
OG0000299	AT2G25450	2-oxoglutarate (2OG) and Fe(II)-dependent oxygenase superfamily protein
OG0000299	AT2G30830	2-oxoglutarate (2OG) and Fe(II)-dependent oxygenase superfamily protein
OG0000299	AT2G30840	2-oxoglutarate (2OG) and Fe(II)-dependent oxygenase superfamily protein
OG0000299	AT3G61400	2-oxoglutarate (2OG) and Fe(II)-dependent oxygenase superfamily protein
OG0000299	AT5G43440	2-oxoglutarate (2OG) and Fe(II)-dependent oxygenase superfamily protein
OG0000299	AT5G43450	2-oxoglutarate (2OG) and Fe(II)-dependent oxygenase superfamily protein
OG0000299	AT5G59530	2-oxoglutarate (2OG) and Fe(II)-dependent oxygenase superfamily protein
OG0000299	AT5G59540	2-oxoglutarate (2OG) and Fe(II)-dependent oxygenase superfamily protein
OG0000301	AT1G17240	AtRLP2_RLP2__receptor like protein 2
OG0000301	AT1G17250	AtRLP3_RFO2_RLP3__receptor like protein 3
OG0000301	AT1G72300	PSY1R__Leucine-rich receptor-like protein kinase family protein
OG0000323	AT1G47710	AtSERPIN1_SERPIN1__Serine protease inhibitor (SERPIN) family protein
OG0000323	AT1G51330	Serine protease inhibitor (SERPIN) family protein
OG0000323	AT1G62160	Serine protease inhibitor (SERPIN) family protein
OG0000323	AT1G62170	Serine protease inhibitor (SERPIN) family protein
OG0000323	AT1G63280	Serine protease inhibitor (SERPIN) family protein
OG0000323	AT1G64010	Serine protease inhibitor (SERPIN) family protein
OG0000323	AT1G64020	Serine protease inhibitor (SERPIN) family protein
OG0000323	AT1G64030	ATSRP3_SRP3__serpin 3
OG0000323	AT2G14540	ATSRP2_SRP2__serpin 2
OG0000323	AT2G25240	AtCCP3_CCP3_SERP5__Serine protease inhibitor (SERPIN) family protein
OG0000323	AT2G26390	SERP4__Serine protease inhibitor (SERPIN) family protein
OG0000323	AT2G35580	Serine protease inhibitor (SERPIN) family protein
OG0000323	AT3G45220	Serine protease inhibitor (SERPIN) family protein
OG0000364	AT1G17930	MAIN__Aminotransferase-like, plant mobile domain family protein
OG0000364	AT2G04865	MAIL2__Aminotransferase-like, plant mobile domain family protein
OG0000364	AT2G25010	MAIL1__Aminotransferase-like, plant mobile domain family protein
OG0000377	AT2G23550	ABE1_ATMES6_MES6__methyl esterase 6
OG0000377	AT2G23560	ATMES7_MES7__methyl esterase 7
OG0000377	AT2G23580	ABE4_ATMES4_MES4__methyl esterase 4
OG0000377	AT2G23590	ATMES8_MES8__methyl esterase 8
OG0000377	AT2G23600	ACL_ATME8_ATMES2_ME8_MES2__acetone-cyanohydrin lyase
OG0000377	AT2G23610	ATMES3_MES3__methyl esterase 3
OG0000377	AT2G23620	ATMES1_MES1__methyl esterase 1
OG0000377	AT3G50440	ATMES10_MES10__methyl esterase 10
OG0000377	AT4G37140	ATMES20_MEE69_MES20__alpha/beta-Hydrolases superfamily protein
OG0000377	AT4G37150	ATMES9_MES9__methyl esterase 9
OG0000377	AT5G10300	AtHNL_ATMES5_HNL_MES5__methyl esterase 5
OG0000381	AT2G41010	ATCAMBP25_CAMBP25__calmodulin (CAM)-binding protein of 25 kDa
OG0000381	AT3G22160	JAV1__VQ motif-containing protein
OG0000381	AT3G56880	VQ motif-containing protein
OG0000381	AT4G15120	VQ motif-containing protein
OG0000381	AT4G20000	VQ motif-containing protein
OG0000381	AT4G39720	VQ motif-containing protein
OG0000381	AT5G65170	VQ motif-containing protein
OG0000387	AT4G03566
OG0000387	AT5G19270
OG0000400	AT5G37040	F-box family protein
OG0000409	AT2G24762	AtGDU4_GDU4__glutamine dumper 4
OG0000409	AT4G25760	ATGDU2_GDU2__glutamine dumper 2
OG0000409	AT4G31730	GDU1__glutamine dumper 1
OG0000409	AT5G24920	AtGDU5_GDU5__glutamine dumper 5
OG0000409	AT5G38770	AtGDU7_GDU7__glutamine dumper 7
OG0000409	AT5G57685	ATGDU3_GDU3_LSB1__glutamine dumper 3
OG0000411	AT1G13570	F-box/RNI-like superfamily protein
OG0000411	AT1G32375	F-box/RNI-like/FBD-like domains-containing protein
OG0000411	AT1G55030	RNI-like superfamily protein
OG0000411	AT1G55660	FOF2__FBD, F-box and Leucine Rich Repeat domains containing protein
OG0000411	AT1G67390	F-box family protein
OG0000411	AT2G04230	FBD, F-box and Leucine Rich Repeat domains containing protein
OG0000411	AT2G26860	FBD, F-box and Leucine Rich Repeat domains containing protein
OG0000411	AT3G14710	RNI-like superfamily protein
OG0000411	AT3G26920	FBD / Leucine Rich Repeat domains containing protein
OG0000411	AT3G26922	F-box/RNI-like superfamily protein
OG0000411	AT3G26930	Protein with RNI-like/FBD-like domains
OG0000411	AT3G44080	F-box family protein
OG0000411	AT3G44090	F-box family protein
OG0000411	AT3G49020	FBD, F-box and Leucine Rich Repeat domains containing protein
OG0000411	AT3G49030	FBD, F-box and Leucine Rich Repeat domains containing protein
OG0000411	AT3G49040	F-box/RNI-like superfamily protein
OG0000411	AT3G50710	F-box/RNI-like/FBD-like domains-containing protein
OG0000411	AT3G51530	F-box/RNI-like/FBD-like domains-containing protein
OG0000411	AT3G52680	F-box/RNI-like/FBD-like domains-containing protein
OG0000411	AT3G52690	RNI-like superfamily protein
OG0000411	AT3G54910	RNI-like superfamily protein
OG0000411	AT3G60790	F-box family protein
OG0000411	AT4G00160	F-box/RNI-like/FBD-like domains-containing protein
OG0000411	AT4G00315	FOL1__F-box/RNI-like/FBD-like domains-containing protein
OG0000411	AT4G09920	FBD, F-box and Leucine Rich Repeat domains containing protein
OG0000411	AT4G10400	F-box/RNI-like/FBD-like domains-containing protein
OG0000411	AT4G10410	Leucine-rich repeat (LRR) family protein
OG0000411	AT4G10420	FBD / Leucine Rich Repeat domains containing protein
OG0000411	AT4G13965	Protein with RNI-like/FBD-like domains
OG0000411	AT4G15060	FOL2
OG0000411	AT4G26340	F-box/RNI-like/FBD-like domains-containing protein
OG0000411	AT4G26350	F-box/RNI-like/FBD-like domains-containing protein
OG0000411	AT5G02910	F-box/RNI-like superfamily protein
OG0000411	AT5G02930	F-box/RNI-like superfamily protein
OG0000411	AT5G03100	F-box/RNI-like superfamily protein
OG0000411	AT5G11370	FBD / Leucine Rich Repeat domains containing protein
OG0000411	AT5G38565	F-box/FBD-like domains containing protein
OG0000411	AT5G38570	F-box/RNI-like superfamily protein
OG0000411	AT5G38590	F-box/RNI-like/FBD-like domains-containing protein
OG0000411	AT5G50270	F-box/RNI-like/FBD-like domains-containing protein
OG0000411	AT5G56325	FBD-like domain family protein
OG0000411	AT5G56370	F-box/RNI-like/FBD-like domains-containing protein
OG0000411	AT5G56380	F-box/RNI-like/FBD-like domains-containing protein
OG0000411	AT5G56390	F-box/RNI-like/FBD-like domains-containing protein
OG0000411	AT5G56400	FBD, F-box, Skp2-like and Leucine Rich Repeat domains containing protein
OG0000411	AT5G56410	Protein with RNI-like/FBD-like domains
OG0000411	AT5G56420	F-box/RNI-like/FBD-like domains-containing protein
OG0000411	AT5G56430	F-box/FBD-like domains containing protein
OG0000411	AT5G56440	F-box/RNI-like/FBD-like domains-containing protein
OG0000411	AT5G56452	FBD-like domain family protein
OG0000411	AT5G56560	FBD, F-box and Leucine Rich Repeat domains containing protein
OG0000411	AT5G56570	Leucine-rich repeat (LRR) family protein
OG0000411	AT5G56690	FBD, F-box and Leucine Rich Repeat domains containing protein
OG0000411	AT5G56700	FBD / Leucine Rich Repeat domains containing protein
OG0000411	AT5G56800	Protein with RNI-like/FBD-like domains
OG0000411	AT5G56810	F-box/RNI-like/FBD-like domains-containing protein
OG0000411	AT5G56820	F-box/RNI-like/FBD-like domains-containing protein
OG0000411	AT5G60610	F-box/RNI-like superfamily protein
OG0000411	AT5G62970	Protein with RNI-like/FBD-like domains
OG0000429	AT1G54890	Late embryogenesis abundant (LEA) protein-related
OG0000429	AT3G19430	late embryogenesis abundant protein-related / LEA protein-related
OG0000429	AT4G27400	Late embryogenesis abundant (LEA) protein-related
OG0000429	AT5G54370	Late embryogenesis abundant (LEA) protein-related
OG0000429	AT5G60520	Late embryogenesis abundant (LEA) protein-related
OG0000429	AT5G60530	late embryogenesis abundant protein-related / LEA protein-related
OG0000430	AT1G55775
OG0000430	AT3G07600	Heavy metal transport/detoxification superfamily protein
OG0000430	AT3G20180	Copper transport protein family
OG0000430	AT4G05030	Copper transport protein family
OG0000430	AT5G48290	Heavy metal transport/detoxification superfamily protein
OG0000462	AT1G32600	F-box associated ubiquitination effector family protein
OG0000462	AT1G54640	F-box family protein-related
OG0000462	AT3G06240	F-box family protein
OG0000462	AT3G07870	FBX92__F-box and associated interaction domains-containing protein
OG0000462	AT3G10790	F-box associated ubiquitination effector family protein
OG0000462	AT3G16210	F-box family protein
OG0000462	AT3G19470	F-box and associated interaction domains-containing protein
OG0000462	AT3G20710	F-box family protein
OG0000462	AT3G23880	F-box and associated interaction domains-containing protein
OG0000462	AT4G12560	CPR1_CPR30__F-box and associated interaction domains-containing protein
OG0000462	AT4G22390	F-box associated ubiquitination effector family protein
OG0000462	AT5G42460	F-box and associated interaction domains-containing protein
OG0000468	AT4G03625
OG0000468	AT4G03630	RNI-like superfamily protein
OG0000468	AT4G03635
OG0000468	AT4G05460	AtSKIP19_SKIP19__RNI-like superfamily protein
OG0000468	AT4G05470	RNI-like superfamily protein
OG0000468	AT4G05475	RNI-like superfamily protein
OG0000468	AT4G05490	RNI-like superfamily protein
OG0000468	AT4G05497	RNI-like superfamily protein
OG0000468	AT5G52480	RNI-like superfamily protein
OG0000480	AT1G20990	Cysteine/Histidine-rich C1 domain family protein
OG0000480	AT1G45243	Cysteine/Histidine-rich C1 domain family protein
OG0000480	AT2G16050	Cysteine/Histidine-rich C1 domain family protein
OG0000480	AT2G17590	Cysteine/Histidine-rich C1 domain family protein
OG0000480	AT2G37780	Cysteine/Histidine-rich C1 domain family protein
OG0000480	AT2G37800	Cysteine/Histidine-rich C1 domain family protein
OG0000480	AT2G37805
OG0000480	AT2G37810	Cysteine/Histidine-rich C1 domain family protein
OG0000480	AT2G37820	Cysteine/Histidine-rich C1 domain family protein
OG0000480	AT3G26250	Cysteine/Histidine-rich C1 domain family protein
OG0000480	AT3G59120	Cysteine/Histidine-rich C1 domain family protein
OG0000480	AT4G01925	Cysteine/Histidine-rich C1 domain family protein
OG0000480	AT5G01480	Cysteine/Histidine-rich C1 domain family protein
OG0000485	AT3G09120	Protein of unknown function (DUF674)
OG0000485	AT5G01130	Protein of unknown function (DUF674)
OG0000506	AT1G43722
OG0000506	AT3G30525
OG0000506	AT5G28730
OG0000506	AT5G35695
OG0000507	AT5G28950
OG0000507	AT5G41980
OG0000513	AT5G25930	Protein kinase family protein with leucine-rich repeat domain
OG0000528	AT2G24960
OG0000528	AT4G02210
OG0000535	AT1G03700	CASPL1C2__Uncharacterised protein family (UPF0497)
OG0000535	AT1G14160	CASPL1A1__Uncharacterised protein family (UPF0497)
OG0000535	AT2G27370	CASP3__Uncharacterised protein family (UPF0497)
OG0000535	AT2G36100	CASP1__Uncharacterised protein family (UPF0497)
OG0000535	AT3G11550	CASP2__Uncharacterised protein family (UPF0497)
OG0000535	AT4G03540	CASPL1C1__Uncharacterised protein family (UPF0497)
OG0000535	AT4G20390	CASPL1B2__Uncharacterised protein family (UPF0497)
OG0000535	AT4G25040	CASPL1F1__Uncharacterised protein family (UPF0497)
OG0000535	AT5G06200	CASP4__Uncharacterised protein family (UPF0497)
OG0000535	AT5G15290	CASP5__Uncharacterised protein family (UPF0497)
OG0000535	AT5G44550	CASPL1B1__Uncharacterised protein family (UPF0497)
OG0000541	AT3G02100	UDP-Glycosyltransferase superfamily protein
OG0000564	AT1G27740	RSL4__root hair defective 6-like 4
OG0000564	AT1G66470	AtRHD6_RHD6__ROOT HAIR DEFECTIVE6
OG0000564	AT2G14760	basic helix-loop-helix (bHLH) DNA-binding superfamily protein
OG0000564	AT4G33880	RSL2__ROOT HAIR DEFECTIVE 6-LIKE 2
OG0000564	AT5G37800	ATRSL1_RSL1__RHD SIX-LIKE 1
OG0000564	AT5G43175	basic helix-loop-helix (bHLH) DNA-binding superfamily protein
OG0000576	AT1G49390	2-oxoglutarate (2OG) and Fe(II)-dependent oxygenase superfamily protein
OG0000576	AT5G20400	2-oxoglutarate (2OG) and Fe(II)-dependent oxygenase superfamily protein
OG0000576	AT5G20550	2-oxoglutarate (2OG) and Fe(II)-dependent oxygenase superfamily protein
OG0000576	AT5G54000	2-oxoglutarate (2OG) and Fe(II)-dependent oxygenase superfamily protein
OG0000582	AT1G43650	UMAMIT22__nodulin MtN21 /EamA-like transporter family protein
OG0000582	AT5G64700	UMAMIT21__nodulin MtN21 /EamA-like transporter family protein
OG0000590	AT1G07747	Bifunctional inhibitor/lipid-transfer protein/seed storage 2S albumin superfamily protein
OG0000590	AT1G43665	Bifunctional inhibitor/lipid-transfer protein/seed storage 2S albumin superfamily protein
OG0000590	AT1G43666	Bifunctional inhibitor/lipid-transfer protein/seed storage 2S albumin superfamily protein
OG0000590	AT1G43667	Bifunctional inhibitor/lipid-transfer protein/seed storage 2S albumin superfamily protein
OG0000590	AT1G48750	Bifunctional inhibitor/lipid-transfer protein/seed storage 2S albumin superfamily protein
OG0000590	AT1G66850	Bifunctional inhibitor/lipid-transfer protein/seed storage 2S albumin superfamily protein
OG0000590	AT1G73780	Bifunctional inhibitor/lipid-transfer protein/seed storage 2S albumin superfamily protein
OG0000590	AT2G14846	Bifunctional inhibitor/lipid-transfer protein/seed storage 2S albumin superfamily protein
OG0000590	AT3G18280	AtTED4_TED4__Bifunctional inhibitor/lipid-transfer protein/seed storage 2S albumin superfamily protein
OG0000590	AT3G29152	Bifunctional inhibitor/lipid-transfer protein/seed storage 2S albumin superfamily protein
OG0000590	AT3G57310	Bifunctional inhibitor/lipid-transfer protein/seed storage 2S albumin superfamily protein
OG0000590	AT4G12825	Bifunctional inhibitor/lipid-transfer protein/seed storage 2S albumin superfamily protein
OG0000590	AT5G38160	Bifunctional inhibitor/lipid-transfer protein/seed storage 2S albumin superfamily protein
OG0000590	AT5G38170	Bifunctional inhibitor/lipid-transfer protein/seed storage 2S albumin superfamily protein
OG0000590	AT5G38180	Bifunctional inhibitor/lipid-transfer protein/seed storage 2S albumin superfamily protein
OG0000590	AT5G38195	Bifunctional inhibitor/lipid-transfer protein/seed storage 2S albumin superfamily protein
OG0000590	AT5G38197	Bifunctional inhibitor/lipid-transfer protein/seed storage 2S albumin superfamily protein
OG0000602	AT2G41473	F-box family protein
OG0000676	AT2G38290	AMT2_AMT2;1_ATAMT2__ammonium transporter 2
OG0000689	AT1G59950	NAD(P)-linked oxidoreductase superfamily protein
OG0000689	AT1G59960	NAD(P)-linked oxidoreductase superfamily protein
OG0000689	AT5G62420	NAD(P)-linked oxidoreductase superfamily protein
OG0000692	AT3G19184	AP2/B3-like transcriptional factor family protein
OG0000692	AT5G42700	AP2/B3-like transcriptional factor family protein
OG0000692	AT5G58280	AP2/B3-like transcriptional factor family protein
OG0000697	AT3G62160	HXXXD-type acyl-transferase family protein
OG0000720	AT5G57500	Galactosyltransferase family protein
OG0000755	AT3G15910
OG0000785	AT3G18670	Ankyrin repeat family protein
OG0000785	AT3G54065
OG0000785	AT3G54070	Ankyrin repeat family protein
OG0000785	AT5G04680	Ankyrin repeat family protein
OG0000785	AT5G04690	Ankyrin repeat family protein
OG0000785	AT5G04700	Ankyrin repeat family protein
OG0000785	AT5G04730	Ankyrin-repeat containing protein
OG0000785	AT5G35810	Ankyrin repeat family protein
OG0000795	AT1G40087	Plant transposase (Ptta/En/Spm family)
OG0000795	AT3G30200	Plant transposase (Ptta/En/Spm family)
OG0000796	AT4G19080	Protein of unknown function (DUF594)
OG0000796	AT4G19090	Protein of unknown function (DUF594)
OG0000796	AT5G45460
OG0000796	AT5G45470	Protein of unknown function (DUF594)
OG0000796	AT5G45480	Protein of unknown function (DUF594)
OG0000796	AT5G45530	Protein of unknown function (DUF594)
OG0000796	AT5G45540	Protein of unknown function (DUF594)
OG0000797	AT2G01050	zinc ion binding;nucleic acid binding
OG0000807	AT1G06980
OG0000807	AT1G29195
OG0000807	AT2G30230
OG0000843	AT2G13770
OG0000843	AT3G22935
OG0000848	AT1G13880	ELM2__ELM2 domain-containing protein
OG0000848	AT1G26580
OG0000848	AT2G03470	ELM2 domain-containing protein
OG0000848	AT2G46040	ARID1__ARID/BRIGHT DNA-binding domain;ELM2 domain protein
OG0000848	AT4G11400	ARID/BRIGHT DNA-binding domain;ELM2 domain protein
OG0000849	AT4G08267	hAT transposon superfamily protein
OG0000929	AT2G39050	ArathEULS3_EULS3__hydroxyproline-rich glycoprotein family protein
OG0000978	AT1G14930	Polyketide cyclase/dehydrase and lipid transport superfamily protein
OG0000978	AT1G14940	Polyketide cyclase/dehydrase and lipid transport superfamily protein
OG0000978	AT1G14950	Polyketide cyclase/dehydrase and lipid transport superfamily protein
OG0000978	AT1G14960	Polyketide cyclase/dehydrase and lipid transport superfamily protein
OG0000978	AT1G23120	Polyketide cyclase/dehydrase and lipid transport superfamily protein
OG0000978	AT1G23130	Polyketide cyclase/dehydrase and lipid transport superfamily protein
OG0000978	AT1G23910	Polyketide cyclase/dehydrase and lipid transport superfamily protein
OG0000978	AT1G24000	Polyketide cyclase/dehydrase and lipid transport superfamily protein
OG0000978	AT1G24010	Polyketide cyclase/dehydrase and lipid transport superfamily protein
OG0000978	AT1G24020	MLP423__MLP-like protein 423
OG0000978	AT1G30990	Polyketide cyclase/dehydrase and lipid transport superfamily protein
OG0000978	AT1G35260	MLP165__MLP-like protein 165
OG0000978	AT1G35310	MLP168__MLP-like protein 168
OG0000978	AT1G70830	MLP28__MLP-like protein 28
OG0000978	AT1G70840	MLP31__MLP-like protein 31
OG0000978	AT1G70850	MLP34__MLP-like protein 34
OG0000978	AT1G70870	Polyketide cyclase/dehydrase and lipid transport superfamily protein
OG0000978	AT1G70880	Polyketide cyclase/dehydrase and lipid transport superfamily protein
OG0000978	AT1G70890	MLP43_MLP43__MLP-like protein 43
OG0000978	AT2G01520	MLP328_ZCE1__MLP-like protein 328
OG0000978	AT2G01530	MLP329_ZCE2__MLP-like protein 329
OG0000978	AT3G26450	Polyketide cyclase/dehydrase and lipid transport superfamily protein
OG0000978	AT3G26460	Polyketide cyclase/dehydrase and lipid transport superfamily protein
OG0000978	AT4G14060	Polyketide cyclase/dehydrase and lipid transport superfamily protein
OG0000978	AT4G23670	Polyketide cyclase/dehydrase and lipid transport superfamily protein
OG0000978	AT4G23680	Polyketide cyclase/dehydrase and lipid transport superfamily protein
OG0000978	AT5G28000	Polyketide cyclase/dehydrase and lipid transport superfamily protein
OG0000978	AT5G28010	Polyketide cyclase/dehydrase and lipid transport superfamily protein
OG0000985	AT5G08350	GRAM domain-containing protein / ABA-responsive protein-related
OG0000985	AT5G23350	GRAM domain-containing protein / ABA-responsive protein-related
OG0000985	AT5G23360	GRAM domain-containing protein / ABA-responsive protein-related
OG0000985	AT5G23370	GRAM domain-containing protein / ABA-responsive protein-related
OG0000995	AT1G52140
OG0000995	AT3G16330
OG0000995	AT4G29110
OG0000995	AT4G32860
OG0001013	AT1G54400	HSP20-like chaperones superfamily protein
OG0001013	AT2G27140	HSP20-like chaperones superfamily protein
OG0001013	AT5G20970	HSP20-like chaperones superfamily protein
OG0001017	AT1G49290
OG0001017	AT1G64870
OG0001017	AT2G44925
OG0001017	AT3G45200
OG0001017	AT5G11220
OG0001017	AT5G13620
OG0001017	AT5G24355
OG0001027	AT1G65780	P-loop containing nucleoside triphosphate hydrolases superfamily protein
OG0001027	AT1G65810	P-loop containing nucleoside triphosphate hydrolases superfamily protein
OG0001027	AT4G05540	P-loop containing nucleoside triphosphate hydrolases superfamily protein
OG0001027	AT5G37030	P-loop containing nucleoside triphosphate hydrolases superfamily protein
OG0001027	AT5G37140	P-loop containing nucleoside triphosphate hydrolases superfamily protein
OG0001027	AT5G37150	P-loop containing nucleoside triphosphate hydrolases superfamily protein
OG0001027	AT5G37160	P-loop containing nucleoside triphosphate hydrolases superfamily protein
OG0001027	AT5G37165
OG0001027	AT5G52090	P-loop containing nucleoside triphosphate hydrolases superfamily protein
OG0001059	AT3G02645	Plant protein of unknown function (DUF247)
OG0001070	AT1G58270	ZW9__TRAF-like family protein
OG0001070	AT1G65050	TRAF-like superfamily protein
OG0001070	AT1G65150	TRAF-like family protein
OG0001070	AT1G65370	TRAF-like family protein
OG0001070	AT1G69650	TRAF-like family protein
OG0001070	AT1G69660	TRAF-like family protein
OG0001070	AT2G04170	TRAF-like family protein
OG0001070	AT2G04190	TRAF-like family protein
OG0001070	AT2G15710	TRAF-like family protein
OG0001070	AT2G32870	TRAF-like family protein
OG0001070	AT2G32880	TRAF-like family protein
OG0001070	AT3G17380	TRAF-like family protein
OG0001070	AT3G20360	TRAF-like family protein
OG0001070	AT3G20370	TRAF-like family protein
OG0001070	AT3G20380	TRAF-like family protein
OG0001070	AT3G22080	TRAF-like family protein
OG0001070	AT3G22085
OG0001070	AT3G28220	TRAF-like family protein
OG0001070	AT3G46190	TRAF-like family protein
OG0001070	AT4G00780	TRAF-like family protein
OG0001070	AT4G01390	TRAF-like family protein
OG0001070	AT4G09770	TRAF-like family protein
OG0001070	AT4G09780	TRAF-like family protein
OG0001070	AT5G26260	TRAF-like family protein
OG0001070	AT5G26280	TRAF-like family protein
OG0001070	AT5G26290	RAMGaP__TRAF-like family protein
OG0001070	AT5G26300	TRAF-like family protein
OG0001070	AT5G26320	TRAF-like family protein
OG0001096	AT1G21280
OG0001102	AT3G51380	IQD20__IQ-domain 20
OG0001102	AT4G14750	IQD19__IQ-domain 19
OG0001116	AT3G52490	SMXL3__Double Clp-N motif-containing P-loop nucleoside triphosphate hydrolases superfamily protein
OG0001116	AT4G29920	AtHSPR_SMXL4__Double Clp-N motif-containing P-loop nucleoside triphosphate hydrolases superfamily protein
OG0001116	AT5G57130	SMXL5__Clp amino terminal domain-containing protein
OG0001131	AT1G06000	UGT89C1__UDP-Glycosyltransferase superfamily protein
OG0001131	AT1G51210	UDP-Glycosyltransferase superfamily protein
OG0001131	AT1G73880	UGT89B1__UDP-glucosyl transferase 89B1
OG0001131	AT5G03490	UGT89A2__UDP-Glycosyltransferase superfamily protein
OG0001137	AT1G23010	LPR1__Cupredoxin superfamily protein
OG0001137	AT1G71040	LPR2__Cupredoxin superfamily protein
OG0001147	AT1G16520
OG0001147	AT1G56080
OG0001147	AT4G15545
OG0001150	AT5G12890	UDP-Glycosyltransferase superfamily protein
OG0001153	AT1G35150	General transcription factor 2-related zinc finger protein
OG0001153	AT2G06500	hAT family dimerisation domain
OG0001153	AT2G16040	hAT dimerisation domain-containing protein / transposase-related
OG0001153	AT3G29638	General transcription factor 2-related zinc finger protein
OG0001153	AT3G29794
OG0001153	AT4G10200	TTF-type zinc finger protein with HAT dimerisation domain
OG0001153	AT5G35475	General transcription factor 2-related zinc finger protein
OG0001163	AT3G04280	ARR22_RR22__response regulator 22
OG0001163	AT5G26594	ARR24_RR24__response regulator 24
OG0001171	AT2G37870	Bifunctional inhibitor/lipid-transfer protein/seed storage 2S albumin superfamily protein
OG0001171	AT3G53980	Bifunctional inhibitor/lipid-transfer protein/seed storage 2S albumin superfamily protein
OG0001171	AT5G05960	Bifunctional inhibitor/lipid-transfer protein/seed storage 2S albumin superfamily protein
OG0001177	AT1G71695	Peroxidase superfamily protein
OG0001181	AT2G24140	Protein of unknown function, DUF593
OG0001181	AT3G11850	Protein of unknown function, DUF593
OG0001181	AT3G54740	Protein of unknown function, DUF593
OG0001181	AT4G30830	Protein of unknown function, DUF593
OG0001181	AT5G06560	MyoB7__Protein of unknown function, DUF593
OG0001181	AT5G57830	Protein of unknown function, DUF593
OG0001185	ATCG00860	YCF2.1__Chloroplast Ycf2;ATPase, AAA type, core
OG0001185	ATCG01280	YCF2.2__Chloroplast Ycf2;ATPase, AAA type, core
OG0001213	ATCG00340	PSAB__Photosystem I, PsaA/PsaB protein
OG0001213	ATCG00350	PSAA__Photosystem I, PsaA/PsaB protein
OG0001214	AT3G06210	ARM repeat superfamily protein
OG0001214	AT4G14280	ARM repeat superfamily protein
OG0001214	AT5G18980	ARM repeat superfamily protein
OG0001240	AT2G32020	Acyl-CoA N-acyltransferases (NAT) superfamily protein
OG0001240	AT2G32030	Acyl-CoA N-acyltransferases (NAT) superfamily protein
OG0001240	AT3G22560	Acyl-CoA N-acyltransferases (NAT) superfamily protein
OG0001245	AT1G75500	UMAMIT5_WAT1__Walls Are Thin 1
OG0001245	AT3G18200	UMAMIT4__nodulin MtN21 /EamA-like transporter family protein
OG0001245	AT3G53210	UMAMIT6__nodulin MtN21 /EamA-like transporter family protein
OG0001247	AT3G63030	MBD4__methyl-CPG-binding domain 4
OG0001247	AT4G00416	MBD3__methyl-CPG-binding domain 3
OG0001247	AT4G22745	MBD1__methyl-CPG-binding domain 1
OG0001247	AT5G35330	ATMBD2_MBD02_MBD2__methyl-CPG-binding domain protein 02
OG0001247	AT5G35338	MBD12__methyl-CPG-binding domain 12
OG0001258	AT5G24900	CYP714A2_ELA2__cytochrome P450, family 714, subfamily A, polypeptide 2
OG0001258	AT5G24910	CYP714A1_ELA1__cytochrome P450, family 714, subfamily A, polypeptide 1
OG0001263	AT2G10560
OG0001263	AT2G25460
OG0001263	AT3G11760
OG0001263	AT5G04860
OG0001294	AT2G34730	myosin heavy chain-related
OG0001294	AT5G14990
OG0001303	AT2G27710	60S acidic ribosomal protein family
OG0001303	AT2G27720	60S acidic ribosomal protein family
OG0001303	AT3G28500	60S acidic ribosomal protein family
OG0001303	AT3G44590	60S acidic ribosomal protein family
OG0001303	AT5G40040	60S acidic ribosomal protein family
OG0001347	AT5G48550	F-box associated ubiquitination effector family protein
OG0001354	AT1G53870	Protein of unknown function (DUF567)
OG0001354	AT1G53875
OG0001354	AT1G53890	Protein of unknown function (DUF567)
OG0001354	AT1G63410	Protein of unknown function (DUF567)
OG0001354	AT3G14260	Protein of unknown function (DUF567)
OG0001358	AT4G32090	Beta-1,3-N-Acetylglucosaminyltransferase family protein
OG0001358	AT4G32100	Beta-1,3-N-Acetylglucosaminyltransferase family protein
OG0001358	AT4G32105	Beta-1,3-N-Acetylglucosaminyltransferase family protein
OG0001358	AT4G32110	Beta-1,3-N-Acetylglucosaminyltransferase family protein
OG0001388	AT2G41070	ATBZIP12_DPBF4_EEL__Basic-leucine zipper (bZIP) transcription factor family protein
OG0001388	AT3G56850	AREB3_DPBF3__ABA-responsive element binding protein 3
OG0001401	AT2G20310	RIN13__RPM1 interacting protein 13
OG0001401	AT4G27660
OG0001401	AT4G28690
OG0001401	AT5G54148
OG0001401	AT5G54150
OG0001404	AT3G55900	F-box family protein
OG0001417	AT5G15410	ATCNGC2_CNGC2_DND1__Cyclic nucleotide-regulated ion channel family protein
OG0001417	AT5G54250	ATCNGC4_CNGC4_DND2_HLM1__cyclic nucleotide-gated cation channel 4
OG0001438	AT1G09250	AIF4__basic helix-loop-helix (bHLH) DNA-binding superfamily protein
OG0001438	AT3G05800	AIF1__AtBS1(activation-tagged BRI1 suppressor 1)-interacting factor 1
OG0001438	AT3G06590	AIF2_RITF1__basic helix-loop-helix (bHLH) DNA-binding superfamily protein
OG0001438	AT3G17100	AIF3__sequence-specific DNA binding transcription factors
OG0001448	AT3G47680	DNA binding
OG0001448	AT5G52547
OG0001454	AT5G11660	Protein of Unknown Function (DUF239)
OG0001462	AT2G15130	Plant basic secretory protein (BSP) family protein
OG0001462	AT2G15170	Plant basic secretory protein (BSP) family protein
OG0001462	AT2G15220	Plant basic secretory protein (BSP) family protein
OG0001466	AT1G34070
OG0001466	AT5G48050
OG0001467	AT1G29520	AWPM-19-like family protein
OG0001467	AT5G18970	AWPM-19-like family protein
OG0001467	AT5G46530	AWPM-19-like family protein
OG0001471	AT1G55790	Domain of unknown function (DUF2431)
OG0001471	AT1G55800	Domain of unknown function (DUF2431)
OG0001471	AT1G55803
OG0001471	AT2G11045
OG0001471	AT4G26485	Domain of unknown function (DUF2431)
OG0001471	AT5G25030	Domain of unknown function (DUF2431)
OG0001471	AT5G56060	Domain of unknown function (DUF2431)
OG0001471	AT5G56075	Domain of unknown function (DUF2431)
OG0001501	AT1G61215	BRD4__bromodomain 4
OG0001501	AT2G42150	DNA-binding bromodomain-containing protein
OG0001501	AT2G44430	DNA-binding bromodomain-containing protein
OG0001501	AT3G57980	DNA-binding bromodomain-containing protein
OG0001501	AT3G60110	DNA-binding bromodomain-containing protein
OG0001519	AT1G26680	transcriptional factor B3 family protein
OG0001519	AT2G13985
OG0001519	AT2G24645	Transcriptional factor B3 family protein
OG0001519	AT2G24650	DNA binding;DNA binding;sequence-specific DNA binding transcription factors
OG0001519	AT2G24680	transcriptional factor B3 family protein
OG0001519	AT2G24681	AP2/B3-like transcriptional factor family protein
OG0001519	AT2G24690	Transcriptional factor B3 family protein
OG0001519	AT2G24696	transcriptional factor B3 family protein
OG0001519	AT2G24700	Transcriptional factor B3 family protein
OG0001519	AT4G00260	MEE45__Transcriptional factor B3 family protein
OG0001519	AT4G31610	ATREM1_REM1_REM34__Transcriptional factor B3 family protein
OG0001519	AT4G31615	REM35__Transcriptional factor B3 family protein
OG0001519	AT4G31620	REM36__Transcriptional factor B3 family protein
OG0001519	AT4G31630	Transcriptional factor B3 family protein
OG0001519	AT4G31640	transcriptional factor B3 family protein
OG0001519	AT4G31650	Transcriptional factor B3 family protein
OG0001519	AT4G31660	AP2/B3-like transcriptional factor family protein
OG0001519	AT4G31680	Transcriptional factor B3 family protein
OG0001519	AT4G31685
OG0001519	AT4G31690	Transcriptional factor B3 family protein
OG0001519	AT5G32460	Transcriptional factor B3 family protein
OG0001543	AT1G32150	AtbZIP68_bZIP68__basic region/leucine zipper transcription factor 68
OG0001543	AT2G35530	AtbZIP16_bZIP16__basic region/leucine zipper transcription factor 16
OG0001545	AT4G00870	bHLH014_bHLH14__basic helix-loop-helix (bHLH) DNA-binding superfamily protein
OG0001574	AT2G26170	CYP711A1_MAX1__cytochrome P450, family 711, subfamily A, polypeptide 1
OG0001603	AT1G31670	Copper amine oxidase family protein
OG0001603	AT1G31690	Copper amine oxidase family protein
OG0001603	AT1G31710	Copper amine oxidase family protein
OG0001603	AT1G62810	CuAO1__Copper amine oxidase family protein
OG0001603	AT3G43670	Copper amine oxidase family protein
OG0001603	AT4G12270	Copper amine oxidase family protein
OG0001603	AT4G12280	copper amine oxidase family protein
OG0001603	AT4G12290	Copper amine oxidase family protein
OG0001603	AT4G14940	AO1_ATAO1__amine oxidase 1
OG0001605	AT1G09665	Toll-Interleukin-Resistance (TIR) domain family protein
OG0001605	AT1G52900	Toll-Interleukin-Resistance (TIR) domain family protein
OG0001605	AT1G57670	Toll-Interleukin-Resistance (TIR) domain family protein
OG0001605	AT1G61105	Toll-Interleukin-Resistance (TIR) domain family protein
OG0001605	AT2G03030	Toll-Interleukin-Resistance (TIR) domain family protein
OG0001605	AT2G03300	ATTX12__Toll-Interleukin-Resistance (TIR) domain family protein
OG0001605	AT4G23515	Toll-Interleukin-Resistance (TIR) domain family protein
OG0001605	AT5G38344	Toll-Interleukin-Resistance (TIR) domain family protein
OG0001605	AT5G44900	Toll-Interleukin-Resistance (TIR) domain family protein
OG0001605	AT5G44910	Toll-Interleukin-Resistance (TIR) domain family protein
OG0001605	AT5G44920	AtTIK_TIK__Toll-Interleukin-Resistance (TIR) domain family protein
OG0001605	AT5G45220	Disease resistance protein (TIR-NBS-LRR class) family
OG0001607	AT1G16640	AP2/B3-like transcriptional factor family protein
OG0001607	AT1G49480	RTV1__related to vernalization1 1
OG0001607	AT3G18990	REM39_VRN1__AP2/B3-like transcriptional factor family protein
OG0001607	AT4G34400	AP2/B3-like transcriptional factor family protein
OG0001607	AT5G57720	AP2/B3-like transcriptional factor family protein
OG0001607	AT5G66980	AP2/B3-like transcriptional factor family protein
OG0001608	AT1G31490	HXXXD-type acyl-transferase family protein
OG0001628	AT1G19840	SAUR53__SAUR-like auxin-responsive protein family
OG0001628	AT1G75590	SAUR52__SAUR-like auxin-responsive protein family
OG0001628	AT4G34750	SAUR49__SAUR-like auxin-responsive protein family
OG0001628	AT5G10990	SAUR69__SAUR-like auxin-responsive protein family
OG0001635	AT1G03365	RING/U-box superfamily protein
OG0001635	AT1G32530	RING/U-box superfamily protein
OG0001635	AT2G35330	RING/U-box superfamily protein
OG0001635	AT4G03000	RING/U-box superfamily protein
OG0001638	AT1G03300	ATDUF1_DUF1__DOMAIN OF UNKNOWN FUNCTION 724 1
OG0001638	AT1G06340	Plant Tudor-like protein
OG0001638	AT1G09320	agenet domain-containing protein
OG0001638	AT1G11420	ATDUF2_DUF2__DOMAIN OF UNKNOWN FUNCTION 724 2
OG0001638	AT1G26540	Agenet domain-containing protein
OG0001638	AT2G47230	ATDUF6_DUF6__DOMAIN OF UNKNOWN FUNCTION 724 6
OG0001638	AT3G06520	agenet domain-containing protein
OG0001638	AT3G62300	AIP1_ATDUF7_DUF7__DOMAIN OF UNKNOWN FUNCTION 724 7
OG0001655	AT3G46580	ATMBD5_MBD05_MBD5__methyl-CPG-binding domain protein 5
OG0001655	AT5G52230	MBD13__methyl-CPG-binding domain protein 13
OG0001655	AT5G59380	ATMBD6_MBD6__methyl-CPG-binding domain 6
OG0001655	AT5G59800	ATMBD7_MBD7__methyl-CPG-binding domain 7
OG0001686	AT5G40050	F-box/FBD-like domains containing protein
OG0001691	ATCG00890	NDHB.1__NADH-Ubiquinone/plastoquinone (complex I) protein
OG0001691	ATCG01250	NDHB.2__NADH-Ubiquinone/plastoquinone (complex I) protein
OG0001692	AT1G13130	Cellulase (glycosyl hydrolase family 5) protein
OG0001692	AT3G26130	Cellulase (glycosyl hydrolase family 5) protein
OG0001692	AT3G26140	Cellulase (glycosyl hydrolase family 5) protein
OG0001692	AT5G16700	Glycosyl hydrolase superfamily protein
OG0001692	AT5G17500	Glycosyl hydrolase superfamily protein
OG0001701	AT1G33560	ADR1__Disease resistance protein (CC-NBS-LRR class) family
OG0001701	AT3G26470	Powdery mildew resistance protein, RPW8 domain
OG0001701	AT4G33300	ADR1-L1__ADR1-like 1
OG0001701	AT5G04720	ADR1-L2_PHX21__ADR1-like 2
OG0001701	AT5G47280	ADR1-L3__ADR1-like 3
OG0001701	AT5G66890	Leucine-rich repeat (LRR) family protein
OG0001701	AT5G66900	Disease resistance protein (CC-NBS-LRR class) family
OG0001701	AT5G66910	Disease resistance protein (CC-NBS-LRR class) family
OG0001704	AT2G30140	UGT87A2__UDP-Glycosyltransferase superfamily protein
OG0001704	AT2G30150	UDP-Glycosyltransferase superfamily protein
OG0001731	AT1G50420	SCL-3_SCL3__scarecrow-like 3
OG0001748	AT5G45320
OG0001750	AT3G10870	ATMES17_MES17__methyl esterase 17
OG0001750	AT4G16690	ATMES16_MES16__methyl esterase 16
OG0001750	AT5G58310	ATMES18_MES18__methyl esterase 18
OG0001759	AT1G03170	FAF2_FTM5__Protein of unknown function (DUF3049)
OG0001759	AT3G06020	FAF4__Protein of unknown function (DUF3049)
OG0001759	AT4G02810	FAF1__Protein of unknown function (DUF3049)
OG0001759	AT5G19260	FAF3__Protein of unknown function (DUF3049)
OG0001759	AT5G22090	Protein of unknown function (DUF3049)
OG0001760	AT1G16400	CYP79F2__cytochrome P450, family 79, subfamily F, polypeptide 2
OG0001760	AT1G16410	BUS1_CYP79F1_SPS1__cytochrome p450 79f1
OG0001760	AT1G58260	CYP79C2_CYP79C3P__cytochrome p450 79c2
OG0001760	AT1G79370	CYP79C1__cytochrome P450, family 79, subfamily C, polypeptide 1
OG0001760	AT2G22330	CYP79B3__cytochrome P450, family 79, subfamily B, polypeptide 3
OG0001760	AT4G39950	CYP79B2__cytochrome P450, family 79, subfamily B, polypeptide 2
OG0001760	AT5G05260	CYP79A2__cytochrome p450 79a2
OG0001760	AT5G35917	CYP79A3P__cytochrome P450, family 79, subfamily A, polypeptide 3 pseudogene
OG0001760	AT5G35920	CYP79A4P__cytochrome P450, family 79, subfamily A, polypeptide 4 pseudogene
OG0001762	AT5G15685
OG0001768	AT1G13470	Protein of unknown function (DUF1262)
OG0001768	AT1G13480	Protein of unknown function (DUF1262)
OG0001768	AT1G13490	Protein of unknown function (DUF1262)
OG0001768	AT1G13500	Protein of unknown function (DUF1262)
OG0001768	AT1G13510	Protein of unknown function (DUF1262)
OG0001768	AT1G13520	Protein of unknown function (DUF1262)
OG0001768	AT1G13530	Protein of unknown function (DUF1262)
OG0001768	AT1G13540	Protein of unknown function (DUF1262)
OG0001768	AT1G13550	Protein of unknown function (DUF1262)
OG0001768	AT1G61600	Protein of unknown function (DUF1262)
OG0001797	AT5G45050	ATWRKY16_WRKY16__Disease resistance protein (TIR-NBS-LRR class)
OG0001797	AT5G45210	Disease resistance protein (TIR-NBS-LRR class) family
OG0001797	AT5G46490	Disease resistance protein (TIR-NBS-LRR class) family
OG0001812	AT3G02440	TBL20__TRICHOME BIREFRINGENCE-LIKE 20
OG0001812	AT5G15890	TBL21__TRICHOME BIREFRINGENCE-LIKE 21
OG0001812	AT5G15900	TBL19__TRICHOME BIREFRINGENCE-LIKE 19
OG0001813	AT3G04720	AtPR4_HEL_PR-4_PR4__pathogenesis-related 4
OG0001832	AT1G54470	RPP27__RNI-like superfamily protein
OG0001832	AT1G58190	AtRLP9_RLP9__receptor like protein 9
OG0001832	AT1G74180	AtRLP14_RLP14__receptor like protein 14
OG0001832	AT1G74190	AtRLP15_RLP15__receptor like protein 15
OG0001832	AT1G74200	AtRLP16_RLP16__receptor like protein 16
OG0001832	AT2G25470	AtRLP21_RLP21__receptor like protein 21
OG0001832	AT3G53240	AtRLP45_RLP45__receptor like protein 45
OG0001832	AT5G49290	ATRLP56_RLP56__receptor like protein 56
OG0001864	AT1G68580	agenet domain-containing protein / bromo-adjacent homology (BAH) domain-containing protein
OG0001864	AT5G55600	agenet domain-containing protein / bromo-adjacent homology (BAH) domain-containing protein
OG0001919	AT1G09812
OG0001919	AT1G11120
OG0001919	AT1G58007
OG0001919	AT4G28170
OG0001923	AT4G19720	Glycosyl hydrolase family protein with chitinase insertion domain
OG0001923	AT4G19730	Glycosyl hydrolase superfamily protein
OG0001923	AT4G19740	Glycosyl hydrolase superfamily protein
OG0001923	AT4G19750	Glycosyl hydrolase family protein with chitinase insertion domain
OG0001923	AT4G19760	Glycosyl hydrolase family protein with chitinase insertion domain
OG0001923	AT4G19770	Glycosyl hydrolase family protein with chitinase insertion domain
OG0001923	AT4G19800	Glycosyl hydrolase family protein with chitinase insertion domain
OG0001923	AT4G19810	ChiC__Glycosyl hydrolase family protein with chitinase insertion domain
OG0001923	AT4G19820	Glycosyl hydrolase family protein with chitinase insertion domain
OG0001961	AT2G38070	OPL2__Protein of unknown function (DUF740)
OG0001961	AT3G09070	OPS__Protein of unknown function (DUF740)
OG0001961	AT3G46990	OPL3__Protein of unknown function (DUF740)
OG0001961	AT5G01170	OPL1__Protein of unknown function (DUF740)
OG0001961	AT5G58930	OPL4__Protein of unknown function (DUF740)
OG0001999	AT1G19160	F-box family protein
OG0001999	AT1G26510	F-box associated ubiquitination effector family protein
OG0001999	AT1G26515	F-box and associated interaction domains-containing protein
OG0001999	AT1G30790	F-box and associated interaction domains-containing protein
OG0001999	AT1G30920	F-box family protein
OG0001999	AT1G30925	phospholipase Cs
OG0001999	AT1G30930	F-box family protein
OG0001999	AT1G31000	F-box and associated interaction domains-containing protein
OG0001999	AT1G31080	F-box family protein
OG0001999	AT1G31090	F-box family protein
OG0001999	AT1G32420	F-box and associated interaction domains-containing protein
OG0001999	AT1G32660	F-box and associated interaction domains-containing protein
OG0001999	AT1G33010	F-box and associated interaction domains-containing protein
OG0001999	AT1G33020	F-box and associated interaction domains-containing protein
OG0001999	AT1G46840	F-box family protein
OG0001999	AT1G46912	F-box associated ubiquitination effector family protein
OG0001999	AT1G46984	F-box family protein
OG0001999	AT1G47300	F-box family protein
OG0001999	AT1G47340	F-box and associated interaction domains-containing protein
OG0001999	AT1G47350	F-box associated ubiquitination effector family protein
OG0001999	AT1G47730	F-box and associated interaction domains-containing protein
OG0001999	AT1G47765	F-box and associated interaction domains-containing protein
OG0001999	AT1G47790	F-box and associated interaction domains-containing protein
OG0001999	AT1G47800	F-box and associated interaction domains-containing protein
OG0001999	AT1G47810	F-box and associated interaction domains-containing protein
OG0001999	AT1G48060	F-box and associated interaction domains-containing protein
OG0001999	AT1G50870	F-box and associated interaction domains-containing protein
OG0001999	AT1G53360	F-box associated ubiquitination effector family protein
OG0001999	AT1G53370	F-box and associated interaction domains-containing protein
OG0001999	AT1G53550	F-box family protein
OG0001999	AT1G53790	F-box and associated interaction domains-containing protein
OG0001999	AT1G53815	F-box family protein
OG0001999	AT1G55070	F-box and associated interaction domains-containing protein
OG0001999	AT1G55947
OG0001999	AT1G60370	KUK__F-box and associated interaction domains-containing protein
OG0001999	AT1G61060	F-box family protein
OG0001999	AT1G67130	F-box family protein
OG0001999	AT2G02660	F-box associated ubiquitination effector family protein
OG0001999	AT2G02890	F-box family protein
OG0001999	AT2G15640	F-box family protein
OG0001999	AT2G16220	F-box and associated interaction domains-containing protein
OG0001999	AT2G16450	F-box and associated interaction domains-containing protein
OG0001999	AT2G16810	F-box and associated interaction domains-containing protein
OG0001999	AT2G19630	F-box and associated interaction domains-containing protein
OG0001999	AT2G21930	F-box associated ubiquitination effector family protein
OG0001999	AT2G23160	F-box family protein
OG0001999	AT2G31470	DOR__F-box and associated interaction domains-containing protein
OG0001999	AT2G40910	F-box and associated interaction domains-containing protein
OG0001999	AT2G40920	F-box and associated interaction domains-containing protein
OG0001999	AT2G40925	F-box and associated interaction domains-containing protein
OG0001999	AT3G04660	F-box and associated interaction domains-containing protein
OG0001999	AT3G10240	F-box and associated interaction domains-containing protein
OG0001999	AT3G10990	F-box associated ubiquitination effector family protein
OG0001999	AT3G23960	F-box and associated interaction domains-containing protein
OG0001999	AT3G47030	F-box and associated interaction domains-containing protein
OG0001999	AT3G47130	F-box associated ubiquitination effector family protein
OG0001999	AT3G47140	F-box associated ubiquitination effector family protein
OG0001999	AT3G47150	F-box and associated interaction domains-containing protein
OG0001999	AT3G49440	F-box associated ubiquitination effector family protein
OG0001999	AT3G49450	F-box and associated interaction domains-containing protein
OG0001999	AT3G52320	F-box and associated interaction domains-containing protein
OG0001999	AT3G52330	F-box associated ubiquitination effector family protein
OG0001999	AT3G52510	F-box associated ubiquitination effector family protein
OG0001999	AT3G56890	F-box associated ubiquitination effector family protein
OG0001999	AT3G57580	F-box and associated interaction domains-containing protein
OG0001999	AT3G57590	F-box and associated interaction domains-containing protein
OG0001999	AT3G61340	F-box and associated interaction domains-containing protein
OG0001999	AT4G09190	F-box and associated interaction domains-containing protein
OG0001999	AT4G11590	F-box associated ubiquitination effector family protein
OG0001999	AT4G13060	F-box associated ubiquitination effector family protein
OG0001999	AT4G19930	F-box and associated interaction domains-containing protein
OG0001999	AT4G19940	F-box and associated interaction domains-containing protein
OG0001999	AT4G21240	F-box and associated interaction domains-containing protein
OG0001999	AT4G38870	F-box and associated interaction domains-containing protein
OG0001999	AT5G15660	F-box and associated interaction domains-containing protein
OG0001999	AT5G15670	F-box family protein
OG0001999	AT5G18160	F-box and associated interaction domains-containing protein
OG0001999	AT5G38810	F-box and associated interaction domains-containing protein
OG0001999	AT5G42430	F-box and associated interaction domains-containing protein
OG0001999	AT5G44220	F-box family protein
OG0001999	AT5G52610	F-box and associated interaction domains-containing protein
OG0001999	AT5G52620	F-box associated ubiquitination effector family protein
OG0001999	AT5G62510	F-box family protein
OG0001999	AT5G62660	F-box and associated interaction domains-containing protein
OG0001999	AT5G65850	F-box and associated interaction domains-containing protein
OG0002004	AT4G21700	Protein of unknown function (DUF2921)
OG0002005	AT1G27040	AtNPF4.5_NPF4.5__Major facilitator superfamily protein
OG0002005	AT1G69850	AIT1_AtNPF4.6_ATNRT1:2_NPF4.6_NRT1.2_NRT1:2_NTL1__nitrate transporter 1:2
OG0002005	AT3G25260	AtNPF4.1_NPF4.1__Major facilitator superfamily protein
OG0002005	AT3G25280	AtNPF4.2_NPF4.2__Major facilitator superfamily protein
OG0002005	AT5G62730	Major facilitator superfamily protein
OG0002014	AT4G40020	Myosin heavy chain-related protein
OG0002019	AT3G22430
OG0002035	AT4G21920
OG0002038	AT2G17040	anac036_NAC036__NAC domain containing protein 36
OG0002042	AT1G66500	Pre-mRNA cleavage complex II
OG0002042	AT2G36480	ENTH/VHS family protein
OG0002042	AT4G04885	PCFS4__PCF11P-similar protein 4
OG0002042	AT5G43620	Pre-mRNA cleavage complex II
OG0002047	AT1G61680	ATTPS14_TPS14__terpene synthase 14
OG0002062	AT2G14690	Glycosyl hydrolase superfamily protein
OG0002062	AT4G33810	Glycosyl hydrolase superfamily protein
OG0002062	AT4G33820	Glycosyl hydrolase superfamily protein
OG0002062	AT4G33830	Glycosyl hydrolase family 10 protein
OG0002062	AT4G33840	Glycosyl hydrolase family 10 protein
OG0002062	AT4G33860	Glycosyl hydrolase family 10 protein
OG0002073	AT2G28080	UDP-Glycosyltransferase superfamily protein
OG0002073	AT2G36970	UDP-Glycosyltransferase superfamily protein
OG0002083	AT2G09990	Ribosomal protein S5 domain 2-like superfamily protein
OG0002083	AT3G04230	Ribosomal protein S5 domain 2-like superfamily protein
OG0002083	AT5G18380	Ribosomal protein S5 domain 2-like superfamily protein
OG0002085	AT3G20980	Gag-Pol-related retrotransposon family protein
OG0002085	AT3G21000	Gag-Pol-related retrotransposon family protein
OG0002088	AT1G10588	Gibberellin-regulated family protein
OG0002088	AT2G14900	Gibberellin-regulated family protein
OG0002088	AT2G39540	Gibberellin-regulated family protein
OG0002088	AT5G59845	GASA10__Gibberellin-regulated family protein
OG0002094	AT3G52060	AtGnTL_GnTL__Core-2/I-branching beta-1,6-N-acetylglucosaminyltransferase family protein
OG0002094	AT4G32290	Core-2/I-branching beta-1,6-N-acetylglucosaminyltransferase family protein
OG0002094	AT5G22070	Core-2/I-branching beta-1,6-N-acetylglucosaminyltransferase family protein
OG0002094	AT5G25330	Core-2/I-branching beta-1,6-N-acetylglucosaminyltransferase family protein
OG0002114	AT2G36870	AtXTH32_XTH32__xyloglucan endotransglucosylase/hydrolase 32
OG0002114	AT3G44990	AtXTH31_ATXTR8_XTH31_XTR8__xyloglucan endo-transglycosylase-related 8
OG0002141	AT1G64140
OG0002149	AT2G26770	SCAB1__plectin-related
OG0002149	AT2G40820
OG0002149	AT3G56480	SCAB3__myosin heavy chain-related
OG0002170	AT1G56320
OG0002170	AT5G49350	Glycine-rich protein family
OG0002173	AT1G23810	Paired amphipathic helix (PAH2) superfamily protein
OG0002173	AT1G24200	Paired amphipathic helix (PAH2) superfamily protein
OG0002173	AT1G24210	Paired amphipathic helix (PAH2) superfamily protein
OG0002173	AT1G24230	Paired amphipathic helix (PAH2) superfamily protein
OG0002173	AT1G24250	Paired amphipathic helix (PAH2) superfamily protein
OG0002173	AT1G27220	paired amphipathic helix repeat-containing protein
OG0002173	AT1G27240	Paired amphipathic helix (PAH2) superfamily protein
OG0002173	AT1G27250	Paired amphipathic helix (PAH2) superfamily protein
OG0002173	AT1G27260	Paired amphipathic helix (PAH2) superfamily protein
OG0002173	AT1G27270	Paired amphipathic helix (PAH2) superfamily protein
OG0002173	AT1G27280	Paired amphipathic helix (PAH2) superfamily protein
OG0002173	AT1G70030	Paired amphipathic helix (PAH2) superfamily protein
OG0002173	AT5G15025
OG0002173	AT5G15030	Paired amphipathic helix (PAH2) superfamily protein
OG0002173	AT5G15040	Paired amphipathic helix (PAH2) superfamily protein
OG0002173	AT5G35610	Paired amphipathic helix (PAH2) superfamily protein
OG0002179	AT2G18360	alpha/beta-Hydrolases superfamily protein
OG0002179	AT4G36610	alpha/beta-Hydrolases superfamily protein
OG0002185	AT2G02160	AtC3H17_C3H17__CCCH-type zinc finger family protein
OG0002198	ATCG00190	RPOB__RNA polymerase subunit beta
OG0002219	AT4G14746
OG0002253	AT1G19715	Mannose-binding lectin superfamily protein
OG0002253	AT1G33790	jacalin lectin family protein
OG0002253	AT1G52040	ATMBP_MBP1__myrosinase-binding protein 1
OG0002253	AT1G52050	Mannose-binding lectin superfamily protein
OG0002253	AT1G52100	Mannose-binding lectin superfamily protein
OG0002253	AT1G60095	Mannose-binding lectin superfamily protein
OG0002253	AT1G73040	Mannose-binding lectin superfamily protein
OG0002253	AT2G25980	Mannose-binding lectin superfamily protein
OG0002253	AT2G39310	JAL22__jacalin-related lectin 22
OG0002253	AT2G39330	JAL23__jacalin-related lectin 23
OG0002253	AT3G16420	JAL30_PBP1_PBPI__PYK10-binding protein 1
OG0002253	AT3G16430	JAL31_PBPII__jacalin-related lectin 31
OG0002253	AT3G16440	ATMLP-300B_MEE36_MLP-300B__myrosinase-binding protein-like protein-300B
OG0002253	AT3G16450	JAL33__Mannose-binding lectin superfamily protein
OG0002253	AT3G21380	Mannose-binding lectin superfamily protein
OG0002259	AT1G15385
OG0002259	AT2G26110	Protein of unknown function (DUF761)
OG0002259	AT4G26130
OG0002259	AT5G56980
OG0002263	AT1G01695	TRM33__Phosphatidylinositol N-acetyglucosaminlytransferase subunit P-related
OG0002263	AT1G63670	TRM12__Protein of unknown function (DUF3741)
OG0002263	AT2G45900	TRM13__Phosphatidylinositol N-acetyglucosaminlytransferase subunit P-related
OG0002263	AT3G61380	TRM14__Phosphatidylinositol N-acetyglucosaminlytransferase subunit P-related
OG0002263	AT4G00440	TRM15__Protein of unknown function (DUF3741)
OG0002266	AT2G19580	TET2__tetraspanin2
OG0002266	AT5G46700	TET1_TRN2__Tetraspanin family protein
OG0002274	AT4G12070
OG0002286	AT1G13940	Plant protein of unknown function (DUF863)
OG0002286	AT1G26620	Plant protein of unknown function (DUF863)
OG0002286	AT1G69360	Plant protein of unknown function (DUF863)
OG0002286	AT5G07790
OG0002288	AT1G31310	hydroxyproline-rich glycoprotein family protein
OG0002288	AT2G35640	Homeodomain-like superfamily protein
OG0002301	AT1G08590	ATPXL1_PXL1__Leucine-rich receptor-like protein kinase family protein
OG0002301	AT4G28650	MIK1_PXL2__Leucine-rich repeat transmembrane protein kinase family protein
OG0002301	AT5G61480	PXY_TDR__Leucine-rich repeat protein kinase family protein
OG0002305	AT1G13340	ISTL6__Regulator of Vps4 activity in the MVB pathway protein
OG0002330	AT1G23060	MDP40
OG0002330	AT1G24160
OG0002330	AT1G70100
OG0002330	AT1G70950	TPX2 (targeting protein for Xklp2) protein family
OG0002330	AT3G01710	TPX2 (targeting protein for Xklp2) protein family
OG0002330	AT3G26050	TPX2 (targeting protein for Xklp2) protein family
OG0002330	AT3G27350
OG0002330	AT5G40700
OG0002342	AT1G20070
OG0002342	AT2G25250
OG0002342	AT3G21570
OG0002342	AT4G02040
OG0002342	AT4G32020
OG0002347	AT3G45650	AtNPF2.7_NAXT1_NPF2.7__nitrate excretion transporter1
OG0002347	AT3G45660	Major facilitator superfamily protein
OG0002347	AT3G45680	NPF2.3__Major facilitator superfamily protein
OG0002347	AT3G45690	Major facilitator superfamily protein
OG0002347	AT3G45700	NPF2.4__Major facilitator superfamily protein
OG0002347	AT3G45710	NPF2.5__Major facilitator superfamily protein
OG0002347	AT3G45720	Major facilitator superfamily protein
OG0002356	AT1G65010	Plant protein of unknown function (DUF827)
OG0002356	AT3G02930	Plant protein of unknown function (DUF827)
OG0002356	AT4G27595	Plant protein of unknown function (DUF827)
OG0002356	AT5G16730	Plant protein of unknown function (DUF827)
OG0002364	AT1G43770	RING/FYVE/PHD zinc finger superfamily protein
OG0002378	AT1G28290	AGP31__arabinogalactan protein 31
OG0002378	AT2G33790	AGP30_ATAGP30__arabinogalactan protein 30
OG0002378	AT2G34700	Pollen Ole e 1 allergen and extensin family protein
OG0002383	AT4G33420	Prx47__Peroxidase superfamily protein
OG0002383	AT5G42180	PER64_PRX64__Peroxidase superfamily protein
OG0002383	AT5G51890	Prx66__Peroxidase superfamily protein
OG0002385	AT3G28020
OG0002385	AT3G48770	DNA binding;ATP binding
OG0002396	AT2G17770	ATBZIP27_BZIP27_FDP__basic region/leucine zipper motif 27
OG0002396	AT4G35900	atbzip14_FD_FD-1__Basic-leucine zipper (bZIP) transcription factor family protein
OG0002397	AT2G28140	Protein of unknown function (DUF1635)
OG0002397	AT2G28690	Protein of unknown function (DUF1635)
OG0002397	AT3G44940	Protein of unknown function (DUF1635)
OG0002397	AT5G09940	Protein of unknown function (DUF1635)
OG0002397	AT5G22930	Protein of unknown function (DUF1635)
OG0002397	AT5G59760	Protein of unknown function (DUF1635)
OG0002398	AT4G31805	POLAR__WRKY family transcription factor
OG0002398	AT5G10890	myosin heavy chain-related
OG0002416	AT1G07330
OG0002416	AT2G29620
OG0002416	AT5G17910
OG0002416	AT5G58880
OG0002435	AT1G15760	Sterile alpha motif (SAM) domain-containing protein
OG0002435	AT1G80520	Sterile alpha motif (SAM) domain-containing protein
OG0002435	AT2G12462
OG0002438	AT1G47670	Transmembrane amino acid transporter family protein
OG0002438	AT4G35180	LHT7__LYS/HIS transporter 7
OG0002441	AT1G48325	Expressed protein
OG0002441	AT3G05858
OG0002441	AT5G26620
OG0002456	AT4G34139
OG0002474	AT1G01550	BPS1__Protein of unknown function (DUF793)
OG0002474	AT2G46080	BPS2
OG0002474	AT3G61500
OG0002474	AT4G01360	BPS3
OG0002477	AT4G15140
OG0002499	AT1G11620	F-box and associated interaction domains-containing protein
OG0002499	AT1G24800	F-box family protein
OG0002499	AT1G24881	F-box family protein
OG0002499	AT1G25055	F-box family protein
OG0002499	AT1G25150	F-box family protein
OG0002499	AT1G25211	F-box family protein
OG0002499	AT1G31510	F-box associated ubiquitination effector family protein
OG0002499	AT1G32140	F-box family protein
OG0002499	AT1G54550	F-box and associated interaction domains-containing protein
OG0002499	AT1G62270	F-box and associated interaction domains-containing protein
OG0002499	AT1G66490	F-box and associated interaction domains-containing protein
OG0002499	AT1G77650	F-box associated ubiquitination effector family protein
OG0002499	AT2G04920	F-box and associated interaction domains-containing protein
OG0002499	AT2G07140	F-box and associated interaction domains-containing protein
OG0002499	AT2G18780	F-box and associated interaction domains-containing protein
OG0002499	AT2G27520	F-box and associated interaction domains-containing protein
OG0002499	AT2G38590	F-box and associated interaction domains-containing protein
OG0002499	AT3G04250	F-box associated ubiquitination effector family protein
OG0002499	AT3G08750	F-box and associated interaction domains-containing protein
OG0002499	AT3G10430	F-box and associated interaction domains-containing protein
OG0002499	AT3G13680	F-box and associated interaction domains-containing protein
OG0002499	AT3G13820	F-box and associated interaction domains-containing protein
OG0002499	AT3G16740	FOA2__F-box and associated interaction domains-containing protein
OG0002499	AT3G17265	F-box and associated interaction domains-containing protein
OG0002499	AT3G17270	F-box family protein
OG0002499	AT3G17280	F-box and associated interaction domains-containing protein
OG0002499	AT3G17320	FOA1__F-box and associated interaction domains-containing protein
OG0002499	AT3G17400	F-box family protein
OG0002499	AT3G17480	F-box and associated interaction domains-containing protein
OG0002499	AT3G17490	F-box and associated interaction domains-containing protein
OG0002499	AT3G17500	F-box family protein
OG0002499	AT3G17530	F-box and associated interaction domains-containing protein
OG0002499	AT3G17540	F-box and associated interaction domains-containing protein
OG0002499	AT3G17560	F-box and associated interaction domains-containing protein
OG0002499	AT3G17570	F-box and associated interaction domains-containing protein
OG0002499	AT3G17620	F-box and associated interaction domains-containing protein
OG0002499	AT3G18330	F-box family protein
OG0002499	AT3G18905
OG0002499	AT3G18910	ETP2__EIN2 targeting protein2
OG0002499	AT3G18980	ETP1__EIN2 targeting protein1
OG0002499	AT3G19410	F-box and associated interaction domains-containing protein
OG0002499	AT3G19560	F-box family protein
OG0002499	AT3G19880	F-box and associated interaction domains-containing protein
OG0002499	AT3G19890	F-box family protein
OG0002499	AT3G20030	F-box and associated interaction domains-containing protein
OG0002499	AT3G21120	F-box and associated interaction domains-containing protein
OG0002499	AT3G21130	F-box and associated interaction domains-containing protein
OG0002499	AT3G21170	F-box and associated interaction domains-containing protein
OG0002499	AT3G22350	F-box and associated interaction domains-containing protein
OG0002499	AT3G22421	F-box and associated interaction domains-containing protein
OG0002499	AT3G22650	ATSFL61_CEG_SFL61__F-box and associated interaction domains-containing protein
OG0002499	AT3G22700	F-box and associated interaction domains-containing protein
OG0002499	AT3G22710	F-box family protein
OG0002499	AT3G22720	F-box and associated interaction domains-containing protein
OG0002499	AT3G22730	F-box and associated interaction domains-containing protein
OG0002499	AT3G22870	F-box and associated interaction domains-containing protein
OG0002499	AT3G22940	F-box associated ubiquitination effector family protein
OG0002499	AT3G23260	F-box and associated interaction domains-containing protein
OG0002499	AT3G23685	F-box associated ubiquitination effector family protein
OG0002499	AT3G24700	F-box and associated interaction domains-containing protein
OG0002499	AT3G25460	F-box and associated interaction domains-containing protein
OG0002499	AT3G44120	F-box and associated interaction domains-containing protein
OG0002499	AT3G49510	F-box family protein
OG0002499	AT3G49520	F-box and associated interaction domains-containing protein
OG0002499	AT3G49980	F-box and associated interaction domains-containing protein
OG0002499	AT4G04690	F-box and associated interaction domains-containing protein
OG0002499	AT4G09870	F-box and associated interaction domains-containing protein
OG0002499	AT4G10190	F-box and associated interaction domains-containing protein
OG0002499	AT4G10740	F-box and associated interaction domains-containing protein
OG0002499	AT4G17200	F-box and associated interaction domains-containing protein
OG0002499	AT4G33290	F-box and associated interaction domains-containing protein
OG0002499	AT5G36730	F-box and associated interaction domains-containing protein
OG0002499	AT5G36820	F-box and associated interaction domains-containing protein
OG0002499	AT5G41490	F-box associated ubiquitination effector family protein
OG0002499	AT5G41500	F-box and associated interaction domains-containing protein
OG0002499	AT5G41510	F-box and associated interaction domains-containing protein
OG0002499	AT5G47300	F-box and associated interaction domains-containing protein
OG0002499	AT5G51000	F-box and associated interaction domains-containing protein
OG0002499	AT5G60560	F-box and associated interaction domains-containing protein
OG0002500	AT2G21490	LEA__dehydrin LEA
OG0002500	AT4G39130	Dehydrin family protein
OG0002502	AT1G78780	pathogenesis-related family protein
OG0002505	AT1G12060	ATBAG5_BAG5__BCL-2-associated athanogene 5
OG0002523	AT3G51940
OG0002523	AT5G03990
OG0002531	AT3G01750	Ankyrin repeat family protein
OG0002531	AT3G04140	Ankyrin repeat family protein
OG0002540	AT1G01150	Homeodomain-like protein with RING/FYVE/PHD-type zinc finger domain
OG0002540	AT1G14770	RING/FYVE/PHD zinc finger superfamily protein
OG0002540	AT1G68030	RING/FYVE/PHD zinc finger superfamily protein
OG0002540	AT4G12670	Homeodomain-like superfamily protein
OG0002540	AT5G03780	TRFL10__TRF-like 10
OG0002545	AT5G14360	Ubiquitin-like superfamily protein
OG0002545	AT5G40630	Ubiquitin-like superfamily protein
OG0002555	AT1G32120
OG0002555	AT1G48145
OG0002555	AT1G50745
OG0002555	AT1G50750	Plant mobile domain protein family
OG0002555	AT1G50770	Aminotransferase-like, plant mobile domain family protein
OG0002555	AT1G50790	Plant mobile domain protein family
OG0002555	AT1G50820	Aminotransferase-like, plant mobile domain family protein
OG0002555	AT1G50830	Aminotransferase-like, plant mobile domain family protein
OG0002555	AT1G51538	Aminotransferase-like, plant mobile domain family protein
OG0002555	AT3G32280	ATP-dependent helicase family protein
OG0002555	AT4G16050	Aminotransferase-like, plant mobile domain family protein
OG0002555	AT5G18510	Aminotransferase-like, plant mobile domain family protein
OG0002558	AT1G08860	BON3__Calcium-dependent phospholipid-binding Copine family protein
OG0002558	AT5G07300	BON2__Calcium-dependent phospholipid-binding Copine family protein
OG0002558	AT5G61900	BON_BON1_CPN1__Calcium-dependent phospholipid-binding Copine family protein
OG0002558	AT5G61910	DCD (Development and Cell Death) domain protein
OG0002578	AT5G25250	FLOT1__SPFH/Band 7/PHB domain-containing membrane-associated protein family
OG0002578	AT5G25260	SPFH/Band 7/PHB domain-containing membrane-associated protein family
OG0002578	AT5G64870	SPFH/Band 7/PHB domain-containing membrane-associated protein family
OG0002588	AT2G15320	Leucine-rich repeat (LRR) family protein
OG0002588	AT3G59510	Leucine-rich repeat (LRR) family protein
OG0002588	AT5G66330	Leucine-rich repeat (LRR) family protein
OG0002595	AT1G32640	ATMYC2_JAI1_JIN1_MYC2_RD22BP1_ZBF1__Basic helix-loop-helix (bHLH) DNA-binding family protein
OG0002595	AT4G17880	MYC4__Basic helix-loop-helix (bHLH) DNA-binding family protein
OG0002595	AT5G46760	MYC3__Basic helix-loop-helix (bHLH) DNA-binding family protein
OG0002595	AT5G46830	ATNIG1_bhlh28_MYC5_NIG1__NACL-inducible gene 1
OG0002600	AT1G05490	chr31__chromatin remodeling 31
OG0002600	AT3G24340	CHR40__chromatin remodeling 40
OG0002601	AT1G66100	Plant thionin
OG0002601	AT1G72260	THI2.1_THI2.1.1__thionin 2.1
OG0002601	AT2G15010	Plant thionin
OG0002601	AT5G36910	THI2.2__thionin 2.2
OG0002618	AT1G77330	ACO5__2-oxoglutarate (2OG) and Fe(II)-dependent oxygenase superfamily protein
OG0002628	AT1G32910	HXXXD-type acyl-transferase family protein
OG0002628	AT1G78990	HXXXD-type acyl-transferase family protein
OG0002628	AT5G16410	HXXXD-type acyl-transferase family protein
OG0002633	AT5G49960
OG0002662	AT1G14780	MAC/Perforin domain-containing protein
OG0002686	AT1G52780	Protein of unknown function (DUF2921)
OG0002720	AT1G29770	Haloacid dehalogenase-like hydrolase (HAD) superfamily protein
OG0002720	AT1G29780	Haloacid dehalogenase-like hydrolase (HAD) superfamily protein
OG0002720	AT5G45700	Haloacid dehalogenase-like hydrolase (HAD) superfamily protein
OG0002727	AT3G10640	VPS60.1__SNF7 family protein
OG0002727	AT5G04850	VPS60.2__SNF7 family protein
OG0002735	AT1G10220
OG0002735	AT1G59590	ZCF37__ZCF37
OG0002738	AT2G42140	VQ motif-containing protein
OG0002738	AT2G44340	VQ motif-containing protein
OG0002738	AT3G58000	VQ motif-containing protein
OG0002738	AT3G60090	VQ motif-containing protein
OG0002772	AT1G55910	ZIP11__zinc transporter 11 precursor
OG0002772	AT5G59520	AtZIP2_ZIP2__ZRT/IRT-like protein 2
OG0002776	AT3G44350	anac061_NAC061__NAC domain containing protein 61
OG0002776	AT5G22380	anac090_NAC090__NAC domain containing protein 90
OG0002784	AT4G16162	Leucine-rich repeat (LRR) family protein
OG0002785	ATCG00170	RPOC2__DNA-directed RNA polymerase family protein
OG0002818	AT3G45900	Ribonuclease P protein subunit P38-related
OG0002818	AT5G53020	Ribonuclease P protein subunit P38-related
OG0002843	AT2G38170	ATCAX1_CAX1_RCI4__cation exchanger 1
OG0002843	AT3G51860	ATCAX3_ATHCX1_CAX1-LIKE_CAX3__cation exchanger 3
OG0002843	AT5G01490	ATCAX4_CAX4__cation exchanger 4
OG0002856	AT3G02080	Ribosomal protein S19e family protein
OG0002856	AT5G15520	Ribosomal protein S19e family protein
OG0002856	AT5G61170	Ribosomal protein S19e family protein
OG0002866	AT1G54200	BG3
OG0002866	AT3G13980	BG4
OG0002866	AT3G42800
OG0002866	AT5G12050	BG1
OG0002873	AT5G43490
OG0002873	AT5G48610
OG0002886	AT1G31470	NFD4__Major facilitator superfamily protein
OG0002886	AT3G01630	Major facilitator superfamily protein
OG0002886	AT4G19450	Major facilitator superfamily protein
OG0002886	AT5G45275	Major facilitator superfamily protein
OG0002894	AT3G60380
OG0002894	AT4G16790	hydroxyproline-rich glycoprotein family protein
OG0002905	AT1G06630	F-box/RNI-like superfamily protein
OG0002905	AT1G19070	F-box family protein
OG0002905	AT1G21990	F-box/RNI-like/FBD-like domains-containing protein
OG0002905	AT1G47915	F-box family protein
OG0002905	AT1G47920	RNI-like superfamily protein
OG0002905	AT1G48390	RNI-like superfamily protein
OG0002905	AT1G48400	F-box/RNI-like/FBD-like domains-containing protein
OG0002905	AT1G52650	F-box/RNI-like superfamily protein
OG0002905	AT1G58310	F-box/RNI-like superfamily protein
OG0002905	AT1G64540	F-box/FBD-like domains containing protein
OG0002905	AT2G29910	F-box/RNI-like superfamily protein
OG0002905	AT2G29930	F-box/RNI-like superfamily protein
OG0002905	AT2G42720	FBD, F-box, Skp2-like and Leucine Rich Repeat domains containing protein
OG0002905	AT2G42730	F-box family protein
OG0002905	AT3G03030	F-box/RNI-like superfamily protein
OG0002905	AT3G03040	F-box/RNI-like superfamily protein
OG0002905	AT3G42770	F-box/RNI-like/FBD-like domains-containing protein
OG0002905	AT3G44810	F-box family protein
OG0002905	AT3G49150	F-box/RNI-like superfamily protein
OG0002905	AT3G54160	RNI-like superfamily protein
OG0002905	AT3G58820	F-box/RNI-like superfamily protein
OG0002905	AT3G58860	F-box/RNI-like superfamily protein
OG0002905	AT3G58880	F-box/RNI-like superfamily protein
OG0002905	AT3G58900	F-box/RNI-like superfamily protein
OG0002905	AT3G58920	F-box/RNI-like superfamily protein
OG0002905	AT3G58930	F-box/RNI-like superfamily protein
OG0002905	AT3G58940	F-box/RNI-like superfamily protein
OG0002905	AT3G58950	F-box/RNI-like superfamily protein
OG0002905	AT3G58960	F-box/RNI-like/FBD-like domains-containing protein
OG0002905	AT3G58980	F-box family protein
OG0002905	AT3G59000	F-box/RNI-like superfamily protein
OG0002905	AT3G59150	F-box/RNI-like superfamily protein
OG0002905	AT3G59160	F-box/RNI-like superfamily protein
OG0002905	AT3G59170	F-box/RNI-like superfamily protein
OG0002905	AT3G59180	Protein with RNI-like/FBD-like domains
OG0002905	AT3G59190	F-box/RNI-like superfamily protein
OG0002905	AT3G59200	F-box/RNI-like superfamily protein
OG0002905	AT3G59210	F-box/RNI-like superfamily protein
OG0002905	AT3G59230	RNI-like superfamily protein
OG0002905	AT3G59240	RNI-like superfamily protein
OG0002905	AT3G59250	F-box/RNI-like superfamily protein
OG0002905	AT3G60040	F-box family protein
OG0002905	AT3G62430	Protein with RNI-like/FBD-like domains
OG0002905	AT3G62440	SAF1__F-box/RNI-like superfamily protein
OG0002905	AT4G00320	F-box/RNI-like superfamily protein
OG0002905	AT4G13960	F-box/RNI-like superfamily protein
OG0002905	AT4G14096	F-box/RNI-like superfamily protein
OG0002905	AT4G14103	F-box/RNI-like superfamily protein
OG0002905	AT4G22280	F-box/RNI-like superfamily protein
OG0002905	AT4G27050	F-box/RNI-like superfamily protein
OG0002905	AT5G15620	F-box/RNI-like superfamily protein
OG0002905	AT5G25860	F-box/RNI-like superfamily protein
OG0002905	AT5G35995	F-box/RNI-like superfamily protein
OG0002905	AT5G38386	F-box/RNI-like superfamily protein
OG0002905	AT5G38390	F-box/RNI-like superfamily protein
OG0002905	AT5G38392
OG0002905	AT5G38396	F-box/RNI-like superfamily protein
OG0002905	AT5G41630	F-box/RNI-like superfamily protein
OG0002905	AT5G41830	RNI-like superfamily protein
OG0002905	AT5G41840	F-box/RNI-like superfamily protein
OG0002919	AT1G13050
OG0002919	AT3G26350
OG0002919	AT4G26490	Late embryogenesis abundant (LEA) hydroxyproline-rich glycoprotein family
OG0002919	AT5G56050
OG0002919	AT5G56070
OG0002921	AT1G59850	ARM repeat superfamily protein
OG0002921	AT5G62580	ARM repeat superfamily protein
OG0002931	AT1G71800	CSTF64__cleavage stimulating factor 64
OG0002954	AT5G08430	SWIB/MDM2 domain;Plus-3;GYF
OG0002954	AT5G23480	SWIB/MDM2 domain;Plus-3;GYF
OG0002954	AT5G63700	zinc ion binding;DNA binding
OG0002958	AT2G25640	SPOC domain / Transcription elongation factor S-II protein
OG0002958	AT2G42725
OG0002958	AT3G29639
OG0002958	AT4G18720	Transcription factor IIS protein
OG0002958	AT5G11430	SPOC domain / Transcription elongation factor S-II protein
OG0002958	AT5G25520	SPOC domain / Transcription elongation factor S-II protein
OG0002958	AT5G42325	Transcription factor IIS protein
OG0002974	AT3G47510
OG0002975	AT1G10400	UDP-Glycosyltransferase superfamily protein
OG0002975	AT2G16890	UDP-Glycosyltransferase superfamily protein
OG0002975	AT5G14860	UDP-Glycosyltransferase superfamily protein
OG0002977	AT2G40113	Pollen Ole e 1 allergen and extensin family protein
OG0002977	AT4G17215	Pollen Ole e 1 allergen and extensin family protein
OG0002977	AT5G15780	Pollen Ole e 1 allergen and extensin family protein
OG0002977	AT5G47635	Pollen Ole e 1 allergen and extensin family protein
OG0003007	AT3G03380	DEG7_DegP7__DegP protease 7
OG0003017	AT2G07727	Di-haem cytochrome, transmembrane;Cytochrome b/b6, C-terminal
OG0003017	ATCG00720	PETB__photosynthetic electron transfer B
OG0003017	ATMG00220	COB__apocytochrome b
OG0003029	AT1G13650
OG0003029	AT2G03810	18S pre-ribosomal assembly protein gar2-related
OG0003040	AT1G27520	MNS5__Glycosyl hydrolase family 47 protein
OG0003040	AT5G43710	MNS4__Glycosyl hydrolase family 47 protein
OG0003051	AT5G61820
OG0003059	AT1G63310
OG0003059	AT1G75260	oxidoreductases, acting on NADH or NADPH
OG0003059	AT2G46630
OG0003059	AT4G00890	proline-rich family protein
OG0003062	AT1G05410	Protein of unknown function (DUF1423)
OG0003063	AT2G41475	ATS3A__Embryo-specific protein 3, (ATS3)
OG0003063	AT5G07190	ATS3__seed gene 3
OG0003063	AT5G62200	ATS3B__Embryo-specific protein 3, (ATS3)
OG0003063	AT5G62210	Embryo-specific protein 3, (ATS3)
OG0003081	AT2G44600
OG0003081	AT3G60200
OG0003090	AT3G14280
OG0003097	AT5G05190	EDR4__Protein of unknown function (DUF3133)
OG0003099	AT2G38800	Plant calmodulin-binding protein-related
OG0003099	AT3G54570	Plant calmodulin-binding protein-related
OG0003099	AT5G04020	calmodulin binding
OG0003149	ATCG00280	PSBC__photosystem II reaction center protein C
OG0003154	AT4G31330	Protein of unknown function, DUF599
OG0003154	AT5G10580	Protein of unknown function, DUF599
OG0003154	AT5G24790	Protein of unknown function, DUF599
OG0003155	AT1G14660	ATNHX8_NHX8_NHX8__Na+/H+ exchanger 8
OG0003155	AT2G01980	ATNHX7_ATSOS1_SOS1__sodium proton exchanger, putative (NHX7) (SOS1)
OG0003165	AT2G23540	GDSL-like Lipase/Acylhydrolase superfamily protein
OG0003165	AT3G50400	GDSL-like Lipase/Acylhydrolase superfamily protein
OG0003165	AT4G16230	GDSL-like Lipase/Acylhydrolase superfamily protein
OG0003165	AT4G16233
OG0003168	AT1G22310	ATMBD8_MBD8__methyl-CPG-binding domain 8
OG0003193	AT1G33920	ATPP2-A4_PP2-A4__phloem protein 2-A4
OG0003193	AT1G65390	ATPP2-A5_PP2-A5__phloem protein 2 A5
OG0003193	AT4G19840	ATPP2-A1_ATPP2A-1_PP2-A1__phloem protein 2-A1
OG0003193	AT4G19850	ATPP2-A2_PP2-A2_PP2A2__lectin-related
OG0003193	AT5G45080	AtPP2-A6_PP2-A6__phloem protein 2-A6
OG0003193	AT5G45090	AtPP2-A7_PP2-A7__phloem protein 2-A7
OG0003196	AT2G19910	RNA-dependent RNA polymerase family protein
OG0003196	AT2G19920	RNA-dependent RNA polymerase family protein
OG0003196	AT2G19930	RNA-dependent RNA polymerase family protein
OG0003197	AT4G03510	ATRMA1_RMA1__RING membrane-anchor 1
OG0003197	AT4G27470	ATRMA3_RMA3__RING membrane-anchor 3
OG0003197	AT4G28270	ATRMA2_RMA2__RING membrane-anchor 2
OG0003204	AT3G52170	DNA binding
OG0003204	AT5G58210	hydroxyproline-rich glycoprotein family protein
OG0003215	AT2G24240	BTB/POZ domain with WD40/YVTN repeat-like protein
OG0003215	AT4G30940	BTB/POZ domain with WD40/YVTN repeat-like protein
OG0003222	AT1G49360	F-box family protein
OG0003222	AT1G57790	F-box family protein
OG0003222	AT2G44735
OG0003222	AT3G18720	F-box family protein
OG0003222	AT3G56470	F-box family protein
OG0003222	AT4G00893
OG0003222	AT4G10660	CDC68-related
OG0003222	AT4G10695	CDC68-related
OG0003222	AT4G10700
OG0003222	AT4G12370
OG0003222	AT4G12382	F-box family protein
OG0003230	AT1G48500	AtJAZ4_JAZ4_TIFY6A__jasmonate-zim-domain protein 4
OG0003230	AT3G17860	JAI3_JAZ3_TIFY6B__jasmonate-zim-domain protein 3
OG0003231	AT4G37080	Protein of unknown function, DUF547
OG0003231	AT5G42690	Protein of unknown function, DUF547
OG0003237	AT1G33440	AtNPF4.4_NPF4.4__Major facilitator superfamily protein
OG0003237	AT1G59740	AtNPF4.3_NPF4.3__Major facilitator superfamily protein
OG0003241	AT1G54385	SINE1__ARM repeat superfamily protein
OG0003241	AT3G03970	SINE2__ARM repeat superfamily protein
OG0003244	AT1G05950
OG0003259	AT2G45250	Integral membrane protein hemolysin-III homolog
OG0003259	AT4G38280
OG0003267	AT1G67790
OG0003267	AT3G01670	AtSEOR2_SEOa_SEOR2
OG0003267	AT3G01680	AtSEOR1_SEOb_SEOR1
OG0003276	AT1G60500	DRP4C__Dynamin related protein 4C
OG0003276	AT1G60530	DRP4A__Dynamin related protein 4A
OG0003281	AT4G31940	CYP82C4__cytochrome P450, family 82, subfamily C, polypeptide 4
OG0003281	AT4G31950	CYP82C3__cytochrome P450, family 82, subfamily C, polypeptide 3
OG0003281	AT4G31970	CYP82C2__cytochrome P450, family 82, subfamily C, polypeptide 2
OG0003299	AT2G32530	ATCSLB03_ATCSLB3_CSLB03__cellulose synthase-like B3
OG0003299	AT2G32540	ATCSLB04_ATCSLB4_CSLB04_CSLB04__cellulose synthase-like B4
OG0003299	AT2G32610	ATCSLB01_ATCSLB1_CSLB01_CSLB01__cellulose synthase-like B1
OG0003299	AT2G32620	ATCSLB02_ATCSLB2_CSLB02_CSLB02__cellulose synthase-like B
OG0003299	AT4G15290	ATCSLB05_ATCSLB5_CSLB05__Cellulose synthase family protein
OG0003299	AT4G15320	ATCSLB06_ATCSLB6_CSLB06_CSLB06__cellulose synthase-like B6
OG0003304	AT1G17400	AtLAZY2_AtNGR1_DRO3_LAZY2
OG0003304	AT1G19115	AtNGR3_DRO2_LAZY3
OG0003304	AT1G72490	AtNGR2_DRO1_LAZY4
OG0003305	AT4G33590
OG0003305	AT4G33600
OG0003307	AT1G64080	MAKR2
OG0003307	AT5G52870	MAKR5
OG0003311	AT3G05690	ATHAP2B_AtNF-YA2_HAP2B_NF-YA2_UNE8__nuclear factor Y, subunit A2
OG0003311	AT5G06510	NF-YA10__nuclear factor Y, subunit A10
OG0003328	ATCG00680	PSBB__photosystem II reaction center protein B
OG0003354	ATCG01010	NDHF__NADH-Ubiquinone oxidoreductase (complex I), chain 5 protein
OG0003354	ATMG00513	NAD5_NAD5.1_NAD5A__NADH dehydrogenase 5A
OG0003366	AT5G19930	PGR__Protein of unknown function DUF92, transmembrane
OG0003379	AT1G33475	SNARE-like superfamily protein
OG0003379	AT4G10170	SNARE-like superfamily protein
OG0003379	AT4G27840	SNARE-like superfamily protein
OG0003379	AT5G52990	SNARE-like superfamily protein
OG0003390	AT4G32810	ATCCD8_CCD8_MAX4__carotenoid cleavage dioxygenase 8
OG0003401	AT1G35490	bZIP family transcription factor
OG0003401	AT1G58110	Basic-leucine zipper (bZIP) transcription factor family protein
OG0003401	AT4G06598
OG0003410	AT4G33160	F-box family protein
OG0003427	AT5G13880
OG0003427	AT5G47920
OG0003458	AT3G16660	Pollen Ole e 1 allergen and extensin family protein
OG0003458	AT3G16670	Pollen Ole e 1 allergen and extensin family protein
OG0003460	AT5G28885
OG0003469	AT4G19880	Glutathione S-transferase family protein
OG0003469	AT5G44990	Glutathione S-transferase family protein
OG0003469	AT5G45020	Glutathione S-transferase family protein
OG0003474	AT1G01240
OG0003474	AT2G46550
OG0003504	AT2G16385	CIF1
OG0003508	AT1G12380
OG0003508	AT1G62870
OG0003520	AT3G02890	AIPP2__RING/FYVE/PHD zinc finger superfamily protein
OG0003520	AT4G17850
OG0003520	AT5G16680	RING/FYVE/PHD zinc finger superfamily protein
OG0003523	AT5G17820	PER57__Peroxidase superfamily protein
OG0003523	AT5G22410	RHS18__root hair specific 18
OG0003526	AT1G70750	MyoB2__Protein of unknown function, DUF593
OG0003526	AT5G16720	MyoB3__Protein of unknown function, DUF593
OG0003530	AT1G08230	Transmembrane amino acid transporter family protein
OG0003531	AT1G07390	AtRLP1_RLP1__receptor like protein 1
OG0003531	AT1G54475
OG0003531	AT1G74170	AtRLP13_RLP13__receptor like protein 13
OG0003532	AT4G21366	Protein kinase superfamily protein
OG0003557	AT1G52450	Ubiquitin carboxyl-terminal hydrolase-related protein
OG0003557	AT1G65130	Ubiquitin carboxyl-terminal hydrolase-related protein
OG0003557	AT3G47890	Ubiquitin carboxyl-terminal hydrolase-related protein
OG0003557	AT3G47910	Ubiquitin carboxyl-terminal hydrolase-related protein
OG0003560	AT1G29950	SACL3__basic helix-loop-helix (bHLH) DNA-binding superfamily protein
OG0003578	AT4G16820	DALL1_PLA-I{beta]2__alpha/beta-Hydrolases superfamily protein
OG0003601	AT1G53920	GLIP5__GDSL-motif lipase 5
OG0003601	AT1G53940	GLIP2__GDSL-motif lipase 2
OG0003601	AT1G53970
OG0003601	AT1G53990	GLIP3__GDSL-motif lipase 3
OG0003601	AT3G14225	GLIP4__GDSL-motif lipase 4
OG0003601	AT5G40990	GLIP1__GDSL lipase 1
OG0003615	AT1G07730	Disease resistance-responsive (dirigent-like protein) family protein
OG0003615	AT2G28670	ESB1__Disease resistance-responsive (dirigent-like protein) family protein
OG0003615	AT2G39430	Disease resistance-responsive (dirigent-like protein) family protein
OG0003615	AT3G24020	Disease resistance-responsive (dirigent-like protein) family protein
OG0003615	AT3G55230	Disease resistance-responsive (dirigent-like protein) family protein
OG0003615	AT4G13580	Disease resistance-responsive (dirigent-like protein) family protein
OG0003620	AT1G78650	POLD3__DNA-directed DNA polymerases
OG0003631	AT1G51510	Y14__RNA-binding (RRM/RBD/RNP motifs) family protein
OG0003632	AT1G05291	Protein of unknown function (DUF1218)
OG0003632	AT1G11500	DEAL3__Protein of unknown function (DUF1218)
OG0003632	AT2G32280	VCC__Protein of unknown function (DUF1218)
OG0003632	AT4G21310	DEAL2__Protein of unknown function (DUF1218)
OG0003634	AT3G10120
OG0003634	AT5G03890
OG0003656	AT5G10250	DOT3__Phototropic-responsive NPH3 family protein
OG0003656	AT5G64330	JK218_NPH3_RPT3__Phototropic-responsive NPH3 family protein
OG0003657	AT3G17690	ATCNGC19_CNGC19__cyclic nucleotide gated channel 19
OG0003657	AT3G17700	ATCNGC20_CNBT1_CNGC20__cyclic nucleotide-binding transporter 1
OG0003666	AT1G50580	UDP-Glycosyltransferase superfamily protein
OG0003666	AT1G64910	UDP-Glycosyltransferase superfamily protein
OG0003666	AT1G64920	UDP-Glycosyltransferase superfamily protein
OG0003666	AT2G22930	UDP-Glycosyltransferase superfamily protein
OG0003666	AT3G29630	UDP-Glycosyltransferase superfamily protein
OG0003666	AT4G09500	UDP-Glycosyltransferase superfamily protein
OG0003666	AT4G27560	UGT79B2__UDP-Glycosyltransferase superfamily protein
OG0003666	AT4G27570	UGT79B3__UDP-Glycosyltransferase superfamily protein
OG0003666	AT5G53990	UDP-Glycosyltransferase superfamily protein
OG0003666	AT5G54010	UGT79B6__UDP-Glycosyltransferase superfamily protein
OG0003666	AT5G54060	UF3GT_UGT79B1__UDP-glucose:flavonoid 3-o-glucosyltransferase
OG0003679	AT1G08400	RINT-1 / TIP-1 family
OG0003679	AT3G47700	MAG2__RINT-1 / TIP-1 family
OG0003684	AT1G77800	PHD finger family protein
OG0003692	AT3G22550	Protein of unknown function (DUF581)
OG0003692	AT3G63210	MARD1__Protein of unknown function (DUF581)
OG0003716	AT1G73370	ATSUS6_SUS6__sucrose synthase 6
OG0003716	AT5G37180	ATSUS5_SUS5__sucrose synthase 5
OG0003724	AT2G42240	RNA-binding (RRM/RBD/RNP motifs) family protein
OG0003724	AT3G13700	RNA-binding (RRM/RBD/RNP motifs) family protein
OG0003727	AT4G16670	Plant protein of unknown function (DUF828) with plant pleckstrin homology-like region
OG0003727	AT4G17350	Plant protein of unknown function (DUF828) with plant pleckstrin homology-like region
OG0003727	AT5G47440	Plant protein of unknown function (DUF828) with plant pleckstrin homology-like region
OG0003753	AT1G30840	ATPUP4_PUP4__purine permease 4
OG0003763	AT1G05450	Bifunctional inhibitor/lipid-transfer protein/seed storage 2S albumin superfamily protein
OG0003763	AT2G48140	EDA4__Bifunctional inhibitor/lipid-transfer protein/seed storage 2S albumin superfamily protein
OG0003763	AT3G22620	Bifunctional inhibitor/lipid-transfer protein/seed storage 2S albumin superfamily protein
OG0003764	AT1G06580	PPR1__Pentatricopeptide repeat (PPR) superfamily protein
OG0003764	AT1G12300	RFL2__Tetratricopeptide repeat (TPR)-like superfamily protein
OG0003764	AT1G12620	Pentatricopeptide repeat (PPR) superfamily protein
OG0003764	AT1G12700	RPF1__ATP binding;nucleic acid binding;helicases
OG0003764	AT1G12775	Pentatricopeptide repeat (PPR) superfamily protein
OG0003764	AT1G62590	AtPPR-AC_PPR-AC__pentatricopeptide (PPR) repeat-containing protein
OG0003764	AT1G62670	RPF2__rna processing factor 2
OG0003764	AT1G62680	Pentatricopeptide repeat (PPR) superfamily protein
OG0003764	AT1G62720	AtNG1_NG1_PPR2__Pentatricopeptide repeat (PPR-like) superfamily protein
OG0003764	AT1G62910	RFL9_RPF4__Pentatricopeptide repeat (PPR) superfamily protein
OG0003764	AT1G62914	pentatricopeptide (PPR) repeat-containing protein
OG0003764	AT1G62930	RPF3__Tetratricopeptide repeat (TPR)-like superfamily protein
OG0003764	AT1G63070	pentatricopeptide (PPR) repeat-containing protein
OG0003764	AT1G63080	Pentatricopeptide repeat (PPR) superfamily protein
OG0003764	AT1G63130	RPF6__Tetratricopeptide repeat (TPR)-like superfamily protein
OG0003764	AT1G63150	Tetratricopeptide repeat (TPR)-like superfamily protein
OG0003764	AT1G63330	Pentatricopeptide repeat (PPR) superfamily protein
OG0003764	AT1G63400	Pentatricopeptide repeat (PPR) superfamily protein
OG0003764	AT1G64580	Pentatricopeptide repeat (PPR) superfamily protein
OG0003764	AT1G64583	Tetratricopeptide repeat (TPR)-like superfamily protein
OG0003764	AT3G16710	PPR4__Pentatricopeptide repeat (PPR) superfamily protein
OG0003764	AT3G22470	PPR3__Pentatricopeptide repeat (PPR) superfamily protein
OG0003764	AT4G26800	Pentatricopeptide repeat (PPR) superfamily protein
OG0003764	AT5G16640	Pentatricopeptide repeat (PPR) superfamily protein
OG0003764	AT5G41170	Pentatricopeptide repeat (PPR-like) superfamily protein
OG0003795	AT4G18820	AAA-type ATPase family protein
OG0003795	AT5G45720	AAA-type ATPase family protein
OG0003802	AT3G52430	ATPAD4_PAD4__alpha/beta-Hydrolases superfamily protein
OG0003815	AT2G48100	Exonuclease family protein
OG0003815	AT3G27970	Exonuclease family protein
OG0003815	AT5G40310	Exonuclease family protein
OG0003828	AT3G66652	fip1 motif-containing protein
OG0003828	AT5G58040	ATFIP1[V]_ATFIPS5_FIP1[V]_FIPS5__homolog of yeast FIP1 [V]
OG0003830	AT5G08410	FTRA2__ferredoxin/thioredoxin reductase subunit A (variable subunit) 2
OG0003830	AT5G23440	FTRA1__ferredoxin/thioredoxin reductase subunit A (variable subunit) 1
OG0003831	AT2G18196	Heavy metal transport/detoxification superfamily protein
OG0003831	AT4G10465	Heavy metal transport/detoxification superfamily protein
OG0003834	AT5G07280	EMS1_EXS__Leucine-rich repeat transmembrane protein kinase
OG0003847	AT1G03970	GBF4__G-box binding factor 4
OG0003847	AT5G44080	Basic-leucine zipper (bZIP) transcription factor family protein
OG0003856	AT1G04645	Plant self-incompatibility protein S1 family
OG0003856	AT1G11765	Plant self-incompatibility protein S1 family
OG0003856	AT1G26795	Plant self-incompatibility protein S1 family
OG0003856	AT1G26796	Plant self-incompatibility protein S1 family
OG0003856	AT1G26797	Plant self-incompatibility protein S1 family
OG0003856	AT1G26798	Plant self-incompatibility protein S1 family
OG0003856	AT1G26799	Plant self-incompatibility protein S1 family
OG0003856	AT3G16960
OG0003856	AT3G16970	Plant self-incompatibility protein S1 family
OG0003856	AT3G17080	Plant self-incompatibility protein S1 family
OG0003856	AT3G26860	Plant self-incompatibility protein S1 family
OG0003856	AT3G55665	Plant self-incompatibility protein S1 family
OG0003856	AT3G55672	Plant self-incompatibility protein S1 family
OG0003856	AT3G55677	Plant self-incompatibility protein S1 family
OG0003856	AT3G57840	Plant self-incompatibility protein S1 family
OG0003856	AT4G16195	Plant self-incompatibility protein S1 family
OG0003856	AT4G16295	SPH1__S-protein homologue 1
OG0003856	AT4G24973	Plant self-incompatibility protein S1 family
OG0003856	AT4G24974	Plant self-incompatibility protein S1 family
OG0003856	AT4G24975	Plant self-incompatibility protein S1 family
OG0003856	AT4G29035	Plant self-incompatibility protein S1 family
OG0003856	AT5G06020	Plant self-incompatibility protein S1 family
OG0003856	AT5G06030	Plant self-incompatibility protein S1 family
OG0003856	AT5G12060	Plant self-incompatibility protein S1 family
OG0003856	AT5G12070	Plant self-incompatibility protein S1 family
OG0003873	AT2G31940
OG0003873	AT5G19875
OG0003884	AT1G30135	JAZ8_TIFY5A__jasmonate-zim-domain protein 8
OG0003884	AT2G34600	JAZ7_TIFY5B__jasmonate-zim-domain protein 7
OG0003884	AT3G22275	JAZ13
OG0003885	AT5G14700	NAD(P)-binding Rossmann-fold superfamily protein
OG0003902	AT3G18710	ATPUB29_PUB29__plant U-box 29
OG0003902	AT5G09800	ARM repeat superfamily protein
OG0003902	AT5G64660	ATCMPG2_CMPG2__CYS, MET, PRO, and GLY protein 2
OG0003914	AT1G04030
OG0003914	AT2G33400
OG0003914	AT5G44040
OG0003919	AT1G42550	PMI1__plastid movement impaired1
OG0003928	AT1G19980	cytomatrix protein-related
OG0003936	AT1G55550	P-loop containing nucleoside triphosphate hydrolases superfamily protein
OG0003936	AT5G27950	P-loop containing nucleoside triphosphate hydrolases superfamily protein
OG0003937	AT5G02890	HXXXD-type acyl-transferase family protein. Overexpression causes a glossy phenotype and defects in cuticular wax deposition. OE plants are blocked in very long chain fatty acid elongation (C28 and higher).
OG0003942	AT1G17030
OG0003942	AT2G47010
OG0003955	AT2G27740	Family of unknown function (DUF662)
OG0003955	AT2G36355	Family of unknown function (DUF662)
OG0003955	AT2G36410	Family of unknown function (DUF662)
OG0003955	AT3G09980	ACIP1__Family of unknown function (DUF662)
OG0003955	AT3G52900	Family of unknown function (DUF662)
OG0003955	AT3G52920	Family of unknown function (DUF662)
OG0003955	AT5G03660	Family of unknown function (DUF662)
OG0003956	AT1G19860	Zinc finger C-x8-C-x5-C-x3-H type family protein
OG0003956	AT3G51180	Zinc finger C-x8-C-x5-C-x3-H type family protein
OG0003956	AT5G66270	Zinc finger C-x8-C-x5-C-x3-H type family protein
OG0003972	AT1G14180	RING/U-box superfamily protein
OG0003972	AT5G18260	RING/U-box superfamily protein
OG0003989	AT1G17147	VQ motif-containing protein
OG0003989	AT1G78410	VQ motif-containing protein
OG0004005	AT1G64660	ATMGL_MGL__methionine gamma-lyase
OG0004030	AT5G14780	AtFDH1_FDH__formate dehydrogenase
OG0004042	AT2G42260	PYM_UVI4__uv-b-insensitive 4
OG0004042	AT3G57860	GIG1_OSD1_UVI4-LIKE__UV-B-insensitive 4-like
OG0004043	AT5G65840	Thioredoxin superfamily protein
OG0004044	AT4G34430	ATSWI3D_CHB3__DNA-binding family protein
OG0004067	AT4G34560
OG0004067	AT5G66440
OG0004071	AT4G02550
OG0004080	AT1G69080	Adenine nucleotide alpha hydrolases-like superfamily protein
OG0004080	AT2G03720	MRH6__Adenine nucleotide alpha hydrolases-like superfamily protein
OG0004080	AT3G03290	Adenine nucleotide alpha hydrolases-like superfamily protein
OG0004080	AT5G17390	Adenine nucleotide alpha hydrolases-like superfamily protein
OG0004117	AT1G71692	AGL12_XAL1__AGAMOUS-like 12
OG0004132	AT1G26600	CLE9__CLAVATA3/ESR-RELATED 9
OG0004132	AT1G49005	CLE11__CLAVATA3/ESR-RELATED 11
OG0004132	AT1G68795	CLE12__CLAVATA3/ESR-RELATED 12
OG0004132	AT1G69320	CLE10__CLAVATA3/ESR-RELATED 10
OG0004132	AT1G73965	CLE13__CLAVATA3/ESR-RELATED 13
OG0004138	AT1G14710	hydroxyproline-rich glycoprotein family protein
OG0004159	AT1G03140	splicing factor Prp18 family protein
OG0004159	AT1G54590
OG0004160	AT1G20970
OG0004171	AT4G25330
OG0004174	AT2G28815
OG0004174	ATCG00790	RPL16__ribosomal protein L16
OG0004174	ATMG00080	RPL16__ribosomal protein L16
OG0004177	AT1G17615	TN2__Disease resistance protein (TIR-NBS class)
OG0004177	AT1G57830	Toll-Interleukin-Resistance (TIR) domain family protein
OG0004177	AT1G60320	Toll-Interleukin-Resistance (TIR) domain family protein
OG0004177	AT1G72890	Disease resistance protein (TIR-NBS class)
OG0004177	AT1G72900	Toll-Interleukin-Resistance (TIR) domain-containing protein
OG0004177	AT1G72910	Toll-Interleukin-Resistance (TIR) domain-containing protein
OG0004177	AT1G72920	Toll-Interleukin-Resistance (TIR) domain family protein
OG0004177	AT1G72930	AtTN10_TIR_TN10__toll/interleukin-1 receptor-like
OG0004177	AT1G72940	Toll-Interleukin-Resistance (TIR) domain-containing protein
OG0004177	AT1G72950	Disease resistance protein (TIR-NBS class)
OG0004177	AT5G48780	disease resistance protein (TIR-NBS class)
OG0004178	AT1G71120	GLIP6__GDSL-motif lipase/hydrolase 6
OG0004188	AT2G23930	SNRNP-G__probable small nuclear ribonucleoprotein G
OG0004188	AT3G11500	Small nuclear ribonucleoprotein family protein
OG0004197	AT2G37750
OG0004197	AT5G02090
OG0004211	ATCG00180	RPOC1__DNA-directed RNA polymerase family protein
OG0004221	AT4G16447
OG0004223	AT3G01516
OG0004223	AT5G14690
OG0004257	AT1G05590	ATHEX3_HEXO2__beta-hexosaminidase 2
OG0004260	AT5G07620	Protein kinase superfamily protein
OG0004260	AT5G61570	Protein kinase superfamily protein
OG0004323	AT1G27850
OG0004325	AT3G26960	Pollen Ole e 1 allergen and extensin family protein
OG0004325	AT5G13140	Pollen Ole e 1 allergen and extensin family protein
OG0004325	AT5G41050	Pollen Ole e 1 allergen and extensin family protein
OG0004327	AT1G13920	Remorin family protein
OG0004327	AT1G69325	Remorin family protein
OG0004327	AT5G61280	Remorin family protein
OG0004398	AT2G28780
OG0004398	AT3G09450
OG0004399	AT1G03660	Ankyrin-repeat containing protein
OG0004399	AT4G03460	Ankyrin repeat family protein
OG0004406	AT5G52900	MAKR6
OG0004431	AT1G68910	WIT2__WPP domain-interacting protein 2
OG0004431	AT5G11390	WIT1__WPP domain-interacting protein 1
OG0004466	AT1G22470
OG0004466	AT1G35210
OG0004466	AT1G72240
OG0004470	AT1G09710	Homeodomain-like superfamily protein
OG0004470	AT1G58220	Homeodomain-like superfamily protein
OG0004471	AT1G22680
OG0004471	AT1G71970
OG0004472	AT1G11475	NRPB10_NRPD10_NRPE10__RNA polymerases N / 8 kDa subunit
OG0004472	AT1G61700	RNA polymerases N / 8 kDa subunit
OG0004475	AT3G26380	Melibiase family protein
OG0004476	AT3G11590
OG0004476	AT5G22310
OG0004478	AT5G20635	AGG3
OG0004483	AT1G03080	NET1D__kinase interacting (KIP1-like) family protein
OG0004483	AT3G22790	NET1A__Kinase interacting (KIP1-like) family protein
OG0004483	AT4G14760	NET1B__kinase interacting (KIP1-like) family protein
OG0004485	AT1G22790
OG0004485	AT1G34010
OG0004495	AT5G10680	calmodulin-binding protein-related
OG0004495	AT5G10720	AHK5_CKI2_HK5__histidine kinase 5
OG0004501	AT1G26590	C2H2-like zinc finger protein
OG0004501	AT1G26610	C2H2-like zinc finger protein
OG0004528	AT1G18750	AGL65__AGAMOUS-like 65
OG0004528	AT1G69540	AGL94__AGAMOUS-like 94
OG0004528	AT2G03060	AGL30__AGAMOUS-like 30
OG0004528	AT2G26320	AGL33__AGAMOUS-like 33
OG0004533	AT5G50610
OG0004533	AT5G50710
OG0004543	AT1G19490	Basic-leucine zipper (bZIP) transcription factor family protein
OG0004552	ATCG00900	RPS7_RPS7.1__Ribosomal protein S7p/S5e family protein
OG0004552	ATCG01240	RPS7.2__ribosomal protein S7
OG0004553	AT5G42670	Agenet domain-containing protein
OG0004553	AT5G52070	Agenet domain-containing protein
OG0004558	AT1G58210	EMB1674_NET2A__kinase interacting family protein
OG0004558	AT5G02520	KNL2
OG0004570	AT1G11925	Stigma-specific Stig1 family protein
OG0004572	AT5G06740	LecRK-S.5__Concanavalin A-like lectin protein kinase family protein
OG0004576	AT4G39790	Protein of unknown function (DUF630 and DUF632)
OG0004581	AT1G52603
OG0004581	AT1G67235
OG0004586	AT3G45830
OG0004597	AT5G55960
OG0004603	AT1G64180	intracellular protein transport protein USO1-related
OG0004603	AT2G46250	myosin heavy chain-related
OG0004603	AT5G41620
OG0004604	AT1G10380	Putative membrane lipoprotein
OG0004604	AT1G11915
OG0004608	AT4G20880	ethylene-responsive nuclear protein / ethylene-regulated nuclear protein (ERT2)
OG0004608	AT5G44350	ethylene-responsive nuclear protein -related
OG0004644	AT1G63520	Protein of unknown function (DUF3527)
OG0004644	AT4G11450	Protein of unknown function (DUF3527)
OG0004650	AT1G27461
OG0004676	AT1G09520
OG0004676	AT3G17460	PHD finger family protein
OG0004680	AT1G76660
OG0004696	AT2G43650	EMB2777_THAL__Sas10/U3 ribonucleoprotein (Utp) family protein
OG0004696	AT3G28230
OG0004705	AT4G03090	AtNDX_NDX__sequence-specific DNA binding;sequence-specific DNA binding transcription factors
OG0004715	AT1G70230	AXY4_TBL27__TRICHOME BIREFRINGENCE-LIKE 27
OG0004723	AT2G40550	ETG1__E2F target gene 1
OG0004729	AT3G19920
OG0004729	AT5G64230
OG0004732	AT2G05910	Protein of unknown function (DUF567)
OG0004732	AT5G20640	Protein of unknown function (DUF567)
OG0004744	AT2G30890	Cytochrome b561/ferric reductase transmembrane protein family
OG0004744	AT4G18260	Cytochrome b561/ferric reductase transmembrane protein family
OG0004745	AT4G29680	Alkaline-phosphatase-like family protein
OG0004745	AT4G29690	Alkaline-phosphatase-like family protein
OG0004745	AT4G29700	Alkaline-phosphatase-like family protein
OG0004745	AT4G29710	Alkaline-phosphatase-like family protein
OG0004819	AT2G15580	RING/U-box superfamily protein
OG0004826	AT3G09110	Protein of unknown function (DUF674)
OG0004826	AT3G09140	Protein of unknown function (DUF674)
OG0004826	AT5G01120	Protein of unknown function (DUF674)
OG0004826	AT5G01140	Protein of unknown function (DUF674)
OG0004826	AT5G01150	Protein of unknown function (DUF674)
OG0004826	AT5G37320	Protein of unknown function (DUF674)
OG0004826	AT5G43240	Protein of unknown function (DUF674)
OG0004861	AT5G09460	SACL1__sequence-specific DNA binding transcription factors;transcription regulators
OG0004861	AT5G50010	SACL2__sequence-specific DNA binding transcription factors;transcription regulators
OG0004861	AT5G64340	SAC51__sequence-specific DNA binding transcription factors;transcription regulators
OG0004863	ATMG00750	ORF119__GAG/POL/ENV polyprotein
OG0004888	AT4G02170
OG0004888	AT5G38700
OG0004893	AT3G43610	Spc97 / Spc98 family of spindle pole body (SBP) component
OG0004901	AT1G21700	ATSWI3C_CHB4_SWI3C__SWITCH/sucrose nonfermenting 3C
OG0004918	AT1G30570	HERK2__hercules receptor kinase 2
OG0004919	AT3G18310
OG0004922	AT2G46560	transducin family protein / WD-40 repeat family protein
OG0004936	AT3G48880	RNI-like superfamily protein
OG0004936	AT4G11580	RNI-like superfamily protein
OG0004938	AT2G22880	VQ12__VQ motif-containing protein
OG0004938	AT4G37710	VQ29__VQ motif-containing protein
OG0004961	AT1G08160	Late embryogenesis abundant (LEA) hydroxyproline-rich glycoprotein family
OG0004961	AT5G22870	Late embryogenesis abundant (LEA) hydroxyproline-rich glycoprotein family
OG0004963	AT1G17750	AtPEPR2_PEPR2__PEP1 receptor 2
OG0004963	AT1G73080	ATPEPR1_PEPR1__PEP1 receptor 1
OG0004967	AT4G16620	UMAMIT8__nodulin MtN21 /EamA-like transporter family protein
OG0004967	AT5G47470	UMAMIT7__Nodulin MtN21 /EamA-like transporter family protein
OG0004969	AT4G24200	Transcription elongation factor (TFIIS) family protein
OG0004979	AT2G37900	Major facilitator superfamily protein
OG0004979	AT3G53960	Major facilitator superfamily protein
OG0004980	AT3G55420
OG0005006	AT2G42180
OG0005006	AT3G57950
OG0005006	AT5G06790
OG0005022	AT1G45248	Nucleolar histone methyltransferase-related protein
OG0005022	AT2G40020	Nucleolar histone methyltransferase-related protein
OG0005035	AT1G58460
OG0005035	AT4G33800
OG0005065	AT3G46300
OG0005065	AT3G46310
OG0005065	AT5G02640
OG0005070	AT2G47890	B-box type zinc finger protein with CCT domain
OG0005078	AT1G22230
OG0005078	AT1G78110
OG0005084	AT2G31880	EVR_SOBIR1__Leucine-rich repeat protein kinase family protein
OG0005095	AT1G28050	BBX13__B-box type zinc finger protein with CCT domain
OG0005095	AT2G33500	BBX12__B-box type zinc finger protein with CCT domain
OG0005104	AT5G53440
OG0005110	AT2G46940
OG0005110	AT3G62070
OG0005110	AT4G01670
OG0005113	AT1G71430
OG0005120	AT1G64290	F-box protein-related
OG0005120	AT1G64295	F-box associated ubiquitination effector family protein
OG0005120	AT2G05360
OG0005120	AT5G41720
OG0005120	AT5G49610	F-box family protein
OG0005148	AT4G35530	phosphatidylinositolglycan-related
OG0005152	AT3G10380	ATSEC8_SEC8__subunit of exocyst complex 8
OG0005154	AT4G31600	UTr7__UDP-N-acetylglucosamine (UAA) transporter family
OG0005156	AT4G26000	PEP__RNA-binding KH domain-containing protein
OG0005163	AT5G60150
OG0005169	AT2G07656
OG0005169	AT5G42905	Polynucleotidyl transferase, ribonuclease H-like superfamily protein
OG0005208	AT1G51405	myosin-related
OG0005210	ATCG00540	PETA__photosynthetic electron transfer A
OG0005227	AT5G53670
OG0005238	AT3G63430	TRM5
OG0005239	AT1G08910	PIAL1__zinc ion binding;zinc ion binding
OG0005239	AT5G41580	PIAL2__RING/U-box superfamily protein
OG0005256	AT5G27730	Protein of unknown function (DUF1624)
OG0005257	AT3G06890
OG0005263	AT4G22190
OG0005298	AT1G50930	VUP2
OG0005298	AT3G20557	VUP3
OG0005298	AT3G21710	VUP1
OG0005298	AT5G54790	VUP4
OG0005309	AT2G17550	TRM26
OG0005313	AT4G20060	DSP1_EMB1895__ARM repeat superfamily protein
OG0005316	AT5G45800	MEE62__Leucine-rich repeat protein kinase family protein
OG0005323	AT1G07795
OG0005323	AT2G28725
OG0005323	AT2G37530
OG0005336	AT1G12230	Aldolase superfamily protein
OG0005348	AT2G35730	Heavy metal transport/detoxification superfamily protein
OG0005368	AT3G06868
OG0005368	AT5G49100
OG0005400	AT1G69970	CLE26__CLAVATA3/ESR-RELATED 26
OG0005400	AT3G28455	CLE25__CLAVATA3/ESR-RELATED 25
OG0005403	AT2G07695	Cytochrome C oxidase subunit II-like, transmembrane domain
OG0005403	ATMG00160	COX2__cytochrome oxidase 2
OG0005403	ATMG01280	ORF291__Cytochrome C oxidase subunit II-like, transmembrane domain
OG0005408	AT3G52500	Eukaryotic aspartyl protease family protein
OG0005410	AT1G45215	Protein of unknown function (DUF784)
OG0005410	AT1G45221	Bifunctional inhibitor/lipid-transfer protein/seed storage 2S albumin superfamily protein
OG0005410	AT1G45223	Protein of unknown function (DUF784)
OG0005410	AT1G57760	Protein of unknown function (DUF784)
OG0005410	AT1G57775	Protein of unknown function (DUF784)
OG0005410	AT1G57777	Protein of unknown function (DUF784)
OG0005410	AT3G30383	Protein of unknown function (DUF784)
OG0005410	AT3G30385	Protein of unknown function (DUF784)
OG0005410	AT3G30387	Protein of unknown function (DUF784)
OG0005410	AT3G44115	Protein of unknown function (DUF784)
OG0005410	AT4G07515	Protein of unknown function (DUF784)
OG0005410	AT4G08025	Protein of unknown function (DUF784)
OG0005410	AT5G34881	Protein of unknown function (DUF784)
OG0005410	AT5G34882	Protein of unknown function (DUF784)
OG0005410	AT5G34883	Protein of unknown function (DUF784)
OG0005410	AT5G34885	Protein of unknown function (DUF784)
OG0005410	AT5G34887	Protein of unknown function (DUF784)
OG0005410	AT5G34905	Protein of unknown function (DUF784)
OG0005410	AT5G34908	Protein of unknown function (DUF784)
OG0005410	AT5G42567	Protein of unknown function (DUF784)
OG0005410	AT5G42955	Protein of unknown function (DUF784)
OG0005410	AT5G42957	Protein of unknown function (DUF784)
OG0005448	AT5G42680	Protein of unknown function, DUF617
OG0005450	AT3G08800	DSP3_SIEL__ARM repeat superfamily protein
OG0005451	AT3G12090	TET6__tetraspanin6
OG0005451	AT4G23410	TET5__tetraspanin5
OG0005469	AT3G02400	FHA3__SMAD/FHA domain-containing protein
OG0005469	AT4G14490	SMAD/FHA domain-containing protein
OG0005479	AT2G20080	TIE2
OG0005479	AT4G28840	TIE1
OG0005486	AT5G41800	Transmembrane amino acid transporter family protein
OG0005500	AT1G66840	PMI2_WEB2__Plant protein of unknown function (DUF827)
OG0005500	AT5G38150	PMI15__Plant protein of unknown function (DUF827)
OG0005508	AT2G17975	SRP1__zinc finger (Ran-binding) family protein
OG0005509	AT4G24110
OG0005569	AT4G25720	ATQC_QC_QCT__glutaminyl cyclase
OG0005578	AT3G22250	UDP-Glycosyltransferase superfamily protein
OG0005592	AT1G52080	AR791__actin binding protein family
OG0005592	AT2G36650
OG0005600	AT1G77620	P-loop containing nucleoside triphosphate hydrolases superfamily protein
OG0005603	AT3G53840	Protein kinase superfamily protein
OG0005603	AT5G02070	Protein kinase family protein
OG0005608	AT1G13800	FAC19__Tetratricopeptide repeat (TPR)-like superfamily protein
OG0005608	AT2G26790	Pentatricopeptide repeat (PPR) superfamily protein
OG0005624	AT2G07565
OG0005624	AT2G07739	Ycf1 protein
OG0005624	ATMG00370	ORF199__Ycf1 protein
OG0005639	AT1G26210	ATSOFL1_SOFL1__SOB five-like 1
OG0005639	AT1G68870	ATSOFL2_SOFL2__SOB five-like 2
OG0005639	AT3G30580
OG0005639	AT5G08150	SOB5__suppressor of phytochrome b 5
OG0005639	AT5G38790
OG0005656	AT2G39518	CASPL4D2__Uncharacterised protein family (UPF0497)
OG0005656	AT2G39530	CASPL4D1__Uncharacterised protein family (UPF0497)
OG0005673	AT3G08840	D-alanine--D-alanine ligase family
OG0005677	AT3G06560	PAPS3__poly(A) polymerase 3
OG0005679	AT2G16760	Calcium-dependent phosphotriesterase superfamily protein
OG0005679	AT2G47370	Calcium-dependent phosphotriesterase superfamily protein
OG0005679	AT5G28660	NHL domain-containing protein
OG0005683	AT1G61760	Late embryogenesis abundant (LEA) hydroxyproline-rich glycoprotein family
OG0005683	AT4G05220	Late embryogenesis abundant (LEA) hydroxyproline-rich glycoprotein family
OG0005704	AT2G15560	Putative endonuclease or glycosyl hydrolase
OG0005707	AT2G46980	ASY3_AtASY3
OG0005707	AT5G20995
OG0005715	AT4G16563	Eukaryotic aspartyl protease family protein
OG0005715	AT5G45120	Eukaryotic aspartyl protease family protein
OG0005728	AT3G23840	AtPNP-R1_CER26-LIKE__HXXXD-type acyl-transferase family protein
OG0005728	AT4G13840	CER26__HXXXD-type acyl-transferase family protein
OG0005728	AT4G24510	CER2_VC-2_VC2__HXXXD-type acyl-transferase family protein
[truncated: 2,402 more rows]

[truncated: 11 more sheets: Supplemental_Table_S11, Supplemental_Table_S12, Supplemental_Table_S13, Supplemental_Table_S14, Supplemental_Table_S15, Supplemental_Table_S16, Supplemental_Table_S17, Supplemental_Table_S18, Supplemental_Table_S19, Supplemental_Table_S20, Supplemental_Table_S21]
